# Supplementary material for: The Hidden Genomic Diversity, Specialized Metabolite Capacity, and Revised Taxonomy of Burkholderia Sensu Lato
Source: Front Microbiol. 2021 Sep 22;12:726847. doi: 10.3389/fmicb.2021.726847 (PMC8506256; doi:10.3389/fmicb.2021.726847)
Supplement: Supplementary file 2 [file Table_1.xlsx]

## Sheet: Sheet1
Table S1. Genomes excluded from study due to poor quality
Genome Accession	NCBI order/family/genus	NCBI species	NCBI strain
GCA_902829395.1	Burkholderia	ambifaria	BCC1224
GCA_902829375.1	Burkholderia	anthina	BCC0485
GCA_001056435.1	Burkholderia	cenocepacia	34_BCEN
GCA_001058445.1	Burkholderia	cenocepacia	79_BCEN
GCA_001071265.1	Burkholderia	cenocepacia	528_BCEN
GCA_001073275.1	Burkholderia	cenocepacia	530_BMUL
GCA_001276275.1	Burkholderia	cenocepacia	C14
GCA_001719305.1	Burkholderia	cenocepacia	C141BCUC
GCA_001991235.1	Burkholderia	cenocepacia	VC9041
GCA_001991455.1	Burkholderia	cenocepacia	VC7945
GCA_001991745.1	Burkholderia	cenocepacia	VC8947
GCA_001991955.1	Burkholderia	cenocepacia	VC6533
GCA_001993275.1	Burkholderia	cenocepacia	VC9970
GCA_001993515.1	Burkholderia	cenocepacia	VC14112
GCA_002083015.1	Burkholderia	cenocepacia	GIMC4560:Bcn122
GCA_903231415.1	Burkholderia	cenocepacia	IST4131
GCA_903231425.1	Burkholderia	cenocepacia	IST4129
GCA_903231445.1	Burkholderia	cenocepacia	IST4116A
GCA_903231465.1	Burkholderia	cenocepacia	IST4110
GCA_903231475.1	Burkholderia	cenocepacia	IST4134
GCA_903231515.1	Burkholderia	cenocepacia	IST4112
GCA_903231525.1	Burkholderia	cenocepacia	IST4116B
GCA_903231535.1	Burkholderia	cenocepacia	IST4113
GCA_903231545.1	Burkholderia	cenocepacia	IST439
GCA_903470625.1	Burkholderia	cenocepacia	IST4103
GCA_903470695.1	Burkholderia	cenocepacia	IST4130
GCA_001052915.1	Burkholderia	cepacia	1178_BCEN
GCA_902825085.1	Burkholderia	cepacia	IST701
GCA_003363165.1	Burkholderia	contaminans	NZ
GCA_903879325.1	Burkholderia	contaminans	BCC1590
GCA_000365265.1	Burkholderia	gladioli	3848s-5
GCA_009911875.1	Burkholderia	gladioli	LvStB
GCA_009914575.1	Burkholderia	gladioli	DBSCAN_round1_3
GCA_902831725.1	Burkholderia	gladioli	BCC1776
GCA_000365245.1	Burkholderia	glumae	3252-8
GCA_000503955.1	Burkholderia	glumae	336gr-1
GCA_000801065.1	Burkholderia	glumae	NCPPB 3923
GCA_000616025.1	Burkholderia	kururiensis	JCM_10599
GCA_001058025.1	Burkholderia	multivorans	701_BMUL
GCA_002222845.1	Burkholderia	multivorans	DSOPR54
GCA_002222875.1	Burkholderia	multivorans	DSOPR57
GCA_003255975.1	Burkholderia	multivorans	Bmul_CF170.1i
GCA_003256525.1	Burkholderia	multivorans	Bmul_CF170.7a
GCA_003256555.1	Burkholderia	multivorans	Bmul_CF170.8b
GCA_003256605.1	Burkholderia	multivorans	Bmul_CF170.9a
GCA_003256675.1	Burkholderia	multivorans	Bmul_CF170.10a
GCA_003257315.1	Burkholderia	multivorans	Bmul_CF170.10b
GCA_003257615.1	Burkholderia	multivorans	Bmul_CF170.3f
GCA_003257795.1	Burkholderia	multivorans	Bmul_CF170.6a
GCA_003257975.1	Burkholderia	multivorans	Bmul_CF170.9b
GCA_010645215.1	Burkholderia	multivorans	WS-FJ9
GCA_903470515.1	Burkholderia	multivorans	IST424
GCA_903470535.1	Burkholderia	multivorans	IST455B
GCA_903470545.1	Burkholderia	multivorans	IST419
GCA_903470555.1	Burkholderia	multivorans	IST455A
GCA_903470565.1	Burkholderia	multivorans	IST495A
GCA_903470575.1	Burkholderia	multivorans	IST461
GCA_903470585.1	Burkholderia	multivorans	IST453
GCA_903470605.1	Burkholderia	multivorans	IST495B
GCA_903470685.1	Burkholderia	multivorans	IST4119
GCA_009914595.1	Burkholderia	plantarii	cluster_DBSCAN_round6_14
GCA_000170415.1	Burkholderia	pseudomallei	DM98
GCA_000170435.1	Burkholderia	pseudomallei	14
GCA_000170455.1	Burkholderia	pseudomallei	91
GCA_000170475.1	Burkholderia	pseudomallei	9
GCA_000170515.1	Burkholderia	pseudomallei	B7210
GCA_000170535.1	Burkholderia	pseudomallei	7894
GCA_000170555.1	Burkholderia	pseudomallei	112
GCA_000170575.1	Burkholderia	pseudomallei	NCTC13177
GCA_000170595.1	Burkholderia	pseudomallei	BCC215
GCA_000346205.1	Burkholderia	pseudomallei	MARAN
GCA_000401035.1	Burkholderia	pseudomallei	VEL
GCA_000401055.1	Burkholderia	pseudomallei	THE
GCA_000401075.1	Burkholderia	pseudomallei	OB
GCA_000401095.1	Burkholderia	pseudomallei	OS
GCA_000401115.1	Burkholderia	pseudomallei	CB
GCA_000401135.1	Burkholderia	pseudomallei	CS
GCA_000401155.1	Burkholderia	pseudomallei	LMF
GCA_006382045.1	Burkholderia	pseudomallei	BP-6887
GCA_013371805.1	Burkholderia	pseudomallei	haikou7
GCA_013371815.1	Burkholderia	pseudomallei	haikou5
GCA_013371835.1	Burkholderia	pseudomallei	haikou8
GCA_013371925.1	Burkholderia	pseudomallei	haikou1
GCA_000801975.1	Burkholderia	sp. A9
GCA_903879245.1	Burkholderia	sp. AU31652
GCA_903879265.1	Burkholderia	sp. AU31652
GCA_903879275.1	Burkholderia	sp. AU31652
GCA_903879285.1	Burkholderia	sp. AU31652
GCA_903879315.1	Burkholderia	sp. AU31652
GCA_903879385.1	Burkholderia	sp. AU31652
GCA_902829715.1	Burkholderia	sp. BCC1642
GCA_011753155.1	Burkholderia	sp. Cy-647
GCA_000483185.1	Burkholderia	sp. JGI 0001005-I06
GCA_000485195.1	Burkholderia	sp. JGI 0001009-G23
GCA_000485075.1	Burkholderia	sp. JGI 0001009-M21
GCA_000485235.1	Burkholderia	sp. JGI 0001021-D09
GCA_000485395.1	Burkholderia	sp. JGI 0001021-E08
GCA_000483245.1	Burkholderia	sp. JGI 0001021-E12
GCA_000483205.1	Burkholderia	sp. JGI 0001021-N16
GCA_000485355.1	Burkholderia	sp. JGI 0001021-N20
GCA_000463695.2	Burkholderia	sp. JGI 001009-G21
GCA_000439005.2	Burkholderia	sp. JGI 001012-B17
GCA_000493855.1	Burkholderia	sp. JGI 001013-G13
GCA_000191945.2	Burkholderia	sp. TJI49
GCA_008802115.1	Burkholderia	territorii	CCUG 65687
GCA_000170495.1	Burkholderia	thailandensis	MSMB43
GCA_004328405.1	Burkholderia	thailandensis	E555
GCA_000170335.1	Burkholderia	ubonensis	Bu
GCA_001882755.1	Burkholderia	ubonensis	MSMB0169
GCA_902833405.1	Burkholderia	vietnamiensis	BCC0581
GCA_002400655.1	Burkholderiaceae		NORP183
GCA_004322085.1	Burkholderiaceae		FW106-02_bin.10
GCA_008012385.1	Burkholderiaceae		Bin_7_2
GCA_008012415.1	Burkholderiaceae		Bin_27_2
GCA_008015065.1	Burkholderiaceae		Bin_30
GCA_008017115.1	Burkholderiaceae		Bin_15_2
GCA_008933565.1	Burkholderiaceae		SB23
GCA_009918115.1	Burkholderiaceae		WB7_1A_017
GCA_009918125.1	Burkholderiaceae		WB7_1A_035
GCA_009918635.1	Burkholderiaceae		WB6_1A_043
GCA_009919325.1	Burkholderiaceae		WB6_3B_098
GCA_009919455.1	Burkholderiaceae		WB6_3B_048
GCA_009919585.1	Burkholderiaceae		WB6_3A_101
GCA_009920065.1	Burkholderiaceae		WB6_3A_053
GCA_009920285.1	Burkholderiaceae		WB5_2B_111
GCA_009922995.1	Burkholderiaceae		WB5_2A_099
GCA_009923955.1	Burkholderiaceae		WB4_2_0519
GCA_009927145.1	Burkholderiaceae		LLD_174
GCA_010021635.1	Burkholderiaceae		WB8_1B_042
GCA_010021665.1	Burkholderiaceae		WB8_1B_014
GCA_010021825.1	Burkholderiaceae		WB8_1A_035
GCA_010022145.1	Burkholderiaceae		WB7_2xM_007
GCA_010022325.1	Burkholderiaceae		WB7_2xA_007
GCA_010022525.1	Burkholderiaceae		WB7_2xN_007
GCA_010022615.1	Burkholderiaceae		WB7_2xB_045
GCA_010022685.1	Burkholderiaceae		WB7_2xC_005
GCA_010022785.1	Burkholderiaceae		WB7_2xG_006
GCA_010022835.1	Burkholderiaceae		WB7_2xJ_007
GCA_010023225.1	Burkholderiaceae		WB7_2xH_006
GCA_010023645.1	Burkholderiaceae		WB7_2xD_006
GCA_010023915.1	Burkholderiaceae		WB7_2xK_006
GCA_010023965.1	Burkholderiaceae		WB7_2xL_006
GCA_010025045.1	Burkholderiaceae		WB7_1C_019
GCA_010025075.1	Burkholderiaceae		WB7_1C_041
GCA_010025185.1	Burkholderiaceae		WB7_1B_035
GCA_010025705.1	Burkholderiaceae		WB9_1xJ_006
GCA_010025775.1	Burkholderiaceae		WB9_1xF_004
GCA_010025845.1	Burkholderiaceae		WB9_1xD_006
GCA_010026195.1	Burkholderiaceae		WB8_2xI_005
GCA_010026285.1	Burkholderiaceae		WB8_2xB_005
GCA_010026605.1	Burkholderiaceae		WB9_3_097
GCA_010026995.1	Burkholderiaceae		WB9_2_023
GCA_010027155.1	Burkholderiaceae		WB9_1xG_006
GCA_010027495.1	Burkholderiaceae		WB9_1xE_006
GCA_010028245.1	Burkholderiaceae		WB8_2xF_007
GCA_010030265.1	Burkholderiaceae		WB8_3_106
GCA_010030685.1	Burkholderiaceae		WBB_3_003
GCA_010031415.1	Burkholderiaceae		WBA_3_114
GCA_010031425.1	Burkholderiaceae		WBA_2_022
GCA_010032535.1	Burkholderiaceae		WB8_2xK_005
GCA_010032965.1	Burkholderiaceae		WB8_2xO_006
GCA_010033005.1	Burkholderiaceae		WB8_2xD_006
GCA_010033015.1	Burkholderiaceae		WB8_2xM_006
GCA_011525945.1	Burkholderiaceae		AOB1
GCA_012513675.1	Burkholderiaceae		AS06rmzACSIP_625
GCA_013316955.1	Burkholderiaceae		RACS_005
GCA_013336475.1	Burkholderiaceae		W4_Combined_metabat1_075
GCA_013360485.1	Burkholderiaceae		MAG_31
GCA_013360785.1	Burkholderiaceae		MAG_14
GCA_903642245.1	Burkholderiaceae		Lichen_MAGs_cladonia4
GCA_000463815.1	Burkholderiales		JGI 0001003-L21
GCA_000464075.2	Burkholderiales		JGI 0001003-J08
GCA_000464135.2	Burkholderiales		JGI 0001002-H06
GCA_000485515.1	Burkholderiales		JGI 0001003-A5
GCA_001603715.1	Burkholderiales		Beta_01
GCA_001770805.1	Burkholderiales		RIFCSPHIGHO2_12_FULL_65_48
GCA_001770965.1	Burkholderiales		RIFCSPLOWO2_12_FULL_67_210
GCA_001770985.1	Burkholderiales		RIFOXYC12_FULL_60_6
GCA_001771035.1	Burkholderiales		RIFOXYC2_FULL_59_8
GCA_001772095.1	Burkholderiales		RIFCSPHIGHO2_02_FULL_66_10
GCA_001772105.1	Burkholderiales		RIFCSPHIGHO2_12_63_9
GCA_001772135.1	Burkholderiales		RIFCSPHIGHO2_12_FULL_67_38
GCA_001772145.1	Burkholderiales		RIFCSPLOWO2_12_FULL_64_33
GCA_001772185.1	Burkholderiales		RIFOXYD2_FULL_59_8
GCA_002255705.1	Burkholderiales		21-58-4
GCA_002255955.1	Burkholderiales		PBB2
GCA_002256085.1	Burkholderiales		PBB5
GCA_002256095.1	Burkholderiales		PBB4
GCA_002279485.1	Burkholderiales		12-64-5
GCA_002281415.1	Burkholderiales		28-67-8
GCA_002282515.1	Burkholderiales		34-67-9
GCA_002342145.1	Burkholderiales		UBA2470
GCA_002470265.1	Burkholderiales		UBA7377
GCA_003152055.1	Burkholderiales		palsa_1002
GCA_003545215.1	Burkholderiales		UBA9276
GCA_003576795.1	Burkholderiales		PRO4
GCA_003818515.1	Burkholderiales		metabat2.76
GCA_004293765.1	Burkholderiales		PH2015_04D_56_11
GCA_004294355.1	Burkholderiales		PH2015_02U_56_5
GCA_005772715.1	Burkholderiales		F1-120-MAGs062
GCA_005773225.1	Burkholderiales		F1-120-MAGs018
GCA_005773285.1	Burkholderiales		F1-120-MAGs014
GCA_005773325.1	Burkholderiales		F1-120-MAGs010
GCA_005773395.1	Burkholderiales		F1-120-MAGs003
GCA_005773405.1	Burkholderiales		F1-120-MAGs004
GCA_005773415.1	Burkholderiales		F1-120-MAGs002
GCA_005773465.1	Burkholderiales		F1-120-MAGs001
GCA_005773495.1	Burkholderiales		F1-120-MAGs049
GCA_005776565.1	Burkholderiales		F1-120-MAGs235
GCA_005776595.1	Burkholderiales		F1-120-MAGs234
GCA_005776625.1	Burkholderiales		F1-120-MAGs233
GCA_005776785.1	Burkholderiales		F1-120-MAGs222
GCA_005777205.1	Burkholderiales		F1-120-MAGs184
GCA_005777245.1	Burkholderiales		F1-120-MAGs182
GCA_005778005.1	Burkholderiales		F1-120-MAGs112
GCA_005778155.1	Burkholderiales		F1-120-MAGs103
GCA_005778165.1	Burkholderiales		F1-120-MAGs102
GCA_005778205.1	Burkholderiales		F1-120-MAGs101
GCA_005778525.1	Burkholderiales		F1-120-MAGs189
GCA_005778645.1	Burkholderiales		F1-120-MAGs179
GCA_005778665.1	Burkholderiales		F1-120-MAGs178
GCA_005778885.1	Burkholderiales		F1-120-MAGs148
GCA_005779105.1	Burkholderiales		F1-120-MAGs114
GCA_005779125.1	Burkholderiales		F1-120-MAGs105
GCA_005779135.1	Burkholderiales		F1-120-MAGs106
GCA_005779165.1	Burkholderiales		F1-120-MAGs104
GCA_005779275.1	Burkholderiales		F1-120-MAGs092
GCA_005779515.1	Burkholderiales		F1-120-MAGs072
GCA_005786815.1	Burkholderiales		F1-20-MAGs208
GCA_005787095.1	Burkholderiales		F1-20-MAGs180
GCA_005787165.1	Burkholderiales		F1-20-MAGs170
GCA_005787225.1	Burkholderiales		F1-20-MAGs169
GCA_005787245.1	Burkholderiales		F1-20-MAGs168
GCA_005787255.1	Burkholderiales		F1-20-MAGs164
GCA_005787315.1	Burkholderiales		F1-20-MAGs163
GCA_005787885.1	Burkholderiales		F1-20-MAGs112
GCA_005787895.1	Burkholderiales		F1-20-MAGs111
GCA_005787945.1	Burkholderiales		F1-20-MAGs110
GCA_005787965.1	Burkholderiales		F1-20-MAGs109
GCA_005788225.1	Burkholderiales		F1-20-MAGs091
GCA_005788345.1	Burkholderiales		F1-20-MAGs209
GCA_005788425.1	Burkholderiales		F1-20-MAGs203
GCA_005788625.1	Burkholderiales		F1-20-MAGs181
GCA_005788965.1	Burkholderiales		F1-20-MAGs130
GCA_005789665.1	Burkholderiales		F1-20-MAGs048
GCA_005789685.1	Burkholderiales		F1-20-MAGs047
GCA_005789705.1	Burkholderiales		F1-20-MAGs049
GCA_005789745.1	Burkholderiales		F1-20-MAGs045
GCA_005789785.1	Burkholderiales		F1-20-MAGs046
GCA_005789935.1	Burkholderiales		F1-20-MAGs020
GCA_005789965.1	Burkholderiales		F1-20-MAGs021
GCA_005790325.1	Burkholderiales		F1-140-MAGs166
GCA_005790725.1	Burkholderiales		F1-140-MAGs131
GCA_005790745.1	Burkholderiales		F1-140-MAGs128
GCA_005790765.1	Burkholderiales		F1-140-MAGs127
GCA_005790965.1	Burkholderiales		F1-140-MAGs114
GCA_005791125.1	Burkholderiales		F1-20-MAGs081
GCA_005791295.1	Burkholderiales		F1-20-MAGs038
GCA_005791755.1	Burkholderiales		F1-140-MAGs165
GCA_005792055.1	Burkholderiales		F1-140-MAGs101
GCA_005792085.1	Burkholderiales		F1-140-MAGs100
GCA_005792555.1	Burkholderiales		F1-140-MAGs057
GCA_005792595.1	Burkholderiales		F1-140-MAGs056
GCA_005792905.1	Burkholderiales		F1-140-MAGs026
GCA_005793035.1	Burkholderiales		F1-140-MAGs021
GCA_005793045.1	Burkholderiales		F1-140-MAGs019
GCA_005793085.1	Burkholderiales		F1-140-MAGs020
GCA_005793105.1	Burkholderiales		F1-140-MAGs017
GCA_005793145.1	Burkholderiales		F1-140-MAGs014
GCA_005793645.1	Burkholderiales		F1-140-MAGs052
GCA_005793755.1	Burkholderiales		F1-140-MAGs027
GCA_005793795.1	Burkholderiales		F1-140-MAGs018
GCA_005797925.1	Burkholderiales		F1-80-MAGs029
GCA_005797945.1	Burkholderiales		F1-80-MAGs025
GCA_005797965.1	Burkholderiales		F1-80-MAGs024
GCA_005798095.1	Burkholderiales		F1-80-MAGs007
GCA_005798125.1	Burkholderiales		F1-80-MAGs008
GCA_005798515.1	Burkholderiales		F1-80-MAGs001
GCA_005799755.1	Burkholderiales		F1-60-MAGs088
GCA_005799945.1	Burkholderiales		F1-60-MAGs173
GCA_005799985.1	Burkholderiales		F1-60-MAGs151
GCA_005800685.1	Burkholderiales		F1-60-MAGs051
GCA_005800695.1	Burkholderiales		F1-60-MAGs048
GCA_005800795.1	Burkholderiales		F1-60-MAGs044
GCA_005800875.1	Burkholderiales		F1-60-MAGs033
GCA_005801055.1	Burkholderiales		F1-60-MAGs022
GCA_005801345.1	Burkholderiales		F1-60-MAGs049
GCA_005803965.1	Burkholderiales		F1-80-MAGs175
GCA_005804245.1	Burkholderiales		F1-80-MAGs151
GCA_005804585.1	Burkholderiales		F1-80-MAGs121
GCA_005804615.1	Burkholderiales		F1-80-MAGs119
GCA_005804685.1	Burkholderiales		F1-80-MAGs111
GCA_005804695.1	Burkholderiales		F1-80-MAGs112
GCA_005804755.1	Burkholderiales		F1-80-MAGs181
GCA_005809085.1	Burkholderiales		F1-80-MAGs061
GCA_006227785.1	Burkholderiales		M0107
GCA_008933335.1	Burkholderiales		SB36
GCA_009724965.1	Burkholderiales		D1FMe1.003
GCA_011327895.1	Burkholderiales		SpSt-400
GCA_011334805.1	Burkholderiales		SpSt-781
GCA_011390055.1	Burkholderiales		S20.Bin129
GCA_011390705.1	Burkholderiales		S09.Bin175
GCA_011391155.1	Burkholderiales		S06.Bin154
GCA_012273915.1	Burkholderiales		AHI25
GCA_012274045.1	Burkholderiales		AHI18
GCA_012799975.1	Burkholderiales		AS22ysBPME_216
GCA_013205525.1	Burkholderiales		bin.25
GCA_900290335.1	Burkholderiales		Peat
GCA_903643055.1	Burkholderiales		Lichen_MAGs_peltigera1
GCA_001636965.1	Paraburkholderia	kirstenboschensis	Rau
GCA_003849695.1	Paraburkholderia	tropica	BE15
