# Supplementary material for: The Hidden Genomic Diversity, Specialized Metabolite Capacity, and Revised Taxonomy of Burkholderia Sensu Lato
Source: Front Microbiol. 2021 Sep 22;12:726847. doi: 10.3389/fmicb.2021.726847 (PMC8506256; doi:10.3389/fmicb.2021.726847)
Supplement: Supplementary file 3 [file Table_2.xlsx]

## Sheet: Table S1
Table S2. Type strains of named Burkholderia sensu lato species
Genus	Species	Strain	No. of Genomes	Accession	Type Strain	Name Validity
Burkholderia	aenigmatica	LMG 13014	10	CABVQC010000000	Y	Y
Burkholderia	paludis	LMG 30113/MSh1	4	GCA_902859865.1	Y	N
Burkholderia	ambifaria	AMMD	71	GCA_000203915.1	Y	Y
Burkholderia	anthina	LMG 20980	19	GCA_902830395.1	Y	Y
Burkholderia	arboris	LMG 24066	3	GCA_902499125.1	Y	Y
Burkholderia	catarinensis	89	1	GCA_001883705.1	Y	Y
Burkholderia	cenocepacia	J2315	246	GCA_000009485.1	Y	Y
Burkholderia	cepacia	ATCC 25416	175	GCA_001411495.1	Y	Y
Burkholderia	contaminans	LMG 23361	62	GCA_001758385.2	Y	Y
Burkholderia	diffusa	CCUG 54558	17	GCA_008802145.1	Y	Y
Burkholderia	dolosa	LMG 24066	9	GCA_902499135.1	Y	Y
Burkholderia	gladioli	ATCC 10248	247	GCA_000959725.1	Y	Y
Burkholderia	glumae	ATCC 33617	13	GCA_000960995.1	Y	Y
Burkholderia	humptydooensis	MSMB43	11	GCA_000266985.1	Y	Y
Burkholderia	lata	383	9	GCA_000012945.1	Y	Y
Burkholderia	latens	LMG 24064	4	GCA_902832795.1	Y	Y
Burkholderia	mallei	ATCC 23344	83	GCA_000011705.1	Y	Y
Burkholderia	metallica	LMG 24068	6	GCA_902832845.1	Y	Y
Burkholderia	multivorans	ATCC BAA-247	219	GCA_000959525.1	Y	Y
Burkholderia	oklahomensis	LMG 23618	13	GCA_900608545.1	Y	Y
Burkholderia	plantarii	LMG 9035	4	GCA_902832905.1	Y	Y
Burkholderia	pseudomallei	ATCC 23343	1624	GCA_001182285.1	Y	Y
Burkholderia	pseudomultivorans	LMG 26883	12	GCA_902499075.1	Y	Y
Burkholderia	puraquae	CAMPA 1040	2	GCA_002099195.1	Y	Y
Burkholderia	pyrrocinia	DSM 10685	18	GCA_001028665.1	Y	Y
Burkholderia	seminalis	LMG 24067	9	GCA_902832885.1	Y	Y
Burkholderia	singularis	LMG 28154	4	GCA_900176645.1	Y	Y
Burkholderia	stabilis	ATCC BAA-67	6	GCA_001742165.1	Y	Y
Burkholderia	stagnalis	LMG 28156	113	GCA_902830275.1	Y	Y
Burkholderia	territorii	LMG 28158	48	GCA_902833055.1	Y	Y
Burkholderia	thailandensis	ATCC 700388	51	GCA_000012365.1	Y	Y
Burkholderia	ubonensis	LMG 20358	307	GCA_902833085.1	Y	Y
Burkholderia	vietnamiensis	LMG 10929	91	GCA_000959445.1	Y	Y
Caballeronia	novacaledonica	LMG 28615	1	GCA_900258035.1	Y	Y
Caballeronia	arationis	LMG 29324	2	GCA_001544975.2	Y	Y
Caballeronia	arvi	LMG 29317	1	GCA_001544695.2	Y	Y
Caballeronia	calidae	LMG 29322	1	GCA_001544875.2	Y	Y
Caballeronia	catudaia	LMG 29318	1	GCA_001544755.2	Y	Y
Caballeronia	choica	LMG 22940	1	GCA_001544535.2	Y	Y
Caballeronia	concitans	LMG 29315	2	GCA_001544615.2	Y	Y
Caballeronia	cordobensis	LMG 27620	5	GCA_001544575.2	Y	Y
Caballeronia	fortuita	LMG 29321	1	GCA_900044055.2	Y	Y
Caballeronia	glathei	LMG 14190	4	GCA_000751215.2	Y	Y
Caballeronia	glebae	LMG 29325	1	GCA_001545035.2	Y	Y
Caballeronia	grimmiae	R27	2	GCA_000698555.1	Y	Y
Caballeronia	humi	LMG 22934	2	GCA_001544475.2	Y	Y
Caballeronia	hypogeia	LMG 29319	1	GCA_001544795.2	Y	Y
Caballeronia	insecticola	RPE64	1	GCA_000402035.1	Y	Y
Caballeronia	jiangsuensis	MP-1	2	GCA_000648925.1	Y	Y
Caballeronia	megalochromosomata	JC2949	1	GCA_001580565.1	Y	Y
Caballeronia	mineralivorans	LMG 29910	4	GCA_001028175.1	Y	Y
Caballeronia	pedi	LMG 29323	2	GCA_001544915.2	Y	Y
Caballeronia	peredens	LMG 29314	1	GCA_001544595.2	Y	Y
Caballeronia	ptereochthonis	LMG 29326	1	GCA_001545075.2	Y	Y
Caballeronia	sordidicola	LMG 22029	1	GCA_001544455.2	Y	Y
Caballeronia	telluris	LMG 22936	2	GCA_001544495.2	Y	Y
Caballeronia	temeraria	LMG 29319	1	GCA_001544795.2	Y	Y
Caballeronia	terrestris	LMG 22937	1	GCA_001544515.2	Y	Y
Caballeronia	turbans	LMG 29316	1	GCA_001544655.2	Y	Y
Caballeronia	udeis	LMG 27134	8	GCA_001544555.2	Y	Y
Caballeronia	zhejiangensis	OP-1	4	GCA_000698575.1	Y	Y
Mycetohabitans	endofungorum	HKI 456	1	GCA_002927045.1	Y	Y
Mycetohabitans	rhizoxinica	HKI 454	1	GCA_000198775.1	Y	Y
Paraburkholderia	bonniea	BbQS859	1	GCA_009455625.1	Y	N
Paraburkholderia	caffeinitolerans	LMG 28688	2	GCA_902859945.1	Y	N
Paraburkholderia	ginsengisoli	NBRC 100965	1	GCA_000739735.1	Y	Y
Paraburkholderia	guartelaensis	CNPSo 3008	1	GCA_004353905.1	Y	N
Paraburkholderia	hayleyella	BhQS11	1	GCA_009455685.1	Y	N
Paraburkholderia	lacunae	S27	1	GCA_003353175.1	Y	Y
Paraburkholderia	lycopersici	TNe-862	1	GCA_900096975.1	Y	N
Paraburkholderia	youngii	JPY169	5	GCA_013366925.1	Y	Y
Paraburkholderia	atlantica	CNPSo 3155	7	GCA_009362785.1	Y	N
Paraburkholderia	franconis	CNPSo 3157	1	GCA_009362735.1	Y	N
Paraburkholderia	acidipaludis	NBRC 101816	1	GCA_000684975.1	Y	Y
Paraburkholderia	aromaticivorans	BN5	1	GCA_002278075.1	Y	Y
Paraburkholderia	aspalathi	LMG 27731	2	GCA_900116445.1	Y	Y
Paraburkholderia	azotifigens	NF 2-5-3	2	GCA_007995085.1	Y	Y
Paraburkholderia	bannensis	NBRC 103871	1	GCA_000685015.1	Y	Y
Paraburkholderia	bryophila	LMG 23644	3	GCA_902833525.1	Y	Y
Paraburkholderia	caballeronis	LMG 26416	9	GCA_900109675.1	Y	Y
Paraburkholderia	caffeinilytica	LMG 28690	3	GCA_902859905.1	Y	Y
Paraburkholderia	caledonica	LMG 19076	4	GCA_902833635.1	Y	Y
Paraburkholderia	caribensis	LMG 18531	9	GCA_902833515.1	Y	Y
Paraburkholderia	diazotrophica	LMG 26031	1	GCA_900108945.1	Y	Y
Paraburkholderia	dilworthii	WSM3556	1	GCA_000472525.1	Y	Y
Paraburkholderia	dipogonis	ICMP 19430	1	GCA_004402975.1	Y	Y
Paraburkholderia	eburnea	JCM 18070	3	GCA_002917095.1	Y	Y
Paraburkholderia	ferrariae	NBRC 106233	1	GCA_000685035.1	Y	Y
Paraburkholderia	fungorum	LMG 16225	12	GCA_902833645.1	Y	Y
Paraburkholderia	fynbosensis	LMG 27177	2	GCA_902859935.1	Y	Y
Paraburkholderia	ginsengiterrae	DCY85	2	GCA_001645125.1	Y	Y
Paraburkholderia	graminis	LMG 18924	11	GCA_902859785.1	Y	Y
Paraburkholderia	heleia	NBRC 101817	6	GCA_000739775.1	Y	Y
Paraburkholderia	hospita	LMG 20598	14	GCA_902833685.1	Y	Y
Paraburkholderia	humisilvae	LMG 29542	1	GCA_902859855.1	Y	Y
Paraburkholderia	kirstenboschensis	KB15	1	GCA_001636975.1	Y	Y
Paraburkholderia	kururiensis	LMG 19447	4	GCA_902833705.1	Y	Y
Paraburkholderia	madseniana	RP11	2	GCA_009690905.1	Y	Y
Paraburkholderia	megapolitana	LMG 23650	2	GCA_900113825.1	Y	Y
Paraburkholderia	mimosarum	LMG 23256	4	GCA_902833725.1	Y	Y
Paraburkholderia	monticola	JC2948	1	GCA_001580545.1	Y	Y
Paraburkholderia	nodosa	DSM 21604	1	GCA_000519185.1	Y	Y
Paraburkholderia	oxyphila	NBRC 105797	2	GCA_000685075.1	Y	Y
Paraburkholderia	phenazinium	LMG 2247	3	GCA_900100735.1	Y	Y
Paraburkholderia	phenoliruptrix	LMG 22037	7	GCA_902833655.1	Y	Y
Paraburkholderia	phosphatilytica	7QSK02	1	GCA_003443895.1	Y	Y
Paraburkholderia	phymatum	LMG 21445	2	GCA_902833665.1	Y	Y
Paraburkholderia	phytofirmans	PsJN	1	GCA_000020125.1	Y	Y
Paraburkholderia	piptadeniae	STM 7183	1	GCA_900007165.2	Y	Y
Paraburkholderia	rhizosphaerae	LMG 29544	1	GCA_004366595.1	Y	Y
Paraburkholderia	rhynchosiae	LMG 27174	2	GCA_902859775.1	Y	Y
Paraburkholderia	ribeironis	STM 7296	1	GCA_900019265.2	Y	Y
Paraburkholderia	sacchari	LMG 19450	2	GCA_902833715.1	Y	Y
Paraburkholderia	sartisoli	LMG 24000	2	GCA_900107685.1	Y	Y
Paraburkholderia	sediminicola	LMG 24238	1	GCA_902859805.1	Y	Y
Paraburkholderia	solisilvae	LMG 29739	1	GCA_902859875.1	Y	Y
Paraburkholderia	sprentiae	WSM5005	2	GCA_001865575.1	Y	Y
Paraburkholderia	steynii	HC1.1ba	1	GCA_004334975.1	Y	Y
Paraburkholderia	strydomiana	WK1.1f	4	GCA_004334935.1	Y	Y
Paraburkholderia	susongensis	LMG 29540	1	GCA_900177725.1	Y	Y
Paraburkholderia	terrae	NBRC 100964	3	GCA_000739835.1	Y	Y
Paraburkholderia	terricola	LMG 20594	6	GCA_902833815.1	Y	Y
Paraburkholderia	tropica	LMG 22274	13	GCA_902833865.1	Y	Y
Paraburkholderia	tuberum	LMG 21444	13	GCA_902833905.1	Y	Y
Paraburkholderia	ultramafica	LMG 28614	1	GCA_902859915.1	Y	Y
Paraburkholderia	xenovorans	LB400	3	GCA_000013645.1	Y	Y
Paraburkholderia	agricolaris	BaQS159	1	GCA_009455635.1	Y	Y
Pararobbsia	alpina	LMG 28138	1	GCA_902859895.1	Y	Y
Pararobbsia	silviterrae	DHC34	1	GCA_003628125.1	Y	Y
Robbsia	andropogonis	LMG 2129	3	GCA_902833845.1	Y	Y
Trinickia	caryophylli	LMG 2155	5	GCA_902833925.1	Y	Y
Trinickia	dabaoshanensis	LMG 30479	1	GCA_002879885.1	Y	Y
Trinickia	dinghuensis	LMG 30259	1	GCA_003367175.1	Y	Y
Trinickia	fusca	7MK8-2	1	GCA_003628145.1	Y	Y
Trinickia	soli	LMG 24076	3	GCA_902859815.1	Y	Y
Trinickia	symbiotica	JPY-345	4	GCA_002934455.1	Y	Y
Trinickia	diaoshuihuensis	NEAU-SY24	1	GCA_003390925.1	Y	Y
