# Supplementary material for: The Hidden Genomic Diversity, Specialized Metabolite Capacity, and Revised Taxonomy of Burkholderia Sensu Lato
Source: Front Microbiol. 2021 Sep 22;12:726847. doi: 10.3389/fmicb.2021.726847 (PMC8506256; doi:10.3389/fmicb.2021.726847)
Supplement: Supplementary file 4 [file Table_3.xlsx]

## Sheet: Table S2
Table S3. Proxy type strains and re-classification of undefined Burkholderia sensu lato species
New Genus	Species	Strain	No. of Genomes	Accession	Original Genus	Original Species
Burkholderia	novel_017	RZ2MS16	2	GCA_001443045.1	Burkholderia	ambifaria
Burkholderia	novel_010	AZ-4-2-10-S1-D7	13	GCA_001547525.1	Burkholderia	anthina
Burkholderia	novel_007	VC7848	56	GCA_001999785.1	Burkholderia	cenocepacia
Burkholderia	novel_008	YG-3	23	GCA_003966315.1	Burkholderia	cenocepacia
Burkholderia	novel_009	Bu72	18	GCA_000504665.1	Burkholderia	cepacia
Burkholderia	novel_019	GG4	1	GCA_000292915.1	Burkholderia	cepacia
Burkholderia	novel_022	MSMB1184WGS	1	GCA_001718835.1	Burkholderia	cepacia
Burkholderia	novel_002	R-18110	5	GCA_902499335.1	Burkholderia	lata
Burkholderia	novel_003	LMG 23254	2	GCA_902499025.1	Burkholderia	lata
Burkholderia	novel_021	AU17928	3	GCA_001718795.1	Burkholderia	latens
Burkholderia	novel_005	mHSR5	1	GCA_003330765.1	Burkholderia	pyrrocinia
Burkholderia	novel_001		1	GCA_011605345.1	Burkholderia	sp. D-99
Burkholderia	novel_004		2	GCA_902833045.1	Burkholderia	sp. BCC0322
Burkholderia	novel_011		2	GCA_902833145.1	Burkholderia	sp. BCC0506
Burkholderia	novel_012		1	GCA_902833225.1	Burkholderia	sp. BCC1644
Burkholderia	novel_013		1	GCA_003853705.1	Burkholderia	sp. Bp8992
Burkholderia	novel_015		15	GCA_000949135.2	Burkholderia	sp. USM B20
Burkholderia	novel_016		2	GCA_003853415.1	Burkholderia	sp. Bp9142
Burkholderia	novel_018		2	GCA_003854235.1	Burkholderia	sp. Bp8998
Burkholderia	novel_020		1	GCA_003635165.1	Burkholderia	sp. Nafp2/4-1b
Burkholderia	novel_024		1	GCA_004343775.1	Burkholderia	sp. SRS-46
Burkholderia	novel_025		1	GCA_003854275.1	Burkholderia	sp. Bp8963
Burkholderia	novel_026		1	GCA_000687455.2	Burkholderia	sp. lig30
Burkholderia	novel_027		1	GCA_013403875.1	Burkholderia	sp. DHOM02
Burkholderia	novel_028		1	GCA_001522865.1	Burkholderia	sp. TSV86
Burkholderia	novel_036		11	GCA_001524445.2	Burkholderia	sp. MSMB0266
Burkholderia	novel_006	EB159	2	GCA_004125865.1	Burkholderia	stabilis
Burkholderia	novel_023	MSMB0783	1	GCA_001718695.1	Burkholderia	ubonensis
Caballeronia	novel_092	PAMC 26633	1	GCA_002220365.1	Caballeronia	sordidicola
Caballeronia	novel_093	S170	1	GCA_000729995.1	Caballeronia	sordidicola
Caballeronia	novel_089		1	GCA_902506145.1	Burkholderia	sp. 8Y
Caballeronia	novel_090		1	GCA_902833455.1	Caballeronia	sp. BCC1704
Caballeronia	novel_091		1	GCA_009766085.1	Burkholderia	sp. S171
Caballeronia	novel_094		2	GCA_011493005.1	Caballeronia	sp. SBC1
Caballeronia	novel_095		5	GCA_001577465.1	Burkholderia	sp. PAMC 28687
Caballeronia	novel_096		1	GCA_001424345.1	Burkholderia	sp. Leaf177
Candidatus Caballeronia	novel_108	UZHbot1	2	GCA_000234195.1	Candidatus Paraburkholderia	kirkii
Candidatus Caballeronia	novel_109	UZHbot2	1	GCA_001189345.1	Candidatus Paraburkholderia	kirkii
Mycetohabitans	novel_102		2	GCA_900155955.1	Burkholderia	sp. b13
Paraburkholderia	novel_054	AR20-38	1	GCA_012689525.1	Paraburkholderia	aromaticivorans
Paraburkholderia	novel_050	WP4_2_2	2	GCA_014200455.1	Paraburkholderia	bannensis
Paraburkholderia	novel_058	H2C3B	6	GCA_013408935.1	Paraburkholderia	bryophila
Paraburkholderia	novel_107	M3D6B	4	GCA_013410765.1	Paraburkholderia	bryophila
Paraburkholderia	novel_051	ES3-20	1	GCA_003610895.1	Paraburkholderia	fungorum
Paraburkholderia	novel_063	GAS106B	1	GCA_900099835.1	Paraburkholderia	fungorum
Paraburkholderia	novel_040	HAMBI 2494	1	GCA_003350035.1	Paraburkholderia	kururiensis
Paraburkholderia	novel_032	CNPSo 1341	1	GCA_001718195.1	Paraburkholderia	nodosa
Paraburkholderia	novel_068	ES_PA-B3	3	GCA_004365055.1	Paraburkholderia	phenazinium
Paraburkholderia	novel_069	GAS86	1	GCA_900141745.1	Paraburkholderia	phenazinium
Paraburkholderia	novel_070	GAS95	1	GCA_900142845.1	Paraburkholderia	phenazinium
Paraburkholderia	novel_043	ES_PA-E9	6	GCA_004363325.1	Paraburkholderia	sediminicola
Paraburkholderia	novel_029		1	GCA_014397785.1	Paraburkholderia	sp. WC7.3b
Paraburkholderia	novel_033		1	GCA_009789655.1	Paraburkholderia	sp. 7Q-K02
Paraburkholderia	novel_035		1	GCA_009789675.1	Paraburkholderia	sp. DHF22
Paraburkholderia	novel_037		1	GCA_011753055.1	Burkholderia	sp. Ax-1719
Paraburkholderia	novel_038		2	GCA_004298475.1	Paraburkholderia	sp. FW106_bin.8
Paraburkholderia	novel_039		1	GCA_003837865.1	Paraburkholderia	sp. DHOA04
Paraburkholderia	novel_041		1	GCA_002870125.1	Burkholderia	sp. WAC0059
Paraburkholderia	novel_042		1	GCA_003253405.1	Paraburkholderia	sp. PDC91
Paraburkholderia	novel_044		1	GCA_013177695.1	Paraburkholderia	sp. 1N
Paraburkholderia	novel_045		1	GCA_012927345.1	Paraburkholderia	sp. RP-4-7
Paraburkholderia	novel_046		1	GCA_013177735.1	Paraburkholderia	sp. 5N
Paraburkholderia	novel_047		1	GCA_001634365.1	Burkholderia	sp. OLGA172
Paraburkholderia	novel_048		1	GCA_003610295.1	Paraburkholderia	sp. BL23I1N1
Paraburkholderia	novel_049		1	GCA_900230185.1	Burkholderia	sp. OK233
Paraburkholderia	novel_053		5	GCA_004366535.1	Paraburkholderia	sp. BL6665CI2N2
Paraburkholderia	novel_055		1	GCA_004339745.1	Paraburkholderia	sp. BL9I2N2
Paraburkholderia	novel_056		2	GCA_000178415.2	Burkholderia	sp. Ch1-1
Paraburkholderia	novel_057		1	GCA_900104795.1	Burkholderia	sp. WP9
Paraburkholderia	novel_059		1	GCA_002973525.1	Paraburkholderia	sp. BL21I4N1
Paraburkholderia	novel_060		1	GCA_900996225.1	Paraburkholderia	sp. BCC1884
Paraburkholderia	novel_061		1	GCA_012275575.1	Burkholderia	sp. SG-MS1
Paraburkholderia	novel_062		1	GCA_008369935.1	Paraburkholderia	sp. DCY113
Paraburkholderia	novel_064		1	GCA_900996245.1	Paraburkholderia	sp. BCC1886
Paraburkholderia	novel_065		1	GCA_000148685.1	Burkholderia	sp. CCGE1003
Paraburkholderia	novel_066		1	GCA_000472545.1	Burkholderia	sp. WSM2232
Paraburkholderia	novel_067		1	GCA_000472445.1	Burkholderia	sp. WSM2230
Paraburkholderia	novel_071		1	GCA_900996235.1	Paraburkholderia	sp. BCC1885
Paraburkholderia	novel_072		1	GCA_005503145.1	Burkholderia	sp. 4M9327F10
Paraburkholderia	novel_073		1	GCA_003429005.1	Paraburkholderia	sp. DHOC27
Paraburkholderia	novel_076		1	GCA_004197395.1	Paraburkholderia	sp. UYCP14C
Paraburkholderia	novel_077		1	GCA_000173575.1	Burkholderia	sp. H160
Paraburkholderia	novel_078		1	GCA_001931485.1	Burkholderia	sp. SRS-W-2-2016
Paraburkholderia	novel_079		1	GCA_012927125.1	Paraburkholderia	sp. G-4-1-8
Paraburkholderia	novel_080		2	GCA_011752995.1	Burkholderia	sp. Ax-1724
Paraburkholderia	novel_081		1	GCA_004361815.1	Paraburkholderia	sp. BL10I2N1
Paraburkholderia	novel_082		1	GCA_013426915.1	Paraburkholderia	sp. PGU19
Paraburkholderia	novel_083		1	GCA_013426895.1	Paraburkholderia	sp. PGU16
Paraburkholderia	novel_084		1	GCA_003121405.1	Paraburkholderia	sp. C35
Paraburkholderia	novel_085		1	GCA_001319865.1	Burkholderia	sp. E7m39
Paraburkholderia	novel_087		1	GCA_001922345.1	Paraburkholderia	sp. SOS3
Paraburkholderia	novel_088		1	GCA_004359985.1	Paraburkholderia	sp. LD6
Paraburkholderia	novel_099		1	GCA_003001875.1	Paraburkholderia	sp. BL18I3N2
Paraburkholderia	novel_106	SCZa-39	2	GCA_003096875.1	Paraburkholderia	unamae
Trinickia	novel_030		1	GCA_005280735.1	Burkholderia	sp. DHOD12
Trinickia	novel_031		1	GCA_005144415.1	Trinickia	sp. 7GSK02
Trinickia	novel_097		1	GCA_004322045.1	Paraburkholderia	sp. FW106_bin.13
Trinickia	novel_100		1	GCA_013282575.1	Paraburkholderia	sp. NMBU_R16
