# Supplementary material for: The Hidden Genomic Diversity, Specialized Metabolite Capacity, and Revised Taxonomy of Burkholderia Sensu Lato
Source: Front Microbiol. 2021 Sep 22;12:726847. doi: 10.3389/fmicb.2021.726847 (PMC8506256; doi:10.3389/fmicb.2021.726847)
Supplement: Supplementary file 5 [file Table_4.xlsx]

## Sheet: Table S3
Table S4. Genome assembly accessions and their re-classified taxonomy
Accession	ENA genus	ENA species	New genus	New species	Same genus as ENA	Same species as ENA
GCA_001294705	Burkholderia	sp. ST111	Paraburkholderia	aspalathi	N	N
GCA_000519245	Burkholderia	sp. UYPR1.413	Paraburkholderia	azotifigens	N	N
GCA_002220305	Burkholderia	sp. AD24	Paraburkholderia	bryophila	N	N
GCA_001319905	Burkholderia	sp. E7m48	Paraburkholderia	caribensis	N	N
GCA_000818655	Burkholderia	sp. MR1	Caballeronia	concitans	N	N
GCA_001988975	Burkholderia	sp. KK1	Caballeronia	cordobensis	N	N
GCA_000828875	Burkholderia	sp. RPE67	Caballeronia	cordobensis	N	N
GCA_000236065	Burkholderia	sp. YI23	Caballeronia	cordobensis	N	N
GCA_007474635	Caballeronia	humi	Paraburkholderia	eburnea	N	N
GCA_000714855	Burkholderia	sp. K24	Paraburkholderia	fungorum	N	N
GCA_004339005	Paraburkholderia	sp. BL8N3	Caballeronia	glathei	N	N
GCA_001293045	Burkholderia	sp. HB1	Paraburkholderia	graminis	N	N
GCA_000421865	Burkholderia	sp. URHA0054	Paraburkholderia	graminis	N	N
GCA_000281995	Burkholderia	sp. BT03	Paraburkholderia	hospita	N	N
GCA_900168075	Burkholderia	sp. CF099	Paraburkholderia	hospita	N	N
GCA_002245905	Burkholderia	sp. CF145	Paraburkholderia	hospita	N	N
GCA_900230235	Burkholderia	sp. YR290	Paraburkholderia	hospita	N	N
GCA_003269235	Burkholderia	sp. yr520	Caballeronia	humi	N	N
GCA_005280735	Burkholderia	sp. DHOD12	Trinickia	novel.030	N	N
GCA_011753055	Burkholderia	sp. Ax-1719	Paraburkholderia	novel.037	N	N
GCA_002870125	Burkholderia	sp. WAC0059	Paraburkholderia	novel.041	N	N
GCA_900142905	Burkholderia	sp. GAS332	Paraburkholderia	novel.043	N	N
GCA_009765935	Burkholderia	sp. S1	Paraburkholderia	novel.043	N	N
GCA_900230185	Burkholderia	sp. OK233	Paraburkholderia	novel.049	N	N
GCA_000178415	Burkholderia	sp. Ch1-1	Paraburkholderia	novel.056	N	N
GCA_900104795	Burkholderia	sp. WP9	Paraburkholderia	novel.057	N	N
GCA_000745015	Burkholderia	sp. 9120	Paraburkholderia	novel.058	N	N
GCA_012275575	Burkholderia	sp. SG-MS1	Paraburkholderia	novel.061	N	N
GCA_000148685	Burkholderia	sp. CCGE1003	Paraburkholderia	novel.065	N	N
GCA_000472545	Burkholderia	sp. WSM2232	Paraburkholderia	novel.066	N	N
GCA_000472445	Burkholderia	sp. WSM2230	Paraburkholderia	novel.067	N	N
GCA_005503145	Burkholderia	sp. 4M9327F10	Paraburkholderia	novel.072	N	N
GCA_000173575	Burkholderia	sp. H160	Paraburkholderia	novel.077	N	N
GCA_001931485	Burkholderia	sp. SRS-W-2-2016	Paraburkholderia	novel.078	N	N
GCA_011752995	Burkholderia	sp. Ax-1724	Paraburkholderia	novel.080	N	N
GCA_001319865	Burkholderia	sp. E7m39	Paraburkholderia	novel.085	N	N
GCA_902506145	Burkholderia	sp. 8Y	Caballeronia	novel.089	N	N
GCA_009766085	Burkholderia	sp. S171	Caballeronia	novel.091	N	N
GCA_001557535	Burkholderia	sp. PAMC	Caballeronia	novel.095	N	N
GCA_001577465	Burkholderia	sp. PAMC	Caballeronia	novel.095	N	N
GCA_001424345	Burkholderia	sp. Leaf177	Caballeronia	novel.096	N	N
GCA_004322045	Paraburkholderia	sp.	Trinickia	novel.097	N	N
GCA_013282575	Paraburkholderia	sp. NMBU_R16	Trinickia	novel.100	N	N
GCA_900155955	Burkholderia	sp. b13	Mycetohabitans	novel.102	N	N
GCA_900156195	Burkholderia	sp. b14	Mycetohabitans	novel.102	N	N
GCA_000234195	Candidatus Paraburkholderia	kirkii	Caballeronia	novel.108	N	N
GCA_001189335	Candidatus Paraburkholderia	schumannianae	Caballeronia	novel.108	N	N
GCA_001189345	Candidatus Paraburkholderia	kirkii	Caballeronia	novel.109	N	N
GCA_009938265	Burkholderia	sp. THE68	Caballeronia	pedi	N	N
GCA_000176935	Burkholderia	sp. CCGE1001	Paraburkholderia	phenoliruptrix	N	N
GCA_000515195	Burkholderia	sp. JPY366	Paraburkholderia	phenoliruptrix	N	N
GCA_008329465	Paraburkholderia	sp. T12-10	Trinickia	soli	N	N
GCA_002196005	Burkholderia	sp. Bk	Paraburkholderia	strydomiana	N	N
GCA_003097055	Paraburkholderia	sp. OV555	Caballeronia	telluris	N	N
GCA_007829195	Burkholderia	sp. 604	Paraburkholderia	terricola	N	N
GCA_002087245	Burkholderia	sp. A27	Paraburkholderia	terricola	N	N
GCA_900215135	Burkholderia	sp. D7	Caballeronia	udeis	N	N
GCA_000256585	Burkholderia	sp. SJ98	Caballeronia	zhejiangensis	N	N
GCA_002223275	Burkholderia	sp. AU17325	Burkholderia	aenigmatica	Y	N
GCA_903879175	Burkholderia	sp. AU31652	Burkholderia	aenigmatica	Y	N
GCA_902833005	Burkholderia	sp. BCC0217	Burkholderia	aenigmatica	Y	N
GCA_000724975	Burkholderia	cepacia	Burkholderia	aenigmatica	Y	N
GCA_003711145	Burkholderia	lata	Burkholderia	aenigmatica	Y	N
GCA_902499175	Burkholderia	lata	Burkholderia	aenigmatica	Y	N
GCA_902499235	Burkholderia	lata	Burkholderia	aenigmatica	Y	N
GCA_902499275	Burkholderia	lata	Burkholderia	aenigmatica	Y	N
GCA_902499295	Burkholderia	lata	Burkholderia	aenigmatica	Y	N
GCA_902500525	Burkholderia	lata	Burkholderia	aenigmatica	Y	N
GCA_005937855	Burkholderia	sp. KBS0801	Burkholderia	ambifaria	Y	N
GCA_011753085	Burkholderia	sp. Tr-862	Burkholderia	ambifaria	Y	N
GCA_003857765	Burkholderia	sp. Bp9016	Burkholderia	anthina	Y	N
GCA_003858015	Burkholderia	sp. Bp9017	Burkholderia	anthina	Y	N
GCA_002355095	Burkholderia	sp. IDO3	Burkholderia	anthina	Y	N
GCA_003366075	Burkholderia	sp. IDO3	Burkholderia	anthina	Y	N
GCA_002563755	Burkholderia	sp. JKS000303	Burkholderia	anthina	Y	N
GCA_000701165	Burkholderia	cepacia	Burkholderia	arboris	Y	N
GCA_003286395	Paraburkholderia	dokdonella	Paraburkholderia	caffeinitolerans	Y	N
GCA_003201235	Paraburkholderia	sp. OV446	Paraburkholderia	caledonica	Y	N
GCA_900044055	Caballeronia	fortuita	Caballeronia	calidae	Y	N
GCA_003253915	Burkholderia	sp. 28_3	Burkholderia	cenocepacia	Y	N
GCA_000755805	Burkholderia	cepacia	Burkholderia	cenocepacia	Y	N
GCA_000757365	Burkholderia	cepacia	Burkholderia	cenocepacia	Y	N
GCA_000877315	Burkholderia	cepacia	Burkholderia	cenocepacia	Y	N
GCA_000466765	Burkholderia	sp. AU4i	Burkholderia	cepacia	Y	N
GCA_003573655	Burkholderia	sp. HAN2018	Burkholderia	cepacia	Y	N
GCA_001043615	Burkholderia	sp. LK4	Burkholderia	cepacia	Y	N
GCA_004803625	Burkholderia	sp. LS-044	Burkholderia	cepacia	Y	N
GCA_001038745	Burkholderia	lata	Burkholderia	cepacia	Y	N
GCA_003294055	Burkholderia	reimsis	Burkholderia	cepacia	Y	N
GCA_002151255	Burkholderia	territorii	Burkholderia	cepacia	Y	N
GCA_005503135	Burkholderia	sp. 4M9327G5	Burkholderia	contaminans	Y	N
GCA_005502665	Burkholderia	sp. 4NA327B6	Burkholderia	contaminans	Y	N
GCA_005503435	Burkholderia	sp. 4NA327C10	Burkholderia	contaminans	Y	N
GCA_005502655	Burkholderia	sp. 4NA327C6	Burkholderia	contaminans	Y	N
GCA_011753045	Burkholderia	sp. Ap-955	Burkholderia	contaminans	Y	N
GCA_002223325	Burkholderia	sp. AU15512	Burkholderia	contaminans	Y	N
GCA_002223205	Burkholderia	sp. AU27893	Burkholderia	contaminans	Y	N
GCA_002223155	Burkholderia	sp. AU31652	Burkholderia	contaminans	Y	N
GCA_002223135	Burkholderia	sp. AU33423	Burkholderia	contaminans	Y	N
GCA_002223125	Burkholderia	sp. AU33647	Burkholderia	contaminans	Y	N
GCA_002223095	Burkholderia	sp. AU33803	Burkholderia	contaminans	Y	N
GCA_002223365	Burkholderia	sp. AU6039	Burkholderia	contaminans	Y	N
GCA_011753145	Burkholderia	sp. Ax-1735	Burkholderia	contaminans	Y	N
GCA_001719665	Burkholderia	sp. CQ001	Burkholderia	contaminans	Y	N
GCA_002223055	Burkholderia	sp. HI2500	Burkholderia	contaminans	Y	N
GCA_002223085	Burkholderia	sp. HI2714	Burkholderia	contaminans	Y	N
GCA_002223045	Burkholderia	sp. HI4860	Burkholderia	contaminans	Y	N
GCA_004343765	Burkholderia	sp. SRS-25	Burkholderia	contaminans	Y	N
GCA_011753135	Burkholderia	sp. Tr-849	Burkholderia	contaminans	Y	N
GCA_902500395	Burkholderia	cenocepacia	Burkholderia	contaminans	Y	N
GCA_001718575	Burkholderia	lata	Burkholderia	contaminans	Y	N
GCA_902833165	Burkholderia	sp. BCC1630	Burkholderia	diffusa	Y	N
GCA_902833195	Burkholderia	sp. BCC1638	Burkholderia	diffusa	Y	N
GCA_902833125	Burkholderia	sp. BCC1640	Burkholderia	diffusa	Y	N
GCA_003858025	Burkholderia	sp. Bp9004	Burkholderia	diffusa	Y	N
GCA_003853825	Burkholderia	sp. Bp9012	Burkholderia	diffusa	Y	N
GCA_001524185	Burkholderia	sp. FL-7-2-10-S1-D7	Burkholderia	diffusa	Y	N
GCA_001523915	Burkholderia	sp. LA-2-3-30-S1-D2	Burkholderia	diffusa	Y	N
GCA_001524645	Burkholderia	sp. MSMB0856	Burkholderia	diffusa	Y	N
GCA_001522185	Burkholderia	sp. RF2-non_BP3	Burkholderia	diffusa	Y	N
GCA_001521985	Burkholderia	sp. RF4-BP95	Burkholderia	diffusa	Y	N
GCA_001522425	Burkholderia	sp. RF7-non_BP1	Burkholderia	diffusa	Y	N
GCA_001521935	Burkholderia	sp. RF7-non_BP4	Burkholderia	diffusa	Y	N
GCA_002981105	Burkholderia	sp. AU12872	Burkholderia	dolosa	Y	N
GCA_003057815	Burkholderia	sp. AU29985	Burkholderia	dolosa	Y	N
GCA_000974835	Burkholderia	cepacia	Burkholderia	dolosa	Y	N
GCA_001544835	Caballeronia	temeraria	Caballeronia	fortuita	Y	N
GCA_009455635	Paraburkholderia	agricolaris	Paraburkholderia	fungorum	Y	N
GCA_003002115	Paraburkholderia	insulsa	Paraburkholderia	fungorum	Y	N
GCA_003634845	Paraburkholderia	sp. RAU2J	Paraburkholderia	fynbosensis	Y	N
GCA_000633145	Burkholderia	sp. A1	Burkholderia	gladioli	Y	N
GCA_011753075	Burkholderia	sp. Ap-962	Burkholderia	gladioli	Y	N
GCA_011753035	Burkholderia	sp. Ax-1720	Burkholderia	gladioli	Y	N
GCA_011753175	Burkholderia	sp. Cy-637	Burkholderia	gladioli	Y	N
GCA_009910715	Burkholderia	sp. ISTR5	Burkholderia	gladioli	Y	N
GCA_007828315	Burkholderia	sp. SJZ089	Burkholderia	gladioli	Y	N
GCA_007993885	Burkholderia	sp. SJZ091	Burkholderia	gladioli	Y	N
GCA_007828455	Burkholderia	sp. SJZ115	Burkholderia	gladioli	Y	N
GCA_011752985	Burkholderia	sp. Tr-860	Burkholderia	gladioli	Y	N
GCA_003208595	Paraburkholderia	sp. GV052	Paraburkholderia	graminis	Y	N
GCA_004341315	Paraburkholderia	sp. GV060	Paraburkholderia	graminis	Y	N
GCA_003058125	Paraburkholderia	sp. GV068	Paraburkholderia	graminis	Y	N
GCA_003050715	Paraburkholderia	sp. GV072	Paraburkholderia	graminis	Y	N
GCA_004346905	Paraburkholderia	sp. GV073	Paraburkholderia	graminis	Y	N
GCA_013149265	Paraburkholderia	sp. SG903	Paraburkholderia	graminis	Y	N
GCA_003096715	Paraburkholderia	silvatlantica	Paraburkholderia	heleia	Y	N
GCA_003201275	Paraburkholderia	silvatlantica	Paraburkholderia	heleia	Y	N
GCA_003217075	Paraburkholderia	silvatlantica	Paraburkholderia	heleia	Y	N
GCA_004363225	Paraburkholderia	silvatlantica	Paraburkholderia	heleia	Y	N
GCA_014191065	Paraburkholderia	silvatlantica	Paraburkholderia	heleia	Y	N
GCA_000959325	Burkholderia	sp. 2002721687	Burkholderia	humptydooensis	Y	N
GCA_001513745	Burkholderia	sp. Bp5365	Burkholderia	humptydooensis	Y	N
GCA_001527625	Burkholderia	sp. MSMB1552	Burkholderia	humptydooensis	Y	N
GCA_001546925	Burkholderia	sp. MSMB1588	Burkholderia	humptydooensis	Y	N
GCA_001636105	Burkholderia	sp. MSMB1589WGS	Burkholderia	humptydooensis	Y	N
GCA_000266985	Burkholderia	thailandensis	Burkholderia	humptydooensis	Y	N
GCA_000385525	Burkholderia	thailandensis	Burkholderia	humptydooensis	Y	N
GCA_002386205	Burkholderia	thailandensis	Burkholderia	humptydooensis	Y	N
GCA_001544875	Caballeronia	calidae	Caballeronia	hypogeia	Y	N
GCA_014384845	Caballeronia	sp. EK	Caballeronia	jiangsuensis	Y	N
GCA_013177715	Paraburkholderia	sp. RL16-012-BIC-B	Paraburkholderia	madseniana	Y	N
GCA_003945255	Caballeronia	sordidicola	Caballeronia	mineralivorans	Y	N
GCA_003693385	Caballeronia	udeis	Caballeronia	mineralivorans	Y	N
GCA_004366615	Caballeronia	udeis	Caballeronia	mineralivorans	Y	N
GCA_001685525	Burkholderia	sp. CCA53	Burkholderia	multivorans	Y	N
GCA_001806955	Burkholderia	sp. HMSC10F09	Burkholderia	multivorans	Y	N
GCA_011605345	Burkholderia	sp. D-99	Burkholderia	novel.001	Y	N
GCA_902499095	Burkholderia	lata	Burkholderia	novel.002	Y	N
GCA_902499205	Burkholderia	lata	Burkholderia	novel.002	Y	N
GCA_902499305	Burkholderia	lata	Burkholderia	novel.002	Y	N
GCA_902499335	Burkholderia	lata	Burkholderia	novel.002	Y	N
GCA_902499015	Burkholderia	lata	Burkholderia	novel.002	Y	N
GCA_902499025	Burkholderia	lata	Burkholderia	novel.003	Y	N
GCA_902499215	Burkholderia	lata	Burkholderia	novel.003	Y	N
GCA_902833045	Burkholderia	sp. BCC0322	Burkholderia	novel.004	Y	N
GCA_902833075	Burkholderia	sp. BCC0405	Burkholderia	novel.004	Y	N
GCA_003330765	Burkholderia	pyrrocinia	Burkholderia	novel.005	Y	N
GCA_001039005	Burkholderia	cepacia	Burkholderia	novel.006	Y	N
GCA_004125865	Burkholderia	stabilis	Burkholderia	novel.006	Y	N
GCA_000689555	Burkholderia	cenocepacia	Burkholderia	novel.007	Y	N
GCA_000689575	Burkholderia	cenocepacia	Burkholderia	novel.007	Y	N
GCA_000689595	Burkholderia	cenocepacia	Burkholderia	novel.007	Y	N
GCA_902832985	Burkholderia	sp. BCC0097	Burkholderia	novel.007	Y	N
GCA_001319805	Burkholderia	sp. E168m22	Burkholderia	novel.007	Y	N
GCA_000014085	Burkholderia	cenocepacia	Burkholderia	novel.007	Y	N
GCA_000019505	Burkholderia	cenocepacia	Burkholderia	novel.007	Y	N
GCA_000152565	Burkholderia	cenocepacia	Burkholderia	novel.007	Y	N
GCA_000203955	Burkholderia	cenocepacia	Burkholderia	novel.007	Y	N
GCA_000498115	Burkholderia	cenocepacia	Burkholderia	novel.007	Y	N
GCA_000783555	Burkholderia	cenocepacia	Burkholderia	novel.007	Y	N
GCA_001718515	Burkholderia	cenocepacia	Burkholderia	novel.007	Y	N
GCA_001992615	Burkholderia	cenocepacia	Burkholderia	novel.007	Y	N
GCA_001992625	Burkholderia	cenocepacia	Burkholderia	novel.007	Y	N
GCA_001992655	Burkholderia	cenocepacia	Burkholderia	novel.007	Y	N
GCA_001992675	Burkholderia	cenocepacia	Burkholderia	novel.007	Y	N
GCA_001992695	Burkholderia	cenocepacia	Burkholderia	novel.007	Y	N
GCA_001992705	Burkholderia	cenocepacia	Burkholderia	novel.007	Y	N
GCA_001992735	Burkholderia	cenocepacia	Burkholderia	novel.007	Y	N
GCA_001992755	Burkholderia	cenocepacia	Burkholderia	novel.007	Y	N
GCA_001993595	Burkholderia	cenocepacia	Burkholderia	novel.007	Y	N
GCA_001993615	Burkholderia	cenocepacia	Burkholderia	novel.007	Y	N
GCA_001999785	Burkholderia	cenocepacia	Burkholderia	novel.007	Y	N
GCA_001999825	Burkholderia	cenocepacia	Burkholderia	novel.007	Y	N
GCA_002007585	Burkholderia	cenocepacia	Burkholderia	novel.007	Y	N
GCA_002981045	Burkholderia	cenocepacia	Burkholderia	novel.007	Y	N
GCA_003076415	Burkholderia	cenocepacia	Burkholderia	novel.007	Y	N
GCA_003854055	Burkholderia	cenocepacia	Burkholderia	novel.007	Y	N
GCA_003854095	Burkholderia	cenocepacia	Burkholderia	novel.007	Y	N
GCA_003854115	Burkholderia	cenocepacia	Burkholderia	novel.007	Y	N
GCA_003854125	Burkholderia	cenocepacia	Burkholderia	novel.007	Y	N
GCA_003854485	Burkholderia	cenocepacia	Burkholderia	novel.007	Y	N
GCA_003854585	Burkholderia	cenocepacia	Burkholderia	novel.007	Y	N
GCA_003854625	Burkholderia	cenocepacia	Burkholderia	novel.007	Y	N
GCA_003854675	Burkholderia	cenocepacia	Burkholderia	novel.007	Y	N
GCA_003854685	Burkholderia	cenocepacia	Burkholderia	novel.007	Y	N
GCA_003854725	Burkholderia	cenocepacia	Burkholderia	novel.007	Y	N
GCA_003854785	Burkholderia	cenocepacia	Burkholderia	novel.007	Y	N
GCA_003854855	Burkholderia	cenocepacia	Burkholderia	novel.007	Y	N
GCA_003938685	Burkholderia	cenocepacia	Burkholderia	novel.007	Y	N
GCA_012273415	Burkholderia	cenocepacia	Burkholderia	novel.007	Y	N
GCA_014211915	Burkholderia	cenocepacia	Burkholderia	novel.007	Y	N
GCA_900100915	Burkholderia	cenocepacia	Burkholderia	novel.007	Y	N
GCA_902829445	Burkholderia	cenocepacia	Burkholderia	novel.007	Y	N
GCA_902830405	Burkholderia	cenocepacia	Burkholderia	novel.007	Y	N
GCA_902830475	Burkholderia	cenocepacia	Burkholderia	novel.007	Y	N
GCA_902830495	Burkholderia	cenocepacia	Burkholderia	novel.007	Y	N
GCA_902830505	Burkholderia	cenocepacia	Burkholderia	novel.007	Y	N
GCA_902830525	Burkholderia	cenocepacia	Burkholderia	novel.007	Y	N
GCA_902830535	Burkholderia	cenocepacia	Burkholderia	novel.007	Y	N
GCA_902830545	Burkholderia	cenocepacia	Burkholderia	novel.007	Y	N
GCA_902830555	Burkholderia	cenocepacia	Burkholderia	novel.007	Y	N
GCA_902830565	Burkholderia	cenocepacia	Burkholderia	novel.007	Y	N
GCA_902830585	Burkholderia	cenocepacia	Burkholderia	novel.007	Y	N
GCA_902830595	Burkholderia	cenocepacia	Burkholderia	novel.007	Y	N
GCA_902830605	Burkholderia	cenocepacia	Burkholderia	novel.007	Y	N
GCA_001729305	Burkholderia	sp. A2	Burkholderia	novel.008	Y	N
GCA_002223345	Burkholderia	sp. AU16741	Burkholderia	novel.008	Y	N
GCA_002223255	Burkholderia	sp. AU17457	Burkholderia	novel.008	Y	N
GCA_002223195	Burkholderia	sp. AU28863	Burkholderia	novel.008	Y	N
GCA_002223185	Burkholderia	sp. AU31280	Burkholderia	novel.008	Y	N
GCA_902832955	Burkholderia	sp. BCC0044	Burkholderia	novel.008	Y	N
GCA_902833245	Burkholderia	sp. BCC0398	Burkholderia	novel.008	Y	N
GCA_902833155	Burkholderia	sp. BCC1047	Burkholderia	novel.008	Y	N
GCA_000818575	Burkholderia	cenocepacia	Burkholderia	novel.008	Y	N
GCA_001541445	Burkholderia	cenocepacia	Burkholderia	novel.008	Y	N
GCA_003854025	Burkholderia	cenocepacia	Burkholderia	novel.008	Y	N
GCA_003854065	Burkholderia	cenocepacia	Burkholderia	novel.008	Y	N
GCA_003854495	Burkholderia	cenocepacia	Burkholderia	novel.008	Y	N
GCA_003854505	Burkholderia	cenocepacia	Burkholderia	novel.008	Y	N
GCA_003854575	Burkholderia	cenocepacia	Burkholderia	novel.008	Y	N
GCA_003854605	Burkholderia	cenocepacia	Burkholderia	novel.008	Y	N
GCA_003854735	Burkholderia	cenocepacia	Burkholderia	novel.008	Y	N
GCA_003854775	Burkholderia	cenocepacia	Burkholderia	novel.008	Y	N
GCA_003854805	Burkholderia	cenocepacia	Burkholderia	novel.008	Y	N
GCA_003854825	Burkholderia	cenocepacia	Burkholderia	novel.008	Y	N
GCA_003858255	Burkholderia	cenocepacia	Burkholderia	novel.008	Y	N
GCA_003858275	Burkholderia	cenocepacia	Burkholderia	novel.008	Y	N
GCA_003966315	Burkholderia	cenocepacia	Burkholderia	novel.008	Y	N
GCA_001523445	Burkholderia	sp. ABCPW	Burkholderia	novel.009	Y	N
GCA_902832865	Burkholderia	sp. BCC0397	Burkholderia	novel.009	Y	N
GCA_902830285	Burkholderia	sp. BCC0419	Burkholderia	novel.009	Y	N
GCA_902833095	Burkholderia	sp. BCC1208	Burkholderia	novel.009	Y	N
GCA_002959955	Burkholderia	sp. BE12	Burkholderia	novel.009	Y	N
GCA_009362285	Burkholderia	sp. BE24	Burkholderia	novel.009	Y	N
GCA_002223355	Burkholderia	sp. HI2761	Burkholderia	novel.009	Y	N
GCA_001524725	Burkholderia	sp. MSMB1072	Burkholderia	novel.009	Y	N
GCA_001528895	Burkholderia	sp. MSMB1078WGS	Burkholderia	novel.009	Y	N
GCA_001534535	Burkholderia	sp. MSMB1459WGS	Burkholderia	novel.009	Y	N
GCA_001526325	Burkholderia	sp. MSMB1826	Burkholderia	novel.009	Y	N
GCA_001526365	Burkholderia	sp. MSMB1835	Burkholderia	novel.009	Y	N
GCA_001532755	Burkholderia	sp. MSMB2157WGS	Burkholderia	novel.009	Y	N
GCA_001522585	Burkholderia	sp. NRF60-BP8	Burkholderia	novel.009	Y	N
GCA_000504665	Burkholderia	cepacia	Burkholderia	novel.009	Y	N
GCA_000756845	Burkholderia	cepacia	Burkholderia	novel.009	Y	N
GCA_013336775	Burkholderia	metallica	Burkholderia	novel.009	Y	N
GCA_013337715	Burkholderia	metallica	Burkholderia	novel.009	Y	N
GCA_002223285	Burkholderia	sp. AU16482	Burkholderia	novel.010	Y	N
GCA_002223215	Burkholderia	sp. AU18528	Burkholderia	novel.010	Y	N
GCA_001523905	Burkholderia	anthina	Burkholderia	novel.010	Y	N
GCA_001524815	Burkholderia	anthina	Burkholderia	novel.010	Y	N
GCA_001524825	Burkholderia	anthina	Burkholderia	novel.010	Y	N
GCA_001527555	Burkholderia	anthina	Burkholderia	novel.010	Y	N
GCA_001527785	Burkholderia	anthina	Burkholderia	novel.010	Y	N
GCA_001530695	Burkholderia	anthina	Burkholderia	novel.010	Y	N
GCA_001532915	Burkholderia	anthina	Burkholderia	novel.010	Y	N
GCA_001547525	Burkholderia	anthina	Burkholderia	novel.010	Y	N
GCA_002925705	Burkholderia	anthina	Burkholderia	novel.010	Y	N
GCA_003854145	Burkholderia	anthina	Burkholderia	novel.010	Y	N
GCA_003857525	Burkholderia	anthina	Burkholderia	novel.010	Y	N
GCA_902833145	Burkholderia	sp. BCC0506	Burkholderia	novel.011	Y	N
GCA_902833175	Burkholderia	sp. BCC0801	Burkholderia	novel.011	Y	N
GCA_902833225	Burkholderia	sp. BCC1644	Burkholderia	novel.012	Y	N
GCA_003853705	Burkholderia	sp. Bp8992	Burkholderia	novel.013	Y	N
GCA_003854285	Burkholderia	sp. Bp8977	Burkholderia	novel.015	Y	N
GCA_003853755	Burkholderia	sp. Bp8984	Burkholderia	novel.015	Y	N
GCA_003854225	Burkholderia	sp. Bp8986	Burkholderia	novel.015	Y	N
GCA_003854215	Burkholderia	sp. Bp8989	Burkholderia	novel.015	Y	N
GCA_003853815	Burkholderia	sp. Bp8990	Burkholderia	novel.015	Y	N
GCA_003853795	Burkholderia	sp. Bp8991	Burkholderia	novel.015	Y	N
GCA_003853805	Burkholderia	sp. Bp8994	Burkholderia	novel.015	Y	N
GCA_003853695	Burkholderia	sp. Bp8995	Burkholderia	novel.015	Y	N
GCA_003854195	Burkholderia	sp. Bp9010	Burkholderia	novel.015	Y	N
GCA_003854165	Burkholderia	sp. Bp9011	Burkholderia	novel.015	Y	N
GCA_003853505	Burkholderia	sp. Bp9015	Burkholderia	novel.015	Y	N
GCA_003857985	Burkholderia	sp. Bp9090	Burkholderia	novel.015	Y	N
GCA_003857805	Burkholderia	sp. Bp9099	Burkholderia	novel.015	Y	N
GCA_003853655	Burkholderia	sp. Bp9131	Burkholderia	novel.015	Y	N
GCA_000949135	Burkholderia	sp. USM	Burkholderia	novel.015	Y	N
GCA_003853425	Burkholderia	sp. Bp9140	Burkholderia	novel.016	Y	N
GCA_003853415	Burkholderia	sp. Bp9142	Burkholderia	novel.016	Y	N
GCA_003857965	Burkholderia	sp. Bp9031	Burkholderia	novel.017	Y	N
GCA_001443045	Burkholderia	ambifaria	Burkholderia	novel.017	Y	N
GCA_003854235	Burkholderia	sp. Bp8998	Burkholderia	novel.018	Y	N
GCA_003853645	Burkholderia	sp. Bp9143	Burkholderia	novel.018	Y	N
GCA_000292915	Burkholderia	cepacia	Burkholderia	novel.019	Y	N
GCA_003635165	Burkholderia	sp. Nafp2/4-1b	Burkholderia	novel.020	Y	N
GCA_000764955	Burkholderia	cenocepacia	Burkholderia	novel.021	Y	N
GCA_001525985	Burkholderia	latens	Burkholderia	novel.021	Y	N
GCA_001718795	Burkholderia	latens	Burkholderia	novel.021	Y	N
GCA_001718835	Burkholderia	cepacia	Burkholderia	novel.022	Y	N
GCA_001718695	Burkholderia	ubonensis	Burkholderia	novel.023	Y	N
GCA_004343775	Burkholderia	sp. SRS-46	Burkholderia	novel.024	Y	N
GCA_003854275	Burkholderia	sp. Bp8963	Burkholderia	novel.025	Y	N
GCA_000687455	Burkholderia	sp. lig30	Burkholderia	novel.026	Y	N
GCA_013403875	Burkholderia	sp. DHOM02	Burkholderia	novel.027	Y	N
GCA_001522865	Burkholderia	sp. TSV86	Burkholderia	novel.028	Y	N
GCA_014397785	Paraburkholderia	sp. WC7.3b	Paraburkholderia	novel.029	Y	N
GCA_005144415	Trinickia	sp. 7GSK02	Trinickia	novel.031	Y	N
GCA_001718195	Paraburkholderia	nodosa	Paraburkholderia	novel.032	Y	N
GCA_009789655	Paraburkholderia	sp. 7Q-K02	Paraburkholderia	novel.033	Y	N
GCA_009789675	Paraburkholderia	sp. DHF22	Paraburkholderia	novel.035	Y	N
GCA_000773065	Burkholderia	sp. ABCPW	Burkholderia	novel.036	Y	N
GCA_001546915	Burkholderia	sp. BDU18	Burkholderia	novel.036	Y	N
GCA_001546955	Burkholderia	sp. BDU19	Burkholderia	novel.036	Y	N
GCA_001524425	Burkholderia	sp. MSMB0265	Burkholderia	novel.036	Y	N
GCA_001524445	Burkholderia	sp. MSMB0266	Burkholderia	novel.036	Y	N
GCA_001524625	Burkholderia	sp. MSMB0852	Burkholderia	novel.036	Y	N
GCA_001526245	Burkholderia	sp. MSMB1498	Burkholderia	novel.036	Y	N
GCA_001524525	Burkholderia	sp. MSMB2040	Burkholderia	novel.036	Y	N
GCA_001524565	Burkholderia	sp. MSMB2041	Burkholderia	novel.036	Y	N
GCA_001524585	Burkholderia	sp. MSMB2042	Burkholderia	novel.036	Y	N
GCA_001532025	Burkholderia	sp. MSMB617WGS	Burkholderia	novel.036	Y	N
GCA_004298475	Paraburkholderia	sp.	Paraburkholderia	novel.038	Y	N
GCA_004322125	Paraburkholderia	sp.	Paraburkholderia	novel.038	Y	N
GCA_003837865	Paraburkholderia	dinghuensis	Paraburkholderia	novel.039	Y	N
GCA_003350035	Paraburkholderia	kururiensis	Paraburkholderia	novel.040	Y	N
GCA_003253405	Paraburkholderia	sp. PDC91	Paraburkholderia	novel.042	Y	N
GCA_003610135	Paraburkholderia	sediminicola	Paraburkholderia	novel.043	Y	N
GCA_003634155	Paraburkholderia	sediminicola	Paraburkholderia	novel.043	Y	N
GCA_004362135	Paraburkholderia	sediminicola	Paraburkholderia	novel.043	Y	N
GCA_004363325	Paraburkholderia	sediminicola	Paraburkholderia	novel.043	Y	N
GCA_013177695	Paraburkholderia	sp. 1N	Paraburkholderia	novel.044	Y	N
GCA_012927345	Paraburkholderia	sp. RP-4-7	Paraburkholderia	novel.045	Y	N
GCA_013177735	Paraburkholderia	sp. 5N	Paraburkholderia	novel.046	Y	N
GCA_001634365	Paraburkholderia	phytofirmans	Paraburkholderia	novel.047	Y	N
GCA_003610295	Paraburkholderia	sp. BL23I1N1	Paraburkholderia	novel.048	Y	N
GCA_014192855	Paraburkholderia	sp. WP4_3_2	Paraburkholderia	novel.050	Y	N
GCA_014200455	Paraburkholderia	bannensis	Paraburkholderia	novel.050	Y	N
GCA_003610895	Paraburkholderia	fungorum	Paraburkholderia	novel.051	Y	N
GCA_003634175	Paraburkholderia	sp. BL17N1	Paraburkholderia	novel.053	Y	N
GCA_003002025	Paraburkholderia	sp. BL25I1N1	Paraburkholderia	novel.053	Y	N
GCA_003386115	Paraburkholderia	sp. BL27I4N3	Paraburkholderia	novel.053	Y	N
GCA_004366535	Paraburkholderia	sp. BL6665CI2N2	Paraburkholderia	novel.053	Y	N
GCA_003387275	Paraburkholderia	sp. BL6669N2	Paraburkholderia	novel.053	Y	N
GCA_012689525	Paraburkholderia	aromaticivorans	Paraburkholderia	novel.054	Y	N
GCA_004339745	Paraburkholderia	sp. BL9I2N2	Paraburkholderia	novel.055	Y	N
GCA_902459535	Paraburkholderia	sp. Msb3	Paraburkholderia	novel.056	Y	N
GCA_902833695	Paraburkholderia	sp. BCC1876	Paraburkholderia	novel.058	Y	N
GCA_013408935	Paraburkholderia	bryophila	Paraburkholderia	novel.058	Y	N
GCA_013409255	Paraburkholderia	bryophila	Paraburkholderia	novel.058	Y	N
GCA_013409275	Paraburkholderia	bryophila	Paraburkholderia	novel.058	Y	N
GCA_014200335	Paraburkholderia	bryophila	Paraburkholderia	novel.058	Y	N
GCA_002973525	Paraburkholderia	sp. BL21I4N1	Paraburkholderia	novel.059	Y	N
GCA_900996225	Paraburkholderia	sp. BCC1884	Paraburkholderia	novel.060	Y	N
GCA_008369935	Paraburkholderia	sp. DCY113	Paraburkholderia	novel.062	Y	N
GCA_900099835	Paraburkholderia	fungorum	Paraburkholderia	novel.063	Y	N
GCA_900996245	Paraburkholderia	sp. BCC1886	Paraburkholderia	novel.064	Y	N
GCA_003693345	Paraburkholderia	phenazinium	Paraburkholderia	novel.068	Y	N
GCA_003751885	Paraburkholderia	phenazinium	Paraburkholderia	novel.068	Y	N
GCA_004365055	Paraburkholderia	phenazinium	Paraburkholderia	novel.068	Y	N
GCA_900141745	Paraburkholderia	phenazinium	Paraburkholderia	novel.069	Y	N
GCA_900142845	Paraburkholderia	phenazinium	Paraburkholderia	novel.070	Y	N
GCA_900996235	Paraburkholderia	sp. BCC1885	Paraburkholderia	novel.071	Y	N
GCA_003429005	Paraburkholderia	sp. DHOC27	Paraburkholderia	novel.073	Y	N
GCA_004197395	Paraburkholderia	sp. UYCP14C	Paraburkholderia	novel.076	Y	N
GCA_012927125	Paraburkholderia	sp. G-4-1-8	Paraburkholderia	novel.079	Y	N
GCA_011752945	Paraburkholderia	sp. Cy-641	Paraburkholderia	novel.080	Y	N
GCA_004361815	Paraburkholderia	sp. BL10I2N1	Paraburkholderia	novel.081	Y	N
GCA_013426915	Paraburkholderia	sp. PGU19	Paraburkholderia	novel.082	Y	N
GCA_013426895	Paraburkholderia	sp. PGU16	Paraburkholderia	novel.083	Y	N
GCA_003121405	Paraburkholderia	sp. C35	Paraburkholderia	novel.084	Y	N
GCA_001922345	Paraburkholderia	sp. SOS3	Paraburkholderia	novel.087	Y	N
GCA_004359985	Paraburkholderia	sp. LD6	Paraburkholderia	novel.088	Y	N
GCA_902833455	Caballeronia	sp. BCC1704	Caballeronia	novel.090	Y	N
GCA_002220365	Caballeronia	sordidicola	Caballeronia	novel.092	Y	N
GCA_000729995	Caballeronia	sordidicola	Caballeronia	novel.093	Y	N
GCA_011493005	Caballeronia	sp. SBC1	Caballeronia	novel.094	Y	N
GCA_011039955	Caballeronia	sp. SBC2	Caballeronia	novel.094	Y	N
GCA_001935975	Caballeronia	sordidicola	Caballeronia	novel.095	Y	N
GCA_002141475	Caballeronia	sordidicola	Caballeronia	novel.095	Y	N
GCA_002141485	Caballeronia	sordidicola	Caballeronia	novel.095	Y	N
GCA_003001875	Paraburkholderia	sp. BL18I3N2	Paraburkholderia	novel.099	Y	N
GCA_003096875	Paraburkholderia	unamae	Paraburkholderia	novel.106	Y	N
GCA_003268775	Paraburkholderia	unamae	Paraburkholderia	novel.106	Y	N
GCA_013410765	Paraburkholderia	bryophila	Paraburkholderia	novel.107	Y	N
GCA_013409525	Paraburkholderia	metrosideri	Paraburkholderia	novel.107	Y	N
GCA_013409845	Paraburkholderia	metrosideri	Paraburkholderia	novel.107	Y	N
GCA_013410245	Paraburkholderia	metrosideri	Paraburkholderia	novel.107	Y	N
GCA_001523835	Burkholderia	sp. ABCPW	Burkholderia	oklahomensis	Y	N
GCA_001522845	Burkholderia	sp. BDU5	Burkholderia	oklahomensis	Y	N
GCA_001523745	Burkholderia	sp. BDU6	Burkholderia	oklahomensis	Y	N
GCA_001522635	Burkholderia	sp. BDU8	Burkholderia	oklahomensis	Y	N
GCA_004524855	Paraburkholderia	sp. 7MH5	Paraburkholderia	oxyphila	Y	N
GCA_000731655	Burkholderia	sp. MSh2	Burkholderia	paludis	Y	N
GCA_002900705	Burkholderia	sp. 117	Burkholderia	pseudomallei	Y	N
GCA_002900725	Burkholderia	sp. 129	Burkholderia	pseudomallei	Y	N
GCA_002900675	Burkholderia	sp. 136(2017)	Burkholderia	pseudomallei	Y	N
GCA_002900745	Burkholderia	sp. 137	Burkholderia	pseudomallei	Y	N
GCA_000755725	Burkholderia	cenocepacia	Burkholderia	pseudomultivorans	Y	N
GCA_009362305	Burkholderia	sp. BE17	Burkholderia	pyrrocinia	Y	N
GCA_003233675	Burkholderia	sp. JP2-270	Burkholderia	pyrrocinia	Y	N
GCA_900119135	Burkholderia	sp. NFACC33-1	Burkholderia	pyrrocinia	Y	N
GCA_900119325	Burkholderia	sp. NFPP32	Burkholderia	pyrrocinia	Y	N
GCA_002968055	Burkholderia	cepacia	Burkholderia	pyrrocinia	Y	N
GCA_013337705	Burkholderia	diffusa	Burkholderia	pyrrocinia	Y	N
GCA_001685505	Burkholderia	stabilis	Burkholderia	pyrrocinia	Y	N
GCA_002356275	Burkholderia	stabilis	Burkholderia	pyrrocinia	Y	N
GCA_004297925	Paraburkholderia	sp.	Paraburkholderia	sartisoli	Y	N
GCA_000705535	Burkholderia	cenocepacia	Burkholderia	seminalis	Y	N
GCA_001718875	Burkholderia	sp. Bp7605	Burkholderia	singularis	Y	N
GCA_002881095	Burkholderia	sp. MSMB175	Burkholderia	singularis	Y	N
GCA_009826925	Burkholderia	sp. 4701	Burkholderia	stagnalis	Y	N
GCA_009826995	Burkholderia	sp. 4812	Burkholderia	stagnalis	Y	N
GCA_003857485	Burkholderia	sp. Bp9002	Burkholderia	stagnalis	Y	N
GCA_003853435	Burkholderia	sp. Bp9125	Burkholderia	stagnalis	Y	N
GCA_003853715	Burkholderia	sp. Bp9126	Burkholderia	stagnalis	Y	N
GCA_900631665	Burkholderia	anthina	Burkholderia	stagnalis	Y	N
GCA_000297475	Burkholderia	pyrrocinia	Burkholderia	stagnalis	Y	N
GCA_001527685	Burkholderia	pyrrocinia	Burkholderia	stagnalis	Y	N
GCA_000383275	Paraburkholderia	caledonica	Paraburkholderia	strydomiana	Y	N
GCA_002179925	Paraburkholderia	caledonica	Paraburkholderia	strydomiana	Y	N
GCA_001544795	Caballeronia	hypogeia	Caballeronia	temeraria	Y	N
GCA_900100565	Paraburkholderia	steynii	Paraburkholderia	terrae	Y	N
GCA_900104005	Paraburkholderia	sediminicola	Paraburkholderia	terricola	Y	N
GCA_001522375	Burkholderia	diffusa	Burkholderia	territorii	Y	N
GCA_001523065	Burkholderia	diffusa	Burkholderia	territorii	Y	N
GCA_001523145	Burkholderia	diffusa	Burkholderia	territorii	Y	N
GCA_001524385	Burkholderia	diffusa	Burkholderia	territorii	Y	N
GCA_001524705	Burkholderia	diffusa	Burkholderia	territorii	Y	N
GCA_001527605	Burkholderia	diffusa	Burkholderia	territorii	Y	N
GCA_001531975	Burkholderia	diffusa	Burkholderia	territorii	Y	N
GCA_001532105	Burkholderia	diffusa	Burkholderia	territorii	Y	N
GCA_001532285	Burkholderia	diffusa	Burkholderia	territorii	Y	N
GCA_001533155	Burkholderia	diffusa	Burkholderia	territorii	Y	N
GCA_001533185	Burkholderia	diffusa	Burkholderia	territorii	Y	N
GCA_001718315	Burkholderia	diffusa	Burkholderia	territorii	Y	N
GCA_003849705	Paraburkholderia	bannensis	Paraburkholderia	tropica	Y	N
GCA_014397645	Paraburkholderia	sp. 31.1	Paraburkholderia	tuberum	Y	N
GCA_014201055	Paraburkholderia	sp. CI2	Paraburkholderia	tuberum	Y	N
GCA_014201065	Paraburkholderia	sp. Cpub6	Paraburkholderia	tuberum	Y	N
GCA_014200875	Paraburkholderia	sp. HC6.4b	Paraburkholderia	tuberum	Y	N
GCA_014200965	Paraburkholderia	sp. Kb1A	Paraburkholderia	tuberum	Y	N
GCA_014201025	Paraburkholderia	sp. MM5384-R2	Paraburkholderia	tuberum	Y	N
GCA_014397665	Paraburkholderia	sp. UCT2	Paraburkholderia	tuberum	Y	N
GCA_014397655	Paraburkholderia	sp. UCT31	Paraburkholderia	tuberum	Y	N
GCA_014200995	Paraburkholderia	sp. WSM4177	Paraburkholderia	tuberum	Y	N
GCA_014201005	Paraburkholderia	sp. WSM4180	Paraburkholderia	tuberum	Y	N
GCA_000833595	Burkholderia	sp. MSHR3999	Burkholderia	ubonensis	Y	N
GCA_003812965	Burkholderia	multivorans	Burkholderia	ubonensis	Y	N
GCA_004339705	Caballeronia	sordidicola	Caballeronia	udeis	Y	N
GCA_004368385	Burkholderia	sp. B10	Burkholderia	vietnamiensis	Y	N
GCA_000262695	Burkholderia	sp. KJ006	Burkholderia	vietnamiensis	Y	N
GCA_013822785	Burkholderia	sp. MBR-1	Burkholderia	vietnamiensis	Y	N
GCA_000745665	Burkholderia	sp. WP42	Burkholderia	vietnamiensis	Y	N
GCA_006483485	Burkholderia	ubonensis	Burkholderia	vietnamiensis	Y	N
GCA_002879885	Burkholderia	dabaoshanensis	Trinickia	dabaoshanensis	N	Y
GCA_900258035	Burkholderia	novacaledonica	Caballeronia	novacaledonica	N	Y
GCA_902859915	Burkholderia	ultramafica	Paraburkholderia	ultramafica	N	Y
GCA_000684975	Paraburkholderia	acidipaludis	Paraburkholderia	acidipaludis	Y	Y
GCA_902859895	Pararobbsia	alpina	Pararobbsia	alpina	Y	Y
GCA_000019925	Burkholderia	ambifaria	Burkholderia	ambifaria	Y	Y
GCA_000181975	Burkholderia	ambifaria	Burkholderia	ambifaria	Y	Y
GCA_000182015	Burkholderia	ambifaria	Burkholderia	ambifaria	Y	Y
GCA_000203915	Burkholderia	ambifaria	Burkholderia	ambifaria	Y	Y
GCA_000959545	Burkholderia	ambifaria	Burkholderia	ambifaria	Y	Y
GCA_002554435	Burkholderia	ambifaria	Burkholderia	ambifaria	Y	Y
GCA_002980755	Burkholderia	ambifaria	Burkholderia	ambifaria	Y	Y
GCA_002981655	Burkholderia	ambifaria	Burkholderia	ambifaria	Y	Y
GCA_011392275	Burkholderia	ambifaria	Burkholderia	ambifaria	Y	Y
GCA_900631675	Burkholderia	ambifaria	Burkholderia	ambifaria	Y	Y
GCA_902829415	Burkholderia	ambifaria	Burkholderia	ambifaria	Y	Y
GCA_902829435	Burkholderia	ambifaria	Burkholderia	ambifaria	Y	Y
GCA_902829465	Burkholderia	ambifaria	Burkholderia	ambifaria	Y	Y
GCA_902829475	Burkholderia	ambifaria	Burkholderia	ambifaria	Y	Y
GCA_902829565	Burkholderia	ambifaria	Burkholderia	ambifaria	Y	Y
GCA_902829595	Burkholderia	ambifaria	Burkholderia	ambifaria	Y	Y
GCA_902829645	Burkholderia	ambifaria	Burkholderia	ambifaria	Y	Y
GCA_902829655	Burkholderia	ambifaria	Burkholderia	ambifaria	Y	Y
GCA_902829665	Burkholderia	ambifaria	Burkholderia	ambifaria	Y	Y
GCA_902829675	Burkholderia	ambifaria	Burkholderia	ambifaria	Y	Y
GCA_902829685	Burkholderia	ambifaria	Burkholderia	ambifaria	Y	Y
GCA_902829695	Burkholderia	ambifaria	Burkholderia	ambifaria	Y	Y
GCA_902829705	Burkholderia	ambifaria	Burkholderia	ambifaria	Y	Y
GCA_902829725	Burkholderia	ambifaria	Burkholderia	ambifaria	Y	Y
GCA_902829735	Burkholderia	ambifaria	Burkholderia	ambifaria	Y	Y
GCA_902829755	Burkholderia	ambifaria	Burkholderia	ambifaria	Y	Y
GCA_902829765	Burkholderia	ambifaria	Burkholderia	ambifaria	Y	Y
GCA_902829775	Burkholderia	ambifaria	Burkholderia	ambifaria	Y	Y
GCA_902829785	Burkholderia	ambifaria	Burkholderia	ambifaria	Y	Y
GCA_902829805	Burkholderia	ambifaria	Burkholderia	ambifaria	Y	Y
GCA_902829815	Burkholderia	ambifaria	Burkholderia	ambifaria	Y	Y
GCA_902829825	Burkholderia	ambifaria	Burkholderia	ambifaria	Y	Y
GCA_902829835	Burkholderia	ambifaria	Burkholderia	ambifaria	Y	Y
GCA_902829845	Burkholderia	ambifaria	Burkholderia	ambifaria	Y	Y
GCA_902829855	Burkholderia	ambifaria	Burkholderia	ambifaria	Y	Y
GCA_902829865	Burkholderia	ambifaria	Burkholderia	ambifaria	Y	Y
GCA_902829875	Burkholderia	ambifaria	Burkholderia	ambifaria	Y	Y
GCA_902829885	Burkholderia	ambifaria	Burkholderia	ambifaria	Y	Y
GCA_902829895	Burkholderia	ambifaria	Burkholderia	ambifaria	Y	Y
GCA_902829905	Burkholderia	ambifaria	Burkholderia	ambifaria	Y	Y
GCA_902829915	Burkholderia	ambifaria	Burkholderia	ambifaria	Y	Y
GCA_902829925	Burkholderia	ambifaria	Burkholderia	ambifaria	Y	Y
GCA_902829935	Burkholderia	ambifaria	Burkholderia	ambifaria	Y	Y
GCA_902829945	Burkholderia	ambifaria	Burkholderia	ambifaria	Y	Y
GCA_902829955	Burkholderia	ambifaria	Burkholderia	ambifaria	Y	Y
GCA_902829965	Burkholderia	ambifaria	Burkholderia	ambifaria	Y	Y
GCA_902829975	Burkholderia	ambifaria	Burkholderia	ambifaria	Y	Y
GCA_902829985	Burkholderia	ambifaria	Burkholderia	ambifaria	Y	Y
GCA_902829995	Burkholderia	ambifaria	Burkholderia	ambifaria	Y	Y
GCA_902830005	Burkholderia	ambifaria	Burkholderia	ambifaria	Y	Y
GCA_902830015	Burkholderia	ambifaria	Burkholderia	ambifaria	Y	Y
GCA_902830025	Burkholderia	ambifaria	Burkholderia	ambifaria	Y	Y
GCA_902830035	Burkholderia	ambifaria	Burkholderia	ambifaria	Y	Y
GCA_902830045	Burkholderia	ambifaria	Burkholderia	ambifaria	Y	Y
GCA_902830055	Burkholderia	ambifaria	Burkholderia	ambifaria	Y	Y
GCA_902830065	Burkholderia	ambifaria	Burkholderia	ambifaria	Y	Y
GCA_902830075	Burkholderia	ambifaria	Burkholderia	ambifaria	Y	Y
GCA_902830085	Burkholderia	ambifaria	Burkholderia	ambifaria	Y	Y
GCA_902830095	Burkholderia	ambifaria	Burkholderia	ambifaria	Y	Y
GCA_902830105	Burkholderia	ambifaria	Burkholderia	ambifaria	Y	Y
GCA_902830115	Burkholderia	ambifaria	Burkholderia	ambifaria	Y	Y
GCA_902830125	Burkholderia	ambifaria	Burkholderia	ambifaria	Y	Y
GCA_902830135	Burkholderia	ambifaria	Burkholderia	ambifaria	Y	Y
GCA_902830155	Burkholderia	ambifaria	Burkholderia	ambifaria	Y	Y
GCA_902830165	Burkholderia	ambifaria	Burkholderia	ambifaria	Y	Y
GCA_902830175	Burkholderia	ambifaria	Burkholderia	ambifaria	Y	Y
GCA_902830205	Burkholderia	ambifaria	Burkholderia	ambifaria	Y	Y
GCA_902830225	Burkholderia	ambifaria	Burkholderia	ambifaria	Y	Y
GCA_902830255	Burkholderia	ambifaria	Burkholderia	ambifaria	Y	Y
GCA_000566705	Robbsia	andropogonis	Robbsia	andropogonis	Y	Y
GCA_000970345	Robbsia	andropogonis	Robbsia	andropogonis	Y	Y
GCA_902833845	Robbsia	andropogonis	Robbsia	andropogonis	Y	Y
GCA_902498995	Burkholderia	anthina	Burkholderia	anthina	Y	Y
GCA_902829335	Burkholderia	anthina	Burkholderia	anthina	Y	Y
GCA_902829625	Burkholderia	anthina	Burkholderia	anthina	Y	Y
GCA_902830145	Burkholderia	anthina	Burkholderia	anthina	Y	Y
GCA_902830315	Burkholderia	anthina	Burkholderia	anthina	Y	Y
GCA_902830325	Burkholderia	anthina	Burkholderia	anthina	Y	Y
GCA_902830335	Burkholderia	anthina	Burkholderia	anthina	Y	Y
GCA_902830345	Burkholderia	anthina	Burkholderia	anthina	Y	Y
GCA_902830365	Burkholderia	anthina	Burkholderia	anthina	Y	Y
GCA_902830375	Burkholderia	anthina	Burkholderia	anthina	Y	Y
GCA_902830395	Burkholderia	anthina	Burkholderia	anthina	Y	Y
GCA_902830415	Burkholderia	anthina	Burkholderia	anthina	Y	Y
GCA_902830445	Burkholderia	anthina	Burkholderia	anthina	Y	Y
GCA_902830485	Burkholderia	anthina	Burkholderia	anthina	Y	Y
GCA_001544975	Caballeronia	arationis	Caballeronia	arationis	Y	Y
GCA_900230245	Caballeronia	arationis	Caballeronia	arationis	Y	Y
GCA_902499125	Burkholderia	arboris	Burkholderia	arboris	Y	Y
GCA_902830425	Burkholderia	arboris	Burkholderia	arboris	Y	Y
GCA_002278075	Paraburkholderia	aromaticivorans	Paraburkholderia	aromaticivorans	Y	Y
GCA_001544695	Caballeronia	arvi	Caballeronia	arvi	Y	Y
GCA_900116445	Paraburkholderia	aspalathi	Paraburkholderia	aspalathi	Y	Y
GCA_000092885	Paraburkholderia	atlantica	Paraburkholderia	atlantica	Y	Y
GCA_000372985	Paraburkholderia	atlantica	Paraburkholderia	atlantica	Y	Y
GCA_009362785	Paraburkholderia	atlantica	Paraburkholderia	atlantica	Y	Y
GCA_013367625	Paraburkholderia	atlantica	Paraburkholderia	atlantica	Y	Y
GCA_014200895	Paraburkholderia	atlantica	Paraburkholderia	atlantica	Y	Y
GCA_014200905	Paraburkholderia	atlantica	Paraburkholderia	atlantica	Y	Y
GCA_014200955	Paraburkholderia	atlantica	Paraburkholderia	atlantica	Y	Y
GCA_007995085	Paraburkholderia	azotifigens	Paraburkholderia	azotifigens	Y	Y
GCA_000685015	Paraburkholderia	bannensis	Paraburkholderia	bannensis	Y	Y
GCA_009455625	Paraburkholderia	bonniea	Paraburkholderia	bonniea	Y	Y
GCA_003269035	Paraburkholderia	bryophila	Paraburkholderia	bryophila	Y	Y
GCA_902833525	Paraburkholderia	bryophila	Paraburkholderia	bryophila	Y	Y
GCA_003201435	Paraburkholderia	caballeronis	Paraburkholderia	caballeronis	Y	Y
GCA_003201635	Paraburkholderia	caballeronis	Paraburkholderia	caballeronis	Y	Y
GCA_003259875	Paraburkholderia	caballeronis	Paraburkholderia	caballeronis	Y	Y
GCA_004365245	Paraburkholderia	caballeronis	Paraburkholderia	caballeronis	Y	Y
GCA_004365795	Paraburkholderia	caballeronis	Paraburkholderia	caballeronis	Y	Y
GCA_004366045	Paraburkholderia	caballeronis	Paraburkholderia	caballeronis	Y	Y
GCA_004368685	Paraburkholderia	caballeronis	Paraburkholderia	caballeronis	Y	Y
GCA_900104845	Paraburkholderia	caballeronis	Paraburkholderia	caballeronis	Y	Y
GCA_900109675	Paraburkholderia	caballeronis	Paraburkholderia	caballeronis	Y	Y
GCA_003368325	Paraburkholderia	caffeinilytica	Paraburkholderia	caffeinilytica	Y	Y
GCA_014640695	Paraburkholderia	caffeinilytica	Paraburkholderia	caffeinilytica	Y	Y
GCA_902859905	Paraburkholderia	caffeinilytica	Paraburkholderia	caffeinilytica	Y	Y
GCA_902859945	Paraburkholderia	caffeinitolerans	Paraburkholderia	caffeinitolerans	Y	Y
GCA_000685095	Paraburkholderia	caledonica	Paraburkholderia	caledonica	Y	Y
GCA_003330745	Paraburkholderia	caledonica	Paraburkholderia	caledonica	Y	Y
GCA_902833635	Paraburkholderia	caledonica	Paraburkholderia	caledonica	Y	Y
GCA_000522545	Paraburkholderia	caribensis	Paraburkholderia	caribensis	Y	Y
GCA_001449005	Paraburkholderia	caribensis	Paraburkholderia	caribensis	Y	Y
GCA_001611015	Paraburkholderia	caribensis	Paraburkholderia	caribensis	Y	Y
GCA_002902945	Paraburkholderia	caribensis	Paraburkholderia	caribensis	Y	Y
GCA_003028645	Paraburkholderia	caribensis	Paraburkholderia	caribensis	Y	Y
GCA_013378095	Paraburkholderia	caribensis	Paraburkholderia	caribensis	Y	Y
GCA_902833515	Paraburkholderia	caribensis	Paraburkholderia	caribensis	Y	Y
GCA_902833585	Paraburkholderia	caribensis	Paraburkholderia	caribensis	Y	Y
GCA_002879875	Trinickia	caryophylli	Trinickia	caryophylli	Y	Y
GCA_003350265	Trinickia	caryophylli	Trinickia	caryophylli	Y	Y
GCA_007097545	Trinickia	caryophylli	Trinickia	caryophylli	Y	Y
GCA_900177465	Trinickia	caryophylli	Trinickia	caryophylli	Y	Y
GCA_902833925	Trinickia	caryophylli	Trinickia	caryophylli	Y	Y
GCA_001883705	Burkholderia	catarinensis	Burkholderia	catarinensis	Y	Y
GCA_001544755	Caballeronia	catudaia	Caballeronia	catudaia	Y	Y
GCA_000009485	Burkholderia	cenocepacia	Burkholderia	cenocepacia	Y	Y
GCA_000236215	Burkholderia	cenocepacia	Burkholderia	cenocepacia	Y	Y
GCA_000333135	Burkholderia	cenocepacia	Burkholderia	cenocepacia	Y	Y
GCA_000333155	Burkholderia	cenocepacia	Burkholderia	cenocepacia	Y	Y
GCA_000981305	Burkholderia	cenocepacia	Burkholderia	cenocepacia	Y	Y
GCA_001055325	Burkholderia	cenocepacia	Burkholderia	cenocepacia	Y	Y
GCA_001056365	Burkholderia	cenocepacia	Burkholderia	cenocepacia	Y	Y
GCA_001056375	Burkholderia	cenocepacia	Burkholderia	cenocepacia	Y	Y
GCA_001056655	Burkholderia	cenocepacia	Burkholderia	cenocepacia	Y	Y
GCA_001056705	Burkholderia	cenocepacia	Burkholderia	cenocepacia	Y	Y
GCA_001057175	Burkholderia	cenocepacia	Burkholderia	cenocepacia	Y	Y
GCA_001059305	Burkholderia	cenocepacia	Burkholderia	cenocepacia	Y	Y
GCA_001059335	Burkholderia	cenocepacia	Burkholderia	cenocepacia	Y	Y
GCA_001071255	Burkholderia	cenocepacia	Burkholderia	cenocepacia	Y	Y
GCA_001072455	Burkholderia	cenocepacia	Burkholderia	cenocepacia	Y	Y
GCA_001484665	Burkholderia	cenocepacia	Burkholderia	cenocepacia	Y	Y
GCA_001524105	Burkholderia	cenocepacia	Burkholderia	cenocepacia	Y	Y
GCA_001531965	Burkholderia	cenocepacia	Burkholderia	cenocepacia	Y	Y
GCA_001533105	Burkholderia	cenocepacia	Burkholderia	cenocepacia	Y	Y
GCA_001606115	Burkholderia	cenocepacia	Burkholderia	cenocepacia	Y	Y
GCA_001606135	Burkholderia	cenocepacia	Burkholderia	cenocepacia	Y	Y
GCA_001718895	Burkholderia	cenocepacia	Burkholderia	cenocepacia	Y	Y
GCA_001720525	Burkholderia	cenocepacia	Burkholderia	cenocepacia	Y	Y
GCA_001720575	Burkholderia	cenocepacia	Burkholderia	cenocepacia	Y	Y
GCA_001984275	Burkholderia	cenocepacia	Burkholderia	cenocepacia	Y	Y
GCA_001984285	Burkholderia	cenocepacia	Burkholderia	cenocepacia	Y	Y
GCA_001984315	Burkholderia	cenocepacia	Burkholderia	cenocepacia	Y	Y
GCA_001984325	Burkholderia	cenocepacia	Burkholderia	cenocepacia	Y	Y
GCA_001984355	Burkholderia	cenocepacia	Burkholderia	cenocepacia	Y	Y
GCA_001984375	Burkholderia	cenocepacia	Burkholderia	cenocepacia	Y	Y
GCA_001991115	Burkholderia	cenocepacia	Burkholderia	cenocepacia	Y	Y
GCA_001991135	Burkholderia	cenocepacia	Burkholderia	cenocepacia	Y	Y
GCA_001991155	Burkholderia	cenocepacia	Burkholderia	cenocepacia	Y	Y
GCA_001991175	Burkholderia	cenocepacia	Burkholderia	cenocepacia	Y	Y
GCA_001991195	Burkholderia	cenocepacia	Burkholderia	cenocepacia	Y	Y
GCA_001991215	Burkholderia	cenocepacia	Burkholderia	cenocepacia	Y	Y
GCA_001991255	Burkholderia	cenocepacia	Burkholderia	cenocepacia	Y	Y
GCA_001991275	Burkholderia	cenocepacia	Burkholderia	cenocepacia	Y	Y
GCA_001991295	Burkholderia	cenocepacia	Burkholderia	cenocepacia	Y	Y
GCA_001991315	Burkholderia	cenocepacia	Burkholderia	cenocepacia	Y	Y
GCA_001991325	Burkholderia	cenocepacia	Burkholderia	cenocepacia	Y	Y
GCA_001991355	Burkholderia	cenocepacia	Burkholderia	cenocepacia	Y	Y
GCA_001991375	Burkholderia	cenocepacia	Burkholderia	cenocepacia	Y	Y
GCA_001991385	Burkholderia	cenocepacia	Burkholderia	cenocepacia	Y	Y
GCA_001991415	Burkholderia	cenocepacia	Burkholderia	cenocepacia	Y	Y
GCA_001991435	Burkholderia	cenocepacia	Burkholderia	cenocepacia	Y	Y
GCA_001991475	Burkholderia	cenocepacia	Burkholderia	cenocepacia	Y	Y
GCA_001991495	Burkholderia	cenocepacia	Burkholderia	cenocepacia	Y	Y
GCA_001991515	Burkholderia	cenocepacia	Burkholderia	cenocepacia	Y	Y
GCA_001991535	Burkholderia	cenocepacia	Burkholderia	cenocepacia	Y	Y
GCA_001991555	Burkholderia	cenocepacia	Burkholderia	cenocepacia	Y	Y
GCA_001991565	Burkholderia	cenocepacia	Burkholderia	cenocepacia	Y	Y
GCA_001991595	Burkholderia	cenocepacia	Burkholderia	cenocepacia	Y	Y
GCA_001991615	Burkholderia	cenocepacia	Burkholderia	cenocepacia	Y	Y
GCA_001991625	Burkholderia	cenocepacia	Burkholderia	cenocepacia	Y	Y
GCA_001991655	Burkholderia	cenocepacia	Burkholderia	cenocepacia	Y	Y
GCA_001991665	Burkholderia	cenocepacia	Burkholderia	cenocepacia	Y	Y
GCA_001991695	Burkholderia	cenocepacia	Burkholderia	cenocepacia	Y	Y
GCA_001991715	Burkholderia	cenocepacia	Burkholderia	cenocepacia	Y	Y
GCA_001991735	Burkholderia	cenocepacia	Burkholderia	cenocepacia	Y	Y
GCA_001991755	Burkholderia	cenocepacia	Burkholderia	cenocepacia	Y	Y
GCA_001991795	Burkholderia	cenocepacia	Burkholderia	cenocepacia	Y	Y
GCA_001991815	Burkholderia	cenocepacia	Burkholderia	cenocepacia	Y	Y
GCA_001991835	Burkholderia	cenocepacia	Burkholderia	cenocepacia	Y	Y
GCA_001991845	Burkholderia	cenocepacia	Burkholderia	cenocepacia	Y	Y
GCA_001991875	Burkholderia	cenocepacia	Burkholderia	cenocepacia	Y	Y
GCA_001991885	Burkholderia	cenocepacia	Burkholderia	cenocepacia	Y	Y
GCA_001991915	Burkholderia	cenocepacia	Burkholderia	cenocepacia	Y	Y
GCA_001991935	Burkholderia	cenocepacia	Burkholderia	cenocepacia	Y	Y
GCA_001991975	Burkholderia	cenocepacia	Burkholderia	cenocepacia	Y	Y
GCA_001991995	Burkholderia	cenocepacia	Burkholderia	cenocepacia	Y	Y
GCA_001992005	Burkholderia	cenocepacia	Burkholderia	cenocepacia	Y	Y
GCA_001992035	Burkholderia	cenocepacia	Burkholderia	cenocepacia	Y	Y
GCA_001992045	Burkholderia	cenocepacia	Burkholderia	cenocepacia	Y	Y
GCA_001992075	Burkholderia	cenocepacia	Burkholderia	cenocepacia	Y	Y
GCA_001992095	Burkholderia	cenocepacia	Burkholderia	cenocepacia	Y	Y
GCA_001992115	Burkholderia	cenocepacia	Burkholderia	cenocepacia	Y	Y
GCA_001992135	Burkholderia	cenocepacia	Burkholderia	cenocepacia	Y	Y
GCA_001992155	Burkholderia	cenocepacia	Burkholderia	cenocepacia	Y	Y
GCA_001992165	Burkholderia	cenocepacia	Burkholderia	cenocepacia	Y	Y
GCA_001992195	Burkholderia	cenocepacia	Burkholderia	cenocepacia	Y	Y
GCA_001992205	Burkholderia	cenocepacia	Burkholderia	cenocepacia	Y	Y
GCA_001992225	Burkholderia	cenocepacia	Burkholderia	cenocepacia	Y	Y
GCA_001992255	Burkholderia	cenocepacia	Burkholderia	cenocepacia	Y	Y
GCA_001992275	Burkholderia	cenocepacia	Burkholderia	cenocepacia	Y	Y
GCA_001992285	Burkholderia	cenocepacia	Burkholderia	cenocepacia	Y	Y
GCA_001992315	Burkholderia	cenocepacia	Burkholderia	cenocepacia	Y	Y
GCA_001992335	Burkholderia	cenocepacia	Burkholderia	cenocepacia	Y	Y
GCA_001992345	Burkholderia	cenocepacia	Burkholderia	cenocepacia	Y	Y
GCA_001992375	Burkholderia	cenocepacia	Burkholderia	cenocepacia	Y	Y
GCA_001992385	Burkholderia	cenocepacia	Burkholderia	cenocepacia	Y	Y
GCA_001992395	Burkholderia	cenocepacia	Burkholderia	cenocepacia	Y	Y
GCA_001992435	Burkholderia	cenocepacia	Burkholderia	cenocepacia	Y	Y
GCA_001992445	Burkholderia	cenocepacia	Burkholderia	cenocepacia	Y	Y
GCA_001992475	Burkholderia	cenocepacia	Burkholderia	cenocepacia	Y	Y
GCA_001992495	Burkholderia	cenocepacia	Burkholderia	cenocepacia	Y	Y
GCA_001992505	Burkholderia	cenocepacia	Burkholderia	cenocepacia	Y	Y
GCA_001992535	Burkholderia	cenocepacia	Burkholderia	cenocepacia	Y	Y
GCA_001992555	Burkholderia	cenocepacia	Burkholderia	cenocepacia	Y	Y
GCA_001992565	Burkholderia	cenocepacia	Burkholderia	cenocepacia	Y	Y
GCA_001992595	Burkholderia	cenocepacia	Burkholderia	cenocepacia	Y	Y
GCA_001992765	Burkholderia	cenocepacia	Burkholderia	cenocepacia	Y	Y
GCA_001992785	Burkholderia	cenocepacia	Burkholderia	cenocepacia	Y	Y
GCA_001992815	Burkholderia	cenocepacia	Burkholderia	cenocepacia	Y	Y
GCA_001992825	Burkholderia	cenocepacia	Burkholderia	cenocepacia	Y	Y
GCA_001992855	Burkholderia	cenocepacia	Burkholderia	cenocepacia	Y	Y
GCA_001992875	Burkholderia	cenocepacia	Burkholderia	cenocepacia	Y	Y
GCA_001992895	Burkholderia	cenocepacia	Burkholderia	cenocepacia	Y	Y
GCA_001992915	Burkholderia	cenocepacia	Burkholderia	cenocepacia	Y	Y
GCA_001992925	Burkholderia	cenocepacia	Burkholderia	cenocepacia	Y	Y
GCA_001992955	Burkholderia	cenocepacia	Burkholderia	cenocepacia	Y	Y
GCA_001992965	Burkholderia	cenocepacia	Burkholderia	cenocepacia	Y	Y
GCA_001992995	Burkholderia	cenocepacia	Burkholderia	cenocepacia	Y	Y
GCA_001993005	Burkholderia	cenocepacia	Burkholderia	cenocepacia	Y	Y
GCA_001993035	Burkholderia	cenocepacia	Burkholderia	cenocepacia	Y	Y
GCA_001993055	Burkholderia	cenocepacia	Burkholderia	cenocepacia	Y	Y
GCA_001993075	Burkholderia	cenocepacia	Burkholderia	cenocepacia	Y	Y
GCA_001993095	Burkholderia	cenocepacia	Burkholderia	cenocepacia	Y	Y
GCA_001993115	Burkholderia	cenocepacia	Burkholderia	cenocepacia	Y	Y
GCA_001993135	Burkholderia	cenocepacia	Burkholderia	cenocepacia	Y	Y
GCA_001993155	Burkholderia	cenocepacia	Burkholderia	cenocepacia	Y	Y
GCA_001993175	Burkholderia	cenocepacia	Burkholderia	cenocepacia	Y	Y
GCA_001993185	Burkholderia	cenocepacia	Burkholderia	cenocepacia	Y	Y
GCA_001993215	Burkholderia	cenocepacia	Burkholderia	cenocepacia	Y	Y
GCA_001993235	Burkholderia	cenocepacia	Burkholderia	cenocepacia	Y	Y
GCA_001993255	Burkholderia	cenocepacia	Burkholderia	cenocepacia	Y	Y
GCA_001993295	Burkholderia	cenocepacia	Burkholderia	cenocepacia	Y	Y
GCA_001993315	Burkholderia	cenocepacia	Burkholderia	cenocepacia	Y	Y
GCA_001993335	Burkholderia	cenocepacia	Burkholderia	cenocepacia	Y	Y
GCA_001993355	Burkholderia	cenocepacia	Burkholderia	cenocepacia	Y	Y
GCA_001993375	Burkholderia	cenocepacia	Burkholderia	cenocepacia	Y	Y
GCA_001993395	Burkholderia	cenocepacia	Burkholderia	cenocepacia	Y	Y
GCA_001993415	Burkholderia	cenocepacia	Burkholderia	cenocepacia	Y	Y
GCA_001993435	Burkholderia	cenocepacia	Burkholderia	cenocepacia	Y	Y
GCA_001993455	Burkholderia	cenocepacia	Burkholderia	cenocepacia	Y	Y
GCA_001993475	Burkholderia	cenocepacia	Burkholderia	cenocepacia	Y	Y
GCA_001993495	Burkholderia	cenocepacia	Burkholderia	cenocepacia	Y	Y
GCA_001993535	Burkholderia	cenocepacia	Burkholderia	cenocepacia	Y	Y
GCA_001993555	Burkholderia	cenocepacia	Burkholderia	cenocepacia	Y	Y
GCA_001993565	Burkholderia	cenocepacia	Burkholderia	cenocepacia	Y	Y
GCA_001993635	Burkholderia	cenocepacia	Burkholderia	cenocepacia	Y	Y
GCA_001993645	Burkholderia	cenocepacia	Burkholderia	cenocepacia	Y	Y
GCA_001993675	Burkholderia	cenocepacia	Burkholderia	cenocepacia	Y	Y
GCA_001993685	Burkholderia	cenocepacia	Burkholderia	cenocepacia	Y	Y
GCA_001993715	Burkholderia	cenocepacia	Burkholderia	cenocepacia	Y	Y
GCA_001993725	Burkholderia	cenocepacia	Burkholderia	cenocepacia	Y	Y
GCA_001993755	Burkholderia	cenocepacia	Burkholderia	cenocepacia	Y	Y
GCA_001993765	Burkholderia	cenocepacia	Burkholderia	cenocepacia	Y	Y
GCA_001993795	Burkholderia	cenocepacia	Burkholderia	cenocepacia	Y	Y
GCA_001993805	Burkholderia	cenocepacia	Burkholderia	cenocepacia	Y	Y
GCA_001993825	Burkholderia	cenocepacia	Burkholderia	cenocepacia	Y	Y
GCA_001993855	Burkholderia	cenocepacia	Burkholderia	cenocepacia	Y	Y
GCA_001993875	Burkholderia	cenocepacia	Burkholderia	cenocepacia	Y	Y
GCA_001993895	Burkholderia	cenocepacia	Burkholderia	cenocepacia	Y	Y
GCA_001993905	Burkholderia	cenocepacia	Burkholderia	cenocepacia	Y	Y
GCA_001993925	Burkholderia	cenocepacia	Burkholderia	cenocepacia	Y	Y
GCA_001993945	Burkholderia	cenocepacia	Burkholderia	cenocepacia	Y	Y
GCA_001993975	Burkholderia	cenocepacia	Burkholderia	cenocepacia	Y	Y
GCA_001993985	Burkholderia	cenocepacia	Burkholderia	cenocepacia	Y	Y
GCA_001994025	Burkholderia	cenocepacia	Burkholderia	cenocepacia	Y	Y
GCA_001994035	Burkholderia	cenocepacia	Burkholderia	cenocepacia	Y	Y
GCA_001994075	Burkholderia	cenocepacia	Burkholderia	cenocepacia	Y	Y
GCA_001994085	Burkholderia	cenocepacia	Burkholderia	cenocepacia	Y	Y
GCA_001994115	Burkholderia	cenocepacia	Burkholderia	cenocepacia	Y	Y
GCA_001994135	Burkholderia	cenocepacia	Burkholderia	cenocepacia	Y	Y
GCA_001994145	Burkholderia	cenocepacia	Burkholderia	cenocepacia	Y	Y
GCA_001994165	Burkholderia	cenocepacia	Burkholderia	cenocepacia	Y	Y
GCA_001994195	Burkholderia	cenocepacia	Burkholderia	cenocepacia	Y	Y
GCA_001994205	Burkholderia	cenocepacia	Burkholderia	cenocepacia	Y	Y
GCA_001994215	Burkholderia	cenocepacia	Burkholderia	cenocepacia	Y	Y
GCA_001994255	Burkholderia	cenocepacia	Burkholderia	cenocepacia	Y	Y
GCA_001994265	Burkholderia	cenocepacia	Burkholderia	cenocepacia	Y	Y
GCA_001994285	Burkholderia	cenocepacia	Burkholderia	cenocepacia	Y	Y
GCA_001994315	Burkholderia	cenocepacia	Burkholderia	cenocepacia	Y	Y
GCA_001994335	Burkholderia	cenocepacia	Burkholderia	cenocepacia	Y	Y
GCA_001994345	Burkholderia	cenocepacia	Burkholderia	cenocepacia	Y	Y
GCA_001994375	Burkholderia	cenocepacia	Burkholderia	cenocepacia	Y	Y
GCA_001994395	Burkholderia	cenocepacia	Burkholderia	cenocepacia	Y	Y
GCA_001994405	Burkholderia	cenocepacia	Burkholderia	cenocepacia	Y	Y
GCA_001994435	Burkholderia	cenocepacia	Burkholderia	cenocepacia	Y	Y
GCA_001994445	Burkholderia	cenocepacia	Burkholderia	cenocepacia	Y	Y
GCA_001994475	Burkholderia	cenocepacia	Burkholderia	cenocepacia	Y	Y
GCA_001994495	Burkholderia	cenocepacia	Burkholderia	cenocepacia	Y	Y
GCA_001994505	Burkholderia	cenocepacia	Burkholderia	cenocepacia	Y	Y
GCA_001994535	Burkholderia	cenocepacia	Burkholderia	cenocepacia	Y	Y
GCA_001994545	Burkholderia	cenocepacia	Burkholderia	cenocepacia	Y	Y
GCA_001994555	Burkholderia	cenocepacia	Burkholderia	cenocepacia	Y	Y
GCA_001994595	Burkholderia	cenocepacia	Burkholderia	cenocepacia	Y	Y
GCA_001994605	Burkholderia	cenocepacia	Burkholderia	cenocepacia	Y	Y
GCA_001994615	Burkholderia	cenocepacia	Burkholderia	cenocepacia	Y	Y
GCA_001994655	Burkholderia	cenocepacia	Burkholderia	cenocepacia	Y	Y
GCA_001994665	Burkholderia	cenocepacia	Burkholderia	cenocepacia	Y	Y
GCA_001994695	Burkholderia	cenocepacia	Burkholderia	cenocepacia	Y	Y
GCA_001994715	Burkholderia	cenocepacia	Burkholderia	cenocepacia	Y	Y
GCA_001994735	Burkholderia	cenocepacia	Burkholderia	cenocepacia	Y	Y
GCA_001994755	Burkholderia	cenocepacia	Burkholderia	cenocepacia	Y	Y
GCA_001994775	Burkholderia	cenocepacia	Burkholderia	cenocepacia	Y	Y
GCA_001994795	Burkholderia	cenocepacia	Burkholderia	cenocepacia	Y	Y
GCA_001994815	Burkholderia	cenocepacia	Burkholderia	cenocepacia	Y	Y
GCA_001994835	Burkholderia	cenocepacia	Burkholderia	cenocepacia	Y	Y
GCA_001994855	Burkholderia	cenocepacia	Burkholderia	cenocepacia	Y	Y
GCA_001994875	Burkholderia	cenocepacia	Burkholderia	cenocepacia	Y	Y
GCA_001994895	Burkholderia	cenocepacia	Burkholderia	cenocepacia	Y	Y
GCA_001994915	Burkholderia	cenocepacia	Burkholderia	cenocepacia	Y	Y
GCA_001999805	Burkholderia	cenocepacia	Burkholderia	cenocepacia	Y	Y
GCA_001999885	Burkholderia	cenocepacia	Burkholderia	cenocepacia	Y	Y
GCA_001999925	Burkholderia	cenocepacia	Burkholderia	cenocepacia	Y	Y
GCA_002071875	Burkholderia	cenocepacia	Burkholderia	cenocepacia	Y	Y
GCA_002071885	Burkholderia	cenocepacia	Burkholderia	cenocepacia	Y	Y
GCA_002071905	Burkholderia	cenocepacia	Burkholderia	cenocepacia	Y	Y
GCA_002071935	Burkholderia	cenocepacia	Burkholderia	cenocepacia	Y	Y
GCA_002071945	Burkholderia	cenocepacia	Burkholderia	cenocepacia	Y	Y
GCA_002071955	Burkholderia	cenocepacia	Burkholderia	cenocepacia	Y	Y
GCA_002071995	Burkholderia	cenocepacia	Burkholderia	cenocepacia	Y	Y
GCA_002891135	Burkholderia	cenocepacia	Burkholderia	cenocepacia	Y	Y
GCA_002891255	Burkholderia	cenocepacia	Burkholderia	cenocepacia	Y	Y
GCA_002981275	Burkholderia	cenocepacia	Burkholderia	cenocepacia	Y	Y
GCA_002981785	Burkholderia	cenocepacia	Burkholderia	cenocepacia	Y	Y
GCA_003269225	Burkholderia	cenocepacia	Burkholderia	cenocepacia	Y	Y
GCA_003853985	Burkholderia	cenocepacia	Burkholderia	cenocepacia	Y	Y
GCA_003854475	Burkholderia	cenocepacia	Burkholderia	cenocepacia	Y	Y
GCA_003854545	Burkholderia	cenocepacia	Burkholderia	cenocepacia	Y	Y
GCA_003854595	Burkholderia	cenocepacia	Burkholderia	cenocepacia	Y	Y
GCA_003854695	Burkholderia	cenocepacia	Burkholderia	cenocepacia	Y	Y
GCA_003938695	Burkholderia	cenocepacia	Burkholderia	cenocepacia	Y	Y
GCA_003940705	Burkholderia	cenocepacia	Burkholderia	cenocepacia	Y	Y
GCA_004368725	Burkholderia	cenocepacia	Burkholderia	cenocepacia	Y	Y
GCA_010500755	Burkholderia	cenocepacia	Burkholderia	cenocepacia	Y	Y
GCA_011057215	Burkholderia	cenocepacia	Burkholderia	cenocepacia	Y	Y
GCA_013349105	Burkholderia	cenocepacia	Burkholderia	cenocepacia	Y	Y
GCA_014357995	Burkholderia	cenocepacia	Burkholderia	cenocepacia	Y	Y
GCA_900240025	Burkholderia	cenocepacia	Burkholderia	cenocepacia	Y	Y
GCA_900446165	Burkholderia	cenocepacia	Burkholderia	cenocepacia	Y	Y
GCA_900446195	Burkholderia	cenocepacia	Burkholderia	cenocepacia	Y	Y
GCA_900446215	Burkholderia	cenocepacia	Burkholderia	cenocepacia	Y	Y
GCA_902830355	Burkholderia	cenocepacia	Burkholderia	cenocepacia	Y	Y
GCA_902830385	Burkholderia	cenocepacia	Burkholderia	cenocepacia	Y	Y
GCA_902830435	Burkholderia	cenocepacia	Burkholderia	cenocepacia	Y	Y
GCA_902830455	Burkholderia	cenocepacia	Burkholderia	cenocepacia	Y	Y
GCA_902830465	Burkholderia	cenocepacia	Burkholderia	cenocepacia	Y	Y
GCA_902830515	Burkholderia	cenocepacia	Burkholderia	cenocepacia	Y	Y
GCA_902830575	Burkholderia	cenocepacia	Burkholderia	cenocepacia	Y	Y
GCA_002407525	Burkholderia	cepacia	Burkholderia	cepacia	Y	Y
GCA_000473485	Burkholderia	cepacia	Burkholderia	cepacia	Y	Y
GCA_001038835	Burkholderia	cepacia	Burkholderia	cepacia	Y	Y
GCA_001053975	Burkholderia	cepacia	Burkholderia	cepacia	Y	Y
GCA_001411495	Burkholderia	cepacia	Burkholderia	cepacia	Y	Y
GCA_001521915	Burkholderia	cepacia	Burkholderia	cepacia	Y	Y
GCA_001521975	Burkholderia	cepacia	Burkholderia	cepacia	Y	Y
GCA_001522215	Burkholderia	cepacia	Burkholderia	cepacia	Y	Y
GCA_001522295	Burkholderia	cepacia	Burkholderia	cepacia	Y	Y
GCA_001522305	Burkholderia	cepacia	Burkholderia	cepacia	Y	Y
GCA_001522335	Burkholderia	cepacia	Burkholderia	cepacia	Y	Y
GCA_001522525	Burkholderia	cepacia	Burkholderia	cepacia	Y	Y
GCA_001522575	Burkholderia	cepacia	Burkholderia	cepacia	Y	Y
GCA_001522625	Burkholderia	cepacia	Burkholderia	cepacia	Y	Y
GCA_001522695	Burkholderia	cepacia	Burkholderia	cepacia	Y	Y
GCA_001522785	Burkholderia	cepacia	Burkholderia	cepacia	Y	Y
GCA_001522805	Burkholderia	cepacia	Burkholderia	cepacia	Y	Y
GCA_001522815	Burkholderia	cepacia	Burkholderia	cepacia	Y	Y
GCA_001522875	Burkholderia	cepacia	Burkholderia	cepacia	Y	Y
GCA_001522925	Burkholderia	cepacia	Burkholderia	cepacia	Y	Y
GCA_001522945	Burkholderia	cepacia	Burkholderia	cepacia	Y	Y
GCA_001522965	Burkholderia	cepacia	Burkholderia	cepacia	Y	Y
GCA_001522985	Burkholderia	cepacia	Burkholderia	cepacia	Y	Y
GCA_001523085	Burkholderia	cepacia	Burkholderia	cepacia	Y	Y
GCA_001523685	Burkholderia	cepacia	Burkholderia	cepacia	Y	Y
GCA_001523985	Burkholderia	cepacia	Burkholderia	cepacia	Y	Y
GCA_001524125	Burkholderia	cepacia	Burkholderia	cepacia	Y	Y
GCA_001524665	Burkholderia	cepacia	Burkholderia	cepacia	Y	Y
GCA_001524765	Burkholderia	cepacia	Burkholderia	cepacia	Y	Y
GCA_001524835	Burkholderia	cepacia	Burkholderia	cepacia	Y	Y
GCA_001525765	Burkholderia	cepacia	Burkholderia	cepacia	Y	Y
GCA_001525775	Burkholderia	cepacia	Burkholderia	cepacia	Y	Y
GCA_001525785	Burkholderia	cepacia	Burkholderia	cepacia	Y	Y
GCA_001525895	Burkholderia	cepacia	Burkholderia	cepacia	Y	Y
GCA_001525925	Burkholderia	cepacia	Burkholderia	cepacia	Y	Y
GCA_001525945	Burkholderia	cepacia	Burkholderia	cepacia	Y	Y
GCA_001525965	Burkholderia	cepacia	Burkholderia	cepacia	Y	Y
GCA_001526205	Burkholderia	cepacia	Burkholderia	cepacia	Y	Y
GCA_001526255	Burkholderia	cepacia	Burkholderia	cepacia	Y	Y
GCA_001526345	Burkholderia	cepacia	Burkholderia	cepacia	Y	Y
GCA_001526445	Burkholderia	cepacia	Burkholderia	cepacia	Y	Y
GCA_001526755	Burkholderia	cepacia	Burkholderia	cepacia	Y	Y
GCA_001526785	Burkholderia	cepacia	Burkholderia	cepacia	Y	Y
GCA_001526905	Burkholderia	cepacia	Burkholderia	cepacia	Y	Y
GCA_001528485	Burkholderia	cepacia	Burkholderia	cepacia	Y	Y
GCA_001528675	Burkholderia	cepacia	Burkholderia	cepacia	Y	Y
GCA_001528685	Burkholderia	cepacia	Burkholderia	cepacia	Y	Y
GCA_001528845	Burkholderia	cepacia	Burkholderia	cepacia	Y	Y
GCA_001529145	Burkholderia	cepacia	Burkholderia	cepacia	Y	Y
GCA_001529525	Burkholderia	cepacia	Burkholderia	cepacia	Y	Y
GCA_001529685	Burkholderia	cepacia	Burkholderia	cepacia	Y	Y
GCA_001529755	Burkholderia	cepacia	Burkholderia	cepacia	Y	Y
GCA_001529825	Burkholderia	cepacia	Burkholderia	cepacia	Y	Y
GCA_001529885	Burkholderia	cepacia	Burkholderia	cepacia	Y	Y
GCA_001530005	Burkholderia	cepacia	Burkholderia	cepacia	Y	Y
GCA_001530045	Burkholderia	cepacia	Burkholderia	cepacia	Y	Y
GCA_001530055	Burkholderia	cepacia	Burkholderia	cepacia	Y	Y
GCA_001530085	Burkholderia	cepacia	Burkholderia	cepacia	Y	Y
GCA_001530105	Burkholderia	cepacia	Burkholderia	cepacia	Y	Y
GCA_001530135	Burkholderia	cepacia	Burkholderia	cepacia	Y	Y
GCA_001530185	Burkholderia	cepacia	Burkholderia	cepacia	Y	Y
GCA_001530205	Burkholderia	cepacia	Burkholderia	cepacia	Y	Y
GCA_001530415	Burkholderia	cepacia	Burkholderia	cepacia	Y	Y
GCA_001530665	Burkholderia	cepacia	Burkholderia	cepacia	Y	Y
GCA_001530785	Burkholderia	cepacia	Burkholderia	cepacia	Y	Y
GCA_001530805	Burkholderia	cepacia	Burkholderia	cepacia	Y	Y
GCA_001530905	Burkholderia	cepacia	Burkholderia	cepacia	Y	Y
GCA_001531505	Burkholderia	cepacia	Burkholderia	cepacia	Y	Y
GCA_001531525	Burkholderia	cepacia	Burkholderia	cepacia	Y	Y
GCA_001531875	Burkholderia	cepacia	Burkholderia	cepacia	Y	Y
GCA_001531905	Burkholderia	cepacia	Burkholderia	cepacia	Y	Y
GCA_001531915	Burkholderia	cepacia	Burkholderia	cepacia	Y	Y
GCA_001532125	Burkholderia	cepacia	Burkholderia	cepacia	Y	Y
GCA_001532235	Burkholderia	cepacia	Burkholderia	cepacia	Y	Y
GCA_001532525	Burkholderia	cepacia	Burkholderia	cepacia	Y	Y
GCA_001532555	Burkholderia	cepacia	Burkholderia	cepacia	Y	Y
GCA_001532705	Burkholderia	cepacia	Burkholderia	cepacia	Y	Y
GCA_001532885	Burkholderia	cepacia	Burkholderia	cepacia	Y	Y
GCA_001532955	Burkholderia	cepacia	Burkholderia	cepacia	Y	Y
GCA_001533295	Burkholderia	cepacia	Burkholderia	cepacia	Y	Y
GCA_001533445	Burkholderia	cepacia	Burkholderia	cepacia	Y	Y
GCA_001534085	Burkholderia	cepacia	Burkholderia	cepacia	Y	Y
GCA_001536795	Burkholderia	cepacia	Burkholderia	cepacia	Y	Y
GCA_001718395	Burkholderia	cepacia	Burkholderia	cepacia	Y	Y
GCA_002209085	Burkholderia	cepacia	Burkholderia	cepacia	Y	Y
GCA_002906895	Burkholderia	cepacia	Burkholderia	cepacia	Y	Y
GCA_002942785	Burkholderia	cepacia	Burkholderia	cepacia	Y	Y
GCA_003268125	Burkholderia	cepacia	Burkholderia	cepacia	Y	Y
GCA_003546465	Burkholderia	cepacia	Burkholderia	cepacia	Y	Y
GCA_003853765	Burkholderia	cepacia	Burkholderia	cepacia	Y	Y
GCA_003853915	Burkholderia	cepacia	Burkholderia	cepacia	Y	Y
GCA_003853955	Burkholderia	cepacia	Burkholderia	cepacia	Y	Y
GCA_003853975	Burkholderia	cepacia	Burkholderia	cepacia	Y	Y
GCA_003853995	Burkholderia	cepacia	Burkholderia	cepacia	Y	Y
GCA_003854415	Burkholderia	cepacia	Burkholderia	cepacia	Y	Y
GCA_003854425	Burkholderia	cepacia	Burkholderia	cepacia	Y	Y
GCA_003854435	Burkholderia	cepacia	Burkholderia	cepacia	Y	Y
GCA_003857475	Burkholderia	cepacia	Burkholderia	cepacia	Y	Y
GCA_003857515	Burkholderia	cepacia	Burkholderia	cepacia	Y	Y
GCA_003858065	Burkholderia	cepacia	Burkholderia	cepacia	Y	Y
GCA_003858175	Burkholderia	cepacia	Burkholderia	cepacia	Y	Y
GCA_003858185	Burkholderia	cepacia	Burkholderia	cepacia	Y	Y
GCA_003858195	Burkholderia	cepacia	Burkholderia	cepacia	Y	Y
GCA_003858205	Burkholderia	cepacia	Burkholderia	cepacia	Y	Y
GCA_004374695	Burkholderia	cepacia	Burkholderia	cepacia	Y	Y
GCA_004375605	Burkholderia	cepacia	Burkholderia	cepacia	Y	Y
GCA_004376135	Burkholderia	cepacia	Burkholderia	cepacia	Y	Y
GCA_004376865	Burkholderia	cepacia	Burkholderia	cepacia	Y	Y
GCA_004377105	Burkholderia	cepacia	Burkholderia	cepacia	Y	Y
GCA_004377495	Burkholderia	cepacia	Burkholderia	cepacia	Y	Y
GCA_004377615	Burkholderia	cepacia	Burkholderia	cepacia	Y	Y
GCA_004377645	Burkholderia	cepacia	Burkholderia	cepacia	Y	Y
GCA_004377675	Burkholderia	cepacia	Burkholderia	cepacia	Y	Y
GCA_004377685	Burkholderia	cepacia	Burkholderia	cepacia	Y	Y
GCA_004377745	Burkholderia	cepacia	Burkholderia	cepacia	Y	Y
GCA_004377805	Burkholderia	cepacia	Burkholderia	cepacia	Y	Y
GCA_004377815	Burkholderia	cepacia	Burkholderia	cepacia	Y	Y
GCA_004377825	Burkholderia	cepacia	Burkholderia	cepacia	Y	Y
GCA_004798465	Burkholderia	cepacia	Burkholderia	cepacia	Y	Y
GCA_006094315	Burkholderia	cepacia	Burkholderia	cepacia	Y	Y
GCA_007829215	Burkholderia	cepacia	Burkholderia	cepacia	Y	Y
GCA_009586235	Burkholderia	cepacia	Burkholderia	cepacia	Y	Y
GCA_011140355	Burkholderia	cepacia	Burkholderia	cepacia	Y	Y
GCA_012510315	Burkholderia	cepacia	Burkholderia	cepacia	Y	Y
GCA_013336605	Burkholderia	cepacia	Burkholderia	cepacia	Y	Y
GCA_013336635	Burkholderia	cepacia	Burkholderia	cepacia	Y	Y
GCA_014141625	Burkholderia	cepacia	Burkholderia	cepacia	Y	Y
GCA_014141955	Burkholderia	cepacia	Burkholderia	cepacia	Y	Y
GCA_014141995	Burkholderia	cepacia	Burkholderia	cepacia	Y	Y
GCA_014142045	Burkholderia	cepacia	Burkholderia	cepacia	Y	Y
GCA_014142065	Burkholderia	cepacia	Burkholderia	cepacia	Y	Y
GCA_014142075	Burkholderia	cepacia	Burkholderia	cepacia	Y	Y
GCA_014142095	Burkholderia	cepacia	Burkholderia	cepacia	Y	Y
GCA_014142175	Burkholderia	cepacia	Burkholderia	cepacia	Y	Y
GCA_014142185	Burkholderia	cepacia	Burkholderia	cepacia	Y	Y
GCA_014142285	Burkholderia	cepacia	Burkholderia	cepacia	Y	Y
GCA_014142305	Burkholderia	cepacia	Burkholderia	cepacia	Y	Y
GCA_014142315	Burkholderia	cepacia	Burkholderia	cepacia	Y	Y
GCA_014142325	Burkholderia	cepacia	Burkholderia	cepacia	Y	Y
GCA_014142385	Burkholderia	cepacia	Burkholderia	cepacia	Y	Y
GCA_014142395	Burkholderia	cepacia	Burkholderia	cepacia	Y	Y
GCA_014142465	Burkholderia	cepacia	Burkholderia	cepacia	Y	Y
GCA_014142475	Burkholderia	cepacia	Burkholderia	cepacia	Y	Y
GCA_014142565	Burkholderia	cepacia	Burkholderia	cepacia	Y	Y
GCA_014142595	Burkholderia	cepacia	Burkholderia	cepacia	Y	Y
GCA_900111715	Burkholderia	cepacia	Burkholderia	cepacia	Y	Y
GCA_900446175	Burkholderia	cepacia	Burkholderia	cepacia	Y	Y
GCA_900446185	Burkholderia	cepacia	Burkholderia	cepacia	Y	Y
GCA_902825095	Burkholderia	cepacia	Burkholderia	cepacia	Y	Y
GCA_902829425	Burkholderia	cepacia	Burkholderia	cepacia	Y	Y
GCA_902830615	Burkholderia	cepacia	Burkholderia	cepacia	Y	Y
GCA_902830625	Burkholderia	cepacia	Burkholderia	cepacia	Y	Y
GCA_902830635	Burkholderia	cepacia	Burkholderia	cepacia	Y	Y
GCA_902830645	Burkholderia	cepacia	Burkholderia	cepacia	Y	Y
GCA_902830655	Burkholderia	cepacia	Burkholderia	cepacia	Y	Y
GCA_902830665	Burkholderia	cepacia	Burkholderia	cepacia	Y	Y
GCA_902830675	Burkholderia	cepacia	Burkholderia	cepacia	Y	Y
GCA_902830685	Burkholderia	cepacia	Burkholderia	cepacia	Y	Y
GCA_902830695	Burkholderia	cepacia	Burkholderia	cepacia	Y	Y
GCA_902830705	Burkholderia	cepacia	Burkholderia	cepacia	Y	Y
GCA_902830715	Burkholderia	cepacia	Burkholderia	cepacia	Y	Y
GCA_902830735	Burkholderia	cepacia	Burkholderia	cepacia	Y	Y
GCA_902830745	Burkholderia	cepacia	Burkholderia	cepacia	Y	Y
GCA_902830755	Burkholderia	cepacia	Burkholderia	cepacia	Y	Y
GCA_902830765	Burkholderia	cepacia	Burkholderia	cepacia	Y	Y
GCA_902830785	Burkholderia	cepacia	Burkholderia	cepacia	Y	Y
GCA_902830795	Burkholderia	cepacia	Burkholderia	cepacia	Y	Y
GCA_902830805	Burkholderia	cepacia	Burkholderia	cepacia	Y	Y
GCA_001544535	Caballeronia	choica	Caballeronia	choica	Y	Y
GCA_001544615	Caballeronia	concitans	Caballeronia	concitans	Y	Y
GCA_000987055	Burkholderia	contaminans	Burkholderia	contaminans	Y	Y
GCA_000987075	Burkholderia	contaminans	Burkholderia	contaminans	Y	Y
GCA_001029145	Burkholderia	contaminans	Burkholderia	contaminans	Y	Y
GCA_001720405	Burkholderia	contaminans	Burkholderia	contaminans	Y	Y
GCA_001758385	Burkholderia	contaminans	Burkholderia	contaminans	Y	Y
GCA_001865715	Burkholderia	contaminans	Burkholderia	contaminans	Y	Y
GCA_002270525	Burkholderia	contaminans	Burkholderia	contaminans	Y	Y
GCA_002924455	Burkholderia	contaminans	Burkholderia	contaminans	Y	Y
GCA_002980735	Burkholderia	contaminans	Burkholderia	contaminans	Y	Y
GCA_002981225	Burkholderia	contaminans	Burkholderia	contaminans	Y	Y
GCA_003316785	Burkholderia	contaminans	Burkholderia	contaminans	Y	Y
GCA_003704285	Burkholderia	contaminans	Burkholderia	contaminans	Y	Y
GCA_003853875	Burkholderia	contaminans	Burkholderia	contaminans	Y	Y
GCA_003853895	Burkholderia	contaminans	Burkholderia	contaminans	Y	Y
GCA_003853905	Burkholderia	contaminans	Burkholderia	contaminans	Y	Y
GCA_003854375	Burkholderia	contaminans	Burkholderia	contaminans	Y	Y
GCA_003854385	Burkholderia	contaminans	Burkholderia	contaminans	Y	Y
GCA_004723625	Burkholderia	contaminans	Burkholderia	contaminans	Y	Y
GCA_007724625	Burkholderia	contaminans	Burkholderia	contaminans	Y	Y
GCA_009191525	Burkholderia	contaminans	Burkholderia	contaminans	Y	Y
GCA_009755625	Burkholderia	contaminans	Burkholderia	contaminans	Y	Y
GCA_014141665	Burkholderia	contaminans	Burkholderia	contaminans	Y	Y
GCA_014141685	Burkholderia	contaminans	Burkholderia	contaminans	Y	Y
GCA_014141725	Burkholderia	contaminans	Burkholderia	contaminans	Y	Y
GCA_014141755	Burkholderia	contaminans	Burkholderia	contaminans	Y	Y
GCA_014141865	Burkholderia	contaminans	Burkholderia	contaminans	Y	Y
GCA_014773305	Burkholderia	contaminans	Burkholderia	contaminans	Y	Y
GCA_902499085	Burkholderia	contaminans	Burkholderia	contaminans	Y	Y
GCA_902499195	Burkholderia	contaminans	Burkholderia	contaminans	Y	Y
GCA_902499225	Burkholderia	contaminans	Burkholderia	contaminans	Y	Y
GCA_902499255	Burkholderia	contaminans	Burkholderia	contaminans	Y	Y
GCA_902499265	Burkholderia	contaminans	Burkholderia	contaminans	Y	Y
GCA_902499285	Burkholderia	contaminans	Burkholderia	contaminans	Y	Y
GCA_902499325	Burkholderia	contaminans	Burkholderia	contaminans	Y	Y
GCA_902499345	Burkholderia	contaminans	Burkholderia	contaminans	Y	Y
GCA_902830725	Burkholderia	contaminans	Burkholderia	contaminans	Y	Y
GCA_902830775	Burkholderia	contaminans	Burkholderia	contaminans	Y	Y
GCA_902830835	Burkholderia	contaminans	Burkholderia	contaminans	Y	Y
GCA_902830845	Burkholderia	contaminans	Burkholderia	contaminans	Y	Y
GCA_902830865	Burkholderia	contaminans	Burkholderia	contaminans	Y	Y
GCA_902830875	Burkholderia	contaminans	Burkholderia	contaminans	Y	Y
GCA_001544575	Caballeronia	cordobensis	Caballeronia	cordobensis	Y	Y
GCA_001278535	Caballeronia	cordobensis	Caballeronia	cordobensis	Y	Y
GCA_003390925	Trinickia	diaoshuihuensis	Trinickia	diaoshuihuensis	Y	Y
GCA_900108945	Paraburkholderia	diazotrophica	Paraburkholderia	diazotrophica	Y	Y
GCA_008802145	Burkholderia	diffusa	Burkholderia	diffusa	Y	Y
GCA_902499115	Burkholderia	diffusa	Burkholderia	diffusa	Y	Y
GCA_902830815	Burkholderia	diffusa	Burkholderia	diffusa	Y	Y
GCA_902830825	Burkholderia	diffusa	Burkholderia	diffusa	Y	Y
GCA_902830855	Burkholderia	diffusa	Burkholderia	diffusa	Y	Y
GCA_000472525	Paraburkholderia	dilworthii	Paraburkholderia	dilworthii	Y	Y
GCA_003367175	Trinickia	dinghuensis	Trinickia	dinghuensis	Y	Y
GCA_004402975	Paraburkholderia	dipogonis	Paraburkholderia	dipogonis	Y	Y
GCA_000152585	Burkholderia	dolosa	Burkholderia	dolosa	Y	Y
GCA_000497165	Burkholderia	dolosa	Burkholderia	dolosa	Y	Y
GCA_000959505	Burkholderia	dolosa	Burkholderia	dolosa	Y	Y
GCA_003813045	Burkholderia	dolosa	Burkholderia	dolosa	Y	Y
GCA_902499135	Burkholderia	dolosa	Burkholderia	dolosa	Y	Y
GCA_902829575	Burkholderia	dolosa	Burkholderia	dolosa	Y	Y
GCA_002917095	Paraburkholderia	eburnea	Paraburkholderia	eburnea	Y	Y
GCA_003003375	Paraburkholderia	eburnea	Paraburkholderia	eburnea	Y	Y
GCA_002927045	Mycetohabitans	endofungorum	Mycetohabitans	endofungorum	Y	Y
GCA_000685035	Paraburkholderia	ferrariae	Paraburkholderia	ferrariae	Y	Y
GCA_009362735	Paraburkholderia	franconis	Paraburkholderia	franconis	Y	Y
GCA_000685055	Paraburkholderia	fungorum	Paraburkholderia	fungorum	Y	Y
GCA_000961515	Paraburkholderia	fungorum	Paraburkholderia	fungorum	Y	Y
GCA_002891075	Paraburkholderia	fungorum	Paraburkholderia	fungorum	Y	Y
GCA_003243335	Paraburkholderia	fungorum	Paraburkholderia	fungorum	Y	Y
GCA_013390345	Paraburkholderia	fungorum	Paraburkholderia	fungorum	Y	Y
GCA_014198855	Paraburkholderia	fungorum	Paraburkholderia	fungorum	Y	Y
GCA_014200165	Paraburkholderia	fungorum	Paraburkholderia	fungorum	Y	Y
GCA_014205755	Paraburkholderia	fungorum	Paraburkholderia	fungorum	Y	Y
GCA_900185605	Paraburkholderia	fungorum	Paraburkholderia	fungorum	Y	Y
GCA_902833645	Paraburkholderia	fungorum	Paraburkholderia	fungorum	Y	Y
GCA_003628145	Trinickia	fusca	Trinickia	fusca	Y	Y
GCA_902859935	Paraburkholderia	fynbosensis	Paraburkholderia	fynbosensis	Y	Y
GCA_000739735	Paraburkholderia	ginsengisoli	Paraburkholderia	ginsengisoli	Y	Y
GCA_001645125	Paraburkholderia	ginsengiterrae	Paraburkholderia	ginsengiterrae	Y	Y
GCA_001645135	Paraburkholderia	ginsengiterrae	Paraburkholderia	ginsengiterrae	Y	Y
GCA_000194745	Burkholderia	gladioli	Burkholderia	gladioli	Y	Y
GCA_000739755	Burkholderia	gladioli	Burkholderia	gladioli	Y	Y
GCA_000756855	Burkholderia	gladioli	Burkholderia	gladioli	Y	Y
GCA_000757585	Burkholderia	gladioli	Burkholderia	gladioli	Y	Y
GCA_000959725	Burkholderia	gladioli	Burkholderia	gladioli	Y	Y
GCA_000981885	Burkholderia	gladioli	Burkholderia	gladioli	Y	Y
GCA_001028765	Burkholderia	gladioli	Burkholderia	gladioli	Y	Y
GCA_001527485	Burkholderia	gladioli	Burkholderia	gladioli	Y	Y
GCA_002208175	Burkholderia	gladioli	Burkholderia	gladioli	Y	Y
GCA_002393425	Burkholderia	gladioli	Burkholderia	gladioli	Y	Y
GCA_002554225	Burkholderia	gladioli	Burkholderia	gladioli	Y	Y
GCA_002554395	Burkholderia	gladioli	Burkholderia	gladioli	Y	Y
GCA_002917905	Burkholderia	gladioli	Burkholderia	gladioli	Y	Y
GCA_002980955	Burkholderia	gladioli	Burkholderia	gladioli	Y	Y
GCA_002980975	Burkholderia	gladioli	Burkholderia	gladioli	Y	Y
GCA_002981405	Burkholderia	gladioli	Burkholderia	gladioli	Y	Y
GCA_002981475	Burkholderia	gladioli	Burkholderia	gladioli	Y	Y
GCA_002981875	Burkholderia	gladioli	Burkholderia	gladioli	Y	Y
GCA_003613595	Burkholderia	gladioli	Burkholderia	gladioli	Y	Y
GCA_003713105	Burkholderia	gladioli	Burkholderia	gladioli	Y	Y
GCA_009912275	Burkholderia	gladioli	Burkholderia	gladioli	Y	Y
GCA_011319435	Burkholderia	gladioli	Burkholderia	gladioli	Y	Y
GCA_013266815	Burkholderia	gladioli	Burkholderia	gladioli	Y	Y
GCA_013608115	Burkholderia	gladioli	Burkholderia	gladioli	Y	Y
GCA_014263355	Burkholderia	gladioli	Burkholderia	gladioli	Y	Y
GCA_900446225	Burkholderia	gladioli	Burkholderia	gladioli	Y	Y
GCA_900608515	Burkholderia	gladioli	Burkholderia	gladioli	Y	Y
GCA_900608525	Burkholderia	gladioli	Burkholderia	gladioli	Y	Y
GCA_900608535	Burkholderia	gladioli	Burkholderia	gladioli	Y	Y
GCA_900631635	Burkholderia	gladioli	Burkholderia	gladioli	Y	Y
GCA_902829325	Burkholderia	gladioli	Burkholderia	gladioli	Y	Y
GCA_902829345	Burkholderia	gladioli	Burkholderia	gladioli	Y	Y
GCA_902829355	Burkholderia	gladioli	Burkholderia	gladioli	Y	Y
GCA_902829365	Burkholderia	gladioli	Burkholderia	gladioli	Y	Y
GCA_902829385	Burkholderia	gladioli	Burkholderia	gladioli	Y	Y
GCA_902829405	Burkholderia	gladioli	Burkholderia	gladioli	Y	Y
GCA_902829485	Burkholderia	gladioli	Burkholderia	gladioli	Y	Y
GCA_902829495	Burkholderia	gladioli	Burkholderia	gladioli	Y	Y
GCA_902829505	Burkholderia	gladioli	Burkholderia	gladioli	Y	Y
GCA_902829525	Burkholderia	gladioli	Burkholderia	gladioli	Y	Y
GCA_902829535	Burkholderia	gladioli	Burkholderia	gladioli	Y	Y
GCA_902829545	Burkholderia	gladioli	Burkholderia	gladioli	Y	Y
GCA_902829555	Burkholderia	gladioli	Burkholderia	gladioli	Y	Y
GCA_902829585	Burkholderia	gladioli	Burkholderia	gladioli	Y	Y
GCA_902829615	Burkholderia	gladioli	Burkholderia	gladioli	Y	Y
GCA_902829635	Burkholderia	gladioli	Burkholderia	gladioli	Y	Y
GCA_902830185	Burkholderia	gladioli	Burkholderia	gladioli	Y	Y
GCA_902830195	Burkholderia	gladioli	Burkholderia	gladioli	Y	Y
GCA_902830215	Burkholderia	gladioli	Burkholderia	gladioli	Y	Y
GCA_902830235	Burkholderia	gladioli	Burkholderia	gladioli	Y	Y
GCA_902830245	Burkholderia	gladioli	Burkholderia	gladioli	Y	Y
GCA_902830885	Burkholderia	gladioli	Burkholderia	gladioli	Y	Y
GCA_902830895	Burkholderia	gladioli	Burkholderia	gladioli	Y	Y
GCA_902830905	Burkholderia	gladioli	Burkholderia	gladioli	Y	Y
GCA_902830915	Burkholderia	gladioli	Burkholderia	gladioli	Y	Y
GCA_902830925	Burkholderia	gladioli	Burkholderia	gladioli	Y	Y
GCA_902830935	Burkholderia	gladioli	Burkholderia	gladioli	Y	Y
GCA_902830945	Burkholderia	gladioli	Burkholderia	gladioli	Y	Y
GCA_902830955	Burkholderia	gladioli	Burkholderia	gladioli	Y	Y
GCA_902830965	Burkholderia	gladioli	Burkholderia	gladioli	Y	Y
GCA_902830975	Burkholderia	gladioli	Burkholderia	gladioli	Y	Y
GCA_902830985	Burkholderia	gladioli	Burkholderia	gladioli	Y	Y
GCA_902830995	Burkholderia	gladioli	Burkholderia	gladioli	Y	Y
GCA_902831005	Burkholderia	gladioli	Burkholderia	gladioli	Y	Y
GCA_902831015	Burkholderia	gladioli	Burkholderia	gladioli	Y	Y
GCA_902831025	Burkholderia	gladioli	Burkholderia	gladioli	Y	Y
GCA_902831035	Burkholderia	gladioli	Burkholderia	gladioli	Y	Y
GCA_902831045	Burkholderia	gladioli	Burkholderia	gladioli	Y	Y
GCA_902831055	Burkholderia	gladioli	Burkholderia	gladioli	Y	Y
GCA_902831065	Burkholderia	gladioli	Burkholderia	gladioli	Y	Y
GCA_902831075	Burkholderia	gladioli	Burkholderia	gladioli	Y	Y
GCA_902831085	Burkholderia	gladioli	Burkholderia	gladioli	Y	Y
GCA_902831095	Burkholderia	gladioli	Burkholderia	gladioli	Y	Y
GCA_902831105	Burkholderia	gladioli	Burkholderia	gladioli	Y	Y
GCA_902831115	Burkholderia	gladioli	Burkholderia	gladioli	Y	Y
GCA_902831125	Burkholderia	gladioli	Burkholderia	gladioli	Y	Y
GCA_902831135	Burkholderia	gladioli	Burkholderia	gladioli	Y	Y
GCA_902831145	Burkholderia	gladioli	Burkholderia	gladioli	Y	Y
GCA_902831155	Burkholderia	gladioli	Burkholderia	gladioli	Y	Y
GCA_902831165	Burkholderia	gladioli	Burkholderia	gladioli	Y	Y
GCA_902831175	Burkholderia	gladioli	Burkholderia	gladioli	Y	Y
GCA_902831185	Burkholderia	gladioli	Burkholderia	gladioli	Y	Y
GCA_902831195	Burkholderia	gladioli	Burkholderia	gladioli	Y	Y
GCA_902831205	Burkholderia	gladioli	Burkholderia	gladioli	Y	Y
GCA_902831215	Burkholderia	gladioli	Burkholderia	gladioli	Y	Y
GCA_902831225	Burkholderia	gladioli	Burkholderia	gladioli	Y	Y
GCA_902831235	Burkholderia	gladioli	Burkholderia	gladioli	Y	Y
GCA_902831245	Burkholderia	gladioli	Burkholderia	gladioli	Y	Y
GCA_902831255	Burkholderia	gladioli	Burkholderia	gladioli	Y	Y
GCA_902831265	Burkholderia	gladioli	Burkholderia	gladioli	Y	Y
GCA_902831275	Burkholderia	gladioli	Burkholderia	gladioli	Y	Y
GCA_902831285	Burkholderia	gladioli	Burkholderia	gladioli	Y	Y
GCA_902831295	Burkholderia	gladioli	Burkholderia	gladioli	Y	Y
GCA_902831305	Burkholderia	gladioli	Burkholderia	gladioli	Y	Y
GCA_902831315	Burkholderia	gladioli	Burkholderia	gladioli	Y	Y
GCA_902831325	Burkholderia	gladioli	Burkholderia	gladioli	Y	Y
GCA_902831335	Burkholderia	gladioli	Burkholderia	gladioli	Y	Y
GCA_902831345	Burkholderia	gladioli	Burkholderia	gladioli	Y	Y
GCA_902831355	Burkholderia	gladioli	Burkholderia	gladioli	Y	Y
GCA_902831365	Burkholderia	gladioli	Burkholderia	gladioli	Y	Y
GCA_902831375	Burkholderia	gladioli	Burkholderia	gladioli	Y	Y
GCA_902831385	Burkholderia	gladioli	Burkholderia	gladioli	Y	Y
GCA_902831395	Burkholderia	gladioli	Burkholderia	gladioli	Y	Y
GCA_902831405	Burkholderia	gladioli	Burkholderia	gladioli	Y	Y
GCA_902831415	Burkholderia	gladioli	Burkholderia	gladioli	Y	Y
GCA_902831425	Burkholderia	gladioli	Burkholderia	gladioli	Y	Y
GCA_902831435	Burkholderia	gladioli	Burkholderia	gladioli	Y	Y
GCA_902831445	Burkholderia	gladioli	Burkholderia	gladioli	Y	Y
GCA_902831455	Burkholderia	gladioli	Burkholderia	gladioli	Y	Y
GCA_902831465	Burkholderia	gladioli	Burkholderia	gladioli	Y	Y
GCA_902831475	Burkholderia	gladioli	Burkholderia	gladioli	Y	Y
GCA_902831485	Burkholderia	gladioli	Burkholderia	gladioli	Y	Y
GCA_902831495	Burkholderia	gladioli	Burkholderia	gladioli	Y	Y
GCA_902831505	Burkholderia	gladioli	Burkholderia	gladioli	Y	Y
GCA_902831515	Burkholderia	gladioli	Burkholderia	gladioli	Y	Y
GCA_902831525	Burkholderia	gladioli	Burkholderia	gladioli	Y	Y
GCA_902831535	Burkholderia	gladioli	Burkholderia	gladioli	Y	Y
GCA_902831545	Burkholderia	gladioli	Burkholderia	gladioli	Y	Y
GCA_902831555	Burkholderia	gladioli	Burkholderia	gladioli	Y	Y
GCA_902831565	Burkholderia	gladioli	Burkholderia	gladioli	Y	Y
GCA_902831575	Burkholderia	gladioli	Burkholderia	gladioli	Y	Y
GCA_902831585	Burkholderia	gladioli	Burkholderia	gladioli	Y	Y
GCA_902831595	Burkholderia	gladioli	Burkholderia	gladioli	Y	Y
GCA_902831605	Burkholderia	gladioli	Burkholderia	gladioli	Y	Y
GCA_902831615	Burkholderia	gladioli	Burkholderia	gladioli	Y	Y
GCA_902831625	Burkholderia	gladioli	Burkholderia	gladioli	Y	Y
GCA_902831635	Burkholderia	gladioli	Burkholderia	gladioli	Y	Y
GCA_902831645	Burkholderia	gladioli	Burkholderia	gladioli	Y	Y
GCA_902831655	Burkholderia	gladioli	Burkholderia	gladioli	Y	Y
GCA_902831665	Burkholderia	gladioli	Burkholderia	gladioli	Y	Y
GCA_902831675	Burkholderia	gladioli	Burkholderia	gladioli	Y	Y
GCA_902831685	Burkholderia	gladioli	Burkholderia	gladioli	Y	Y
GCA_902831695	Burkholderia	gladioli	Burkholderia	gladioli	Y	Y
GCA_902831705	Burkholderia	gladioli	Burkholderia	gladioli	Y	Y
GCA_902831715	Burkholderia	gladioli	Burkholderia	gladioli	Y	Y
GCA_902831735	Burkholderia	gladioli	Burkholderia	gladioli	Y	Y
GCA_902831745	Burkholderia	gladioli	Burkholderia	gladioli	Y	Y
GCA_902831755	Burkholderia	gladioli	Burkholderia	gladioli	Y	Y
GCA_902831765	Burkholderia	gladioli	Burkholderia	gladioli	Y	Y
GCA_902831775	Burkholderia	gladioli	Burkholderia	gladioli	Y	Y
GCA_902831785	Burkholderia	gladioli	Burkholderia	gladioli	Y	Y
GCA_902831795	Burkholderia	gladioli	Burkholderia	gladioli	Y	Y
GCA_902831805	Burkholderia	gladioli	Burkholderia	gladioli	Y	Y
GCA_902831815	Burkholderia	gladioli	Burkholderia	gladioli	Y	Y
GCA_902831825	Burkholderia	gladioli	Burkholderia	gladioli	Y	Y
GCA_902831835	Burkholderia	gladioli	Burkholderia	gladioli	Y	Y
GCA_902831845	Burkholderia	gladioli	Burkholderia	gladioli	Y	Y
GCA_902831855	Burkholderia	gladioli	Burkholderia	gladioli	Y	Y
GCA_902831865	Burkholderia	gladioli	Burkholderia	gladioli	Y	Y
GCA_902831875	Burkholderia	gladioli	Burkholderia	gladioli	Y	Y
GCA_902831885	Burkholderia	gladioli	Burkholderia	gladioli	Y	Y
GCA_902831895	Burkholderia	gladioli	Burkholderia	gladioli	Y	Y
GCA_902831905	Burkholderia	gladioli	Burkholderia	gladioli	Y	Y
GCA_902831915	Burkholderia	gladioli	Burkholderia	gladioli	Y	Y
GCA_902831925	Burkholderia	gladioli	Burkholderia	gladioli	Y	Y
GCA_902831935	Burkholderia	gladioli	Burkholderia	gladioli	Y	Y
GCA_902831945	Burkholderia	gladioli	Burkholderia	gladioli	Y	Y
GCA_902831955	Burkholderia	gladioli	Burkholderia	gladioli	Y	Y
GCA_902831965	Burkholderia	gladioli	Burkholderia	gladioli	Y	Y
GCA_902831975	Burkholderia	gladioli	Burkholderia	gladioli	Y	Y
GCA_902831985	Burkholderia	gladioli	Burkholderia	gladioli	Y	Y
GCA_902831995	Burkholderia	gladioli	Burkholderia	gladioli	Y	Y
GCA_902832005	Burkholderia	gladioli	Burkholderia	gladioli	Y	Y
GCA_902832015	Burkholderia	gladioli	Burkholderia	gladioli	Y	Y
GCA_902832025	Burkholderia	gladioli	Burkholderia	gladioli	Y	Y
GCA_902832035	Burkholderia	gladioli	Burkholderia	gladioli	Y	Y
GCA_902832045	Burkholderia	gladioli	Burkholderia	gladioli	Y	Y
GCA_902832055	Burkholderia	gladioli	Burkholderia	gladioli	Y	Y
GCA_902832065	Burkholderia	gladioli	Burkholderia	gladioli	Y	Y
GCA_902832075	Burkholderia	gladioli	Burkholderia	gladioli	Y	Y
GCA_902832085	Burkholderia	gladioli	Burkholderia	gladioli	Y	Y
GCA_902832095	Burkholderia	gladioli	Burkholderia	gladioli	Y	Y
GCA_902832105	Burkholderia	gladioli	Burkholderia	gladioli	Y	Y
GCA_902832115	Burkholderia	gladioli	Burkholderia	gladioli	Y	Y
GCA_902832125	Burkholderia	gladioli	Burkholderia	gladioli	Y	Y
GCA_902832135	Burkholderia	gladioli	Burkholderia	gladioli	Y	Y
GCA_902832145	Burkholderia	gladioli	Burkholderia	gladioli	Y	Y
GCA_902832155	Burkholderia	gladioli	Burkholderia	gladioli	Y	Y
GCA_902832165	Burkholderia	gladioli	Burkholderia	gladioli	Y	Y
GCA_902832175	Burkholderia	gladioli	Burkholderia	gladioli	Y	Y
GCA_902832185	Burkholderia	gladioli	Burkholderia	gladioli	Y	Y
GCA_902832195	Burkholderia	gladioli	Burkholderia	gladioli	Y	Y
GCA_902832205	Burkholderia	gladioli	Burkholderia	gladioli	Y	Y
GCA_902832215	Burkholderia	gladioli	Burkholderia	gladioli	Y	Y
GCA_902832225	Burkholderia	gladioli	Burkholderia	gladioli	Y	Y
GCA_902832235	Burkholderia	gladioli	Burkholderia	gladioli	Y	Y
GCA_902832245	Burkholderia	gladioli	Burkholderia	gladioli	Y	Y
GCA_902832255	Burkholderia	gladioli	Burkholderia	gladioli	Y	Y
GCA_902832265	Burkholderia	gladioli	Burkholderia	gladioli	Y	Y
GCA_902832275	Burkholderia	gladioli	Burkholderia	gladioli	Y	Y
GCA_902832285	Burkholderia	gladioli	Burkholderia	gladioli	Y	Y
GCA_902832295	Burkholderia	gladioli	Burkholderia	gladioli	Y	Y
GCA_902832305	Burkholderia	gladioli	Burkholderia	gladioli	Y	Y
GCA_902832315	Burkholderia	gladioli	Burkholderia	gladioli	Y	Y
GCA_902832325	Burkholderia	gladioli	Burkholderia	gladioli	Y	Y
GCA_902832335	Burkholderia	gladioli	Burkholderia	gladioli	Y	Y
GCA_902832345	Burkholderia	gladioli	Burkholderia	gladioli	Y	Y
GCA_902832355	Burkholderia	gladioli	Burkholderia	gladioli	Y	Y
GCA_902832365	Burkholderia	gladioli	Burkholderia	gladioli	Y	Y
GCA_902832375	Burkholderia	gladioli	Burkholderia	gladioli	Y	Y
GCA_902832385	Burkholderia	gladioli	Burkholderia	gladioli	Y	Y
GCA_902832395	Burkholderia	gladioli	Burkholderia	gladioli	Y	Y
GCA_902832405	Burkholderia	gladioli	Burkholderia	gladioli	Y	Y
GCA_902832415	Burkholderia	gladioli	Burkholderia	gladioli	Y	Y
GCA_902832425	Burkholderia	gladioli	Burkholderia	gladioli	Y	Y
GCA_902832435	Burkholderia	gladioli	Burkholderia	gladioli	Y	Y
GCA_902832445	Burkholderia	gladioli	Burkholderia	gladioli	Y	Y
GCA_902832455	Burkholderia	gladioli	Burkholderia	gladioli	Y	Y
GCA_902832465	Burkholderia	gladioli	Burkholderia	gladioli	Y	Y
GCA_902832475	Burkholderia	gladioli	Burkholderia	gladioli	Y	Y
GCA_902832485	Burkholderia	gladioli	Burkholderia	gladioli	Y	Y
GCA_902832495	Burkholderia	gladioli	Burkholderia	gladioli	Y	Y
GCA_902832505	Burkholderia	gladioli	Burkholderia	gladioli	Y	Y
GCA_902832515	Burkholderia	gladioli	Burkholderia	gladioli	Y	Y
GCA_902832525	Burkholderia	gladioli	Burkholderia	gladioli	Y	Y
GCA_902832535	Burkholderia	gladioli	Burkholderia	gladioli	Y	Y
GCA_902832545	Burkholderia	gladioli	Burkholderia	gladioli	Y	Y
GCA_902832555	Burkholderia	gladioli	Burkholderia	gladioli	Y	Y
GCA_902832565	Burkholderia	gladioli	Burkholderia	gladioli	Y	Y
GCA_902832575	Burkholderia	gladioli	Burkholderia	gladioli	Y	Y
GCA_902832585	Burkholderia	gladioli	Burkholderia	gladioli	Y	Y
GCA_902832595	Burkholderia	gladioli	Burkholderia	gladioli	Y	Y
GCA_902832605	Burkholderia	gladioli	Burkholderia	gladioli	Y	Y
GCA_902832615	Burkholderia	gladioli	Burkholderia	gladioli	Y	Y
GCA_902832625	Burkholderia	gladioli	Burkholderia	gladioli	Y	Y
GCA_902832635	Burkholderia	gladioli	Burkholderia	gladioli	Y	Y
GCA_902832645	Burkholderia	gladioli	Burkholderia	gladioli	Y	Y
GCA_902832655	Burkholderia	gladioli	Burkholderia	gladioli	Y	Y
GCA_902832665	Burkholderia	gladioli	Burkholderia	gladioli	Y	Y
GCA_902832675	Burkholderia	gladioli	Burkholderia	gladioli	Y	Y
GCA_902832685	Burkholderia	gladioli	Burkholderia	gladioli	Y	Y
GCA_902832695	Burkholderia	gladioli	Burkholderia	gladioli	Y	Y
GCA_902832705	Burkholderia	gladioli	Burkholderia	gladioli	Y	Y
GCA_902832715	Burkholderia	gladioli	Burkholderia	gladioli	Y	Y
GCA_902832725	Burkholderia	gladioli	Burkholderia	gladioli	Y	Y
GCA_902832735	Burkholderia	gladioli	Burkholderia	gladioli	Y	Y
GCA_902832745	Burkholderia	gladioli	Burkholderia	gladioli	Y	Y
GCA_902832785	Burkholderia	gladioli	Burkholderia	gladioli	Y	Y
GCA_000751215	Caballeronia	glathei	Caballeronia	glathei	Y	Y
GCA_000698595	Caballeronia	glathei	Caballeronia	glathei	Y	Y
GCA_902833485	Caballeronia	glathei	Caballeronia	glathei	Y	Y
GCA_001545035	Caballeronia	glebae	Caballeronia	glebae	Y	Y
GCA_000022645	Burkholderia	glumae	Burkholderia	glumae	Y	Y
GCA_000300395	Burkholderia	glumae	Burkholderia	glumae	Y	Y
GCA_000300755	Burkholderia	glumae	Burkholderia	glumae	Y	Y
GCA_000960995	Burkholderia	glumae	Burkholderia	glumae	Y	Y
GCA_002206305	Burkholderia	glumae	Burkholderia	glumae	Y	Y
GCA_003858055	Burkholderia	glumae	Burkholderia	glumae	Y	Y
GCA_009578005	Burkholderia	glumae	Burkholderia	glumae	Y	Y
GCA_009857095	Burkholderia	glumae	Burkholderia	glumae	Y	Y
GCA_009931375	Burkholderia	glumae	Burkholderia	glumae	Y	Y
GCA_012974245	Burkholderia	glumae	Burkholderia	glumae	Y	Y
GCA_013122645	Burkholderia	glumae	Burkholderia	glumae	Y	Y
GCA_013370285	Burkholderia	glumae	Burkholderia	glumae	Y	Y
GCA_902832765	Burkholderia	glumae	Burkholderia	glumae	Y	Y
GCA_000172415	Paraburkholderia	graminis	Paraburkholderia	graminis	Y	Y
GCA_003330785	Paraburkholderia	graminis	Paraburkholderia	graminis	Y	Y
GCA_902859785	Paraburkholderia	graminis	Paraburkholderia	graminis	Y	Y
GCA_000698555	Caballeronia	grimmiae	Caballeronia	grimmiae	Y	Y
GCA_014636375	Caballeronia	grimmiae	Caballeronia	grimmiae	Y	Y
GCA_004353905	Paraburkholderia	guartelaensis	Paraburkholderia	guartelaensis	Y	Y
GCA_009455685	Paraburkholderia	hayleyella	Paraburkholderia	hayleyella	Y	Y
GCA_000739775	Paraburkholderia	heleia	Paraburkholderia	heleia	Y	Y
GCA_000265115	Paraburkholderia	hospita	Paraburkholderia	hospita	Y	Y
GCA_002157285	Paraburkholderia	hospita	Paraburkholderia	hospita	Y	Y
GCA_002157295	Paraburkholderia	hospita	Paraburkholderia	hospita	Y	Y
GCA_002157305	Paraburkholderia	hospita	Paraburkholderia	hospita	Y	Y
GCA_002902965	Paraburkholderia	hospita	Paraburkholderia	hospita	Y	Y
GCA_003330805	Paraburkholderia	hospita	Paraburkholderia	hospita	Y	Y
GCA_900108355	Paraburkholderia	hospita	Paraburkholderia	hospita	Y	Y
GCA_900167965	Paraburkholderia	hospita	Paraburkholderia	hospita	Y	Y
GCA_900168175	Paraburkholderia	hospita	Paraburkholderia	hospita	Y	Y
GCA_902833685	Paraburkholderia	hospita	Paraburkholderia	hospita	Y	Y
GCA_001544475	Caballeronia	humi	Caballeronia	humi	Y	Y
GCA_902859855	Paraburkholderia	humisilvae	Paraburkholderia	humisilvae	Y	Y
GCA_001462435	Burkholderia	humptydooensis	Burkholderia	humptydooensis	Y	Y
GCA_002888035	Burkholderia	humptydooensis	Burkholderia	humptydooensis	Y	Y
GCA_002888095	Burkholderia	humptydooensis	Burkholderia	humptydooensis	Y	Y
GCA_000402035	Caballeronia	insecticola	Caballeronia	insecticola	Y	Y
GCA_000648925	Caballeronia	jiangsuensis	Caballeronia	jiangsuensis	Y	Y
GCA_001636975	Paraburkholderia	kirstenboschensis	Paraburkholderia	kirstenboschensis	Y	Y
GCA_000341045	Paraburkholderia	kururiensis	Paraburkholderia	kururiensis	Y	Y
GCA_000739795	Paraburkholderia	kururiensis	Paraburkholderia	kururiensis	Y	Y
GCA_003986935	Paraburkholderia	kururiensis	Paraburkholderia	kururiensis	Y	Y
GCA_902833705	Paraburkholderia	kururiensis	Paraburkholderia	kururiensis	Y	Y
GCA_003353175	Paraburkholderia	lacunae	Paraburkholderia	lacunae	Y	Y
GCA_000012945	Burkholderia	lata	Burkholderia	lata	Y	Y
GCA_009912215	Burkholderia	lata	Burkholderia	lata	Y	Y
GCA_902499005	Burkholderia	lata	Burkholderia	lata	Y	Y
GCA_902499055	Burkholderia	lata	Burkholderia	lata	Y	Y
GCA_902499145	Burkholderia	lata	Burkholderia	lata	Y	Y
GCA_902499245	Burkholderia	lata	Burkholderia	lata	Y	Y
GCA_902499315	Burkholderia	lata	Burkholderia	lata	Y	Y
GCA_902500455	Burkholderia	lata	Burkholderia	lata	Y	Y
GCA_902832775	Burkholderia	lata	Burkholderia	lata	Y	Y
GCA_008802135	Burkholderia	latens	Burkholderia	latens	Y	Y
GCA_902499045	Burkholderia	latens	Burkholderia	latens	Y	Y
GCA_902832755	Burkholderia	latens	Burkholderia	latens	Y	Y
GCA_902832795	Burkholderia	latens	Burkholderia	latens	Y	Y
GCA_900096975	Paraburkholderia	lycopersici	Paraburkholderia	lycopersici	Y	Y
GCA_009690905	Paraburkholderia	madseniana	Paraburkholderia	madseniana	Y	Y
GCA_000011705	Burkholderia	mallei	Burkholderia	mallei	Y	Y
GCA_000015465	Burkholderia	mallei	Burkholderia	mallei	Y	Y
GCA_000015605	Burkholderia	mallei	Burkholderia	mallei	Y	Y
GCA_000015625	Burkholderia	mallei	Burkholderia	mallei	Y	Y
GCA_000152305	Burkholderia	mallei	Burkholderia	mallei	Y	Y
GCA_000152385	Burkholderia	mallei	Burkholderia	mallei	Y	Y
GCA_000152405	Burkholderia	mallei	Burkholderia	mallei	Y	Y
GCA_000153085	Burkholderia	mallei	Burkholderia	mallei	Y	Y
GCA_000167635	Burkholderia	mallei	Burkholderia	mallei	Y	Y
GCA_000169875	Burkholderia	mallei	Burkholderia	mallei	Y	Y
GCA_000565365	Burkholderia	mallei	Burkholderia	mallei	Y	Y
GCA_000565385	Burkholderia	mallei	Burkholderia	mallei	Y	Y
GCA_000565405	Burkholderia	mallei	Burkholderia	mallei	Y	Y
GCA_000565425	Burkholderia	mallei	Burkholderia	mallei	Y	Y
GCA_000565445	Burkholderia	mallei	Burkholderia	mallei	Y	Y
GCA_000565465	Burkholderia	mallei	Burkholderia	mallei	Y	Y
GCA_000755785	Burkholderia	mallei	Burkholderia	mallei	Y	Y
GCA_000755845	Burkholderia	mallei	Burkholderia	mallei	Y	Y
GCA_000755865	Burkholderia	mallei	Burkholderia	mallei	Y	Y
GCA_000755885	Burkholderia	mallei	Burkholderia	mallei	Y	Y
GCA_000756025	Burkholderia	mallei	Burkholderia	mallei	Y	Y
GCA_000756865	Burkholderia	mallei	Burkholderia	mallei	Y	Y
GCA_000757315	Burkholderia	mallei	Burkholderia	mallei	Y	Y
GCA_000762285	Burkholderia	mallei	Burkholderia	mallei	Y	Y
GCA_000959165	Burkholderia	mallei	Burkholderia	mallei	Y	Y
GCA_000959405	Burkholderia	mallei	Burkholderia	mallei	Y	Y
GCA_000959465	Burkholderia	mallei	Burkholderia	mallei	Y	Y
GCA_000959485	Burkholderia	mallei	Burkholderia	mallei	Y	Y
GCA_000959585	Burkholderia	mallei	Burkholderia	mallei	Y	Y
GCA_000959625	Burkholderia	mallei	Burkholderia	mallei	Y	Y
GCA_000986905	Burkholderia	mallei	Burkholderia	mallei	Y	Y
GCA_001278925	Burkholderia	mallei	Burkholderia	mallei	Y	Y
GCA_001279165	Burkholderia	mallei	Burkholderia	mallei	Y	Y
GCA_001279175	Burkholderia	mallei	Burkholderia	mallei	Y	Y
GCA_001279185	Burkholderia	mallei	Burkholderia	mallei	Y	Y
GCA_001279195	Burkholderia	mallei	Burkholderia	mallei	Y	Y
GCA_001279245	Burkholderia	mallei	Burkholderia	mallei	Y	Y
GCA_001279255	Burkholderia	mallei	Burkholderia	mallei	Y	Y
GCA_001279265	Burkholderia	mallei	Burkholderia	mallei	Y	Y
GCA_001279275	Burkholderia	mallei	Burkholderia	mallei	Y	Y
GCA_001279325	Burkholderia	mallei	Burkholderia	mallei	Y	Y
GCA_001608335	Burkholderia	mallei	Burkholderia	mallei	Y	Y
GCA_001608345	Burkholderia	mallei	Burkholderia	mallei	Y	Y
GCA_001608365	Burkholderia	mallei	Burkholderia	mallei	Y	Y
GCA_001608415	Burkholderia	mallei	Burkholderia	mallei	Y	Y
GCA_001608455	Burkholderia	mallei	Burkholderia	mallei	Y	Y
GCA_001715185	Burkholderia	mallei	Burkholderia	mallei	Y	Y
GCA_001729545	Burkholderia	mallei	Burkholderia	mallei	Y	Y
GCA_001831355	Burkholderia	mallei	Burkholderia	mallei	Y	Y
GCA_001905275	Burkholderia	mallei	Burkholderia	mallei	Y	Y
GCA_002345985	Burkholderia	mallei	Burkholderia	mallei	Y	Y
GCA_002346005	Burkholderia	mallei	Burkholderia	mallei	Y	Y
GCA_002346025	Burkholderia	mallei	Burkholderia	mallei	Y	Y
GCA_002346045	Burkholderia	mallei	Burkholderia	mallei	Y	Y
GCA_002346065	Burkholderia	mallei	Burkholderia	mallei	Y	Y
GCA_002346085	Burkholderia	mallei	Burkholderia	mallei	Y	Y
GCA_002346105	Burkholderia	mallei	Burkholderia	mallei	Y	Y
GCA_002346125	Burkholderia	mallei	Burkholderia	mallei	Y	Y
GCA_002346145	Burkholderia	mallei	Burkholderia	mallei	Y	Y
GCA_002346165	Burkholderia	mallei	Burkholderia	mallei	Y	Y
GCA_002346185	Burkholderia	mallei	Burkholderia	mallei	Y	Y
GCA_002346205	Burkholderia	mallei	Burkholderia	mallei	Y	Y
GCA_002522985	Burkholderia	mallei	Burkholderia	mallei	Y	Y
GCA_003590125	Burkholderia	mallei	Burkholderia	mallei	Y	Y
GCA_003590185	Burkholderia	mallei	Burkholderia	mallei	Y	Y
GCA_003590195	Burkholderia	mallei	Burkholderia	mallei	Y	Y
GCA_003590205	Burkholderia	mallei	Burkholderia	mallei	Y	Y
GCA_003627585	Burkholderia	mallei	Burkholderia	mallei	Y	Y
GCA_003627595	Burkholderia	mallei	Burkholderia	mallei	Y	Y
GCA_003627635	Burkholderia	mallei	Burkholderia	mallei	Y	Y
GCA_003627645	Burkholderia	mallei	Burkholderia	mallei	Y	Y
GCA_003627655	Burkholderia	mallei	Burkholderia	mallei	Y	Y
GCA_003627695	Burkholderia	mallei	Burkholderia	mallei	Y	Y
GCA_003627705	Burkholderia	mallei	Burkholderia	mallei	Y	Y
GCA_003797295	Burkholderia	mallei	Burkholderia	mallei	Y	Y
GCA_003797995	Burkholderia	mallei	Burkholderia	mallei	Y	Y
GCA_003933015	Burkholderia	mallei	Burkholderia	mallei	Y	Y
GCA_003933025	Burkholderia	mallei	Burkholderia	mallei	Y	Y
GCA_003933035	Burkholderia	mallei	Burkholderia	mallei	Y	Y
GCA_003933045	Burkholderia	mallei	Burkholderia	mallei	Y	Y
GCA_900180415	Burkholderia	mallei	Burkholderia	mallei	Y	Y
GCA_900446235	Burkholderia	mallei	Burkholderia	mallei	Y	Y
GCA_900446245	Burkholderia	mallei	Burkholderia	mallei	Y	Y
GCA_001580565	Caballeronia	megalochromosomata	Caballeronia	megalochromosomata	Y	Y
GCA_007556815	Paraburkholderia	megapolitana	Paraburkholderia	megapolitana	Y	Y
GCA_900113825	Paraburkholderia	megapolitana	Paraburkholderia	megapolitana	Y	Y
GCA_001718555	Burkholderia	metallica	Burkholderia	metallica	Y	Y
GCA_003034145	Burkholderia	metallica	Burkholderia	metallica	Y	Y
GCA_902499065	Burkholderia	metallica	Burkholderia	metallica	Y	Y
GCA_902832805	Burkholderia	metallica	Burkholderia	metallica	Y	Y
GCA_902832815	Burkholderia	metallica	Burkholderia	metallica	Y	Y
GCA_902832845	Burkholderia	metallica	Burkholderia	metallica	Y	Y
GCA_000472825	Paraburkholderia	mimosarum	Paraburkholderia	mimosarum	Y	Y
GCA_000472845	Paraburkholderia	mimosarum	Paraburkholderia	mimosarum	Y	Y
GCA_000739815	Paraburkholderia	mimosarum	Paraburkholderia	mimosarum	Y	Y
GCA_902833725	Paraburkholderia	mimosarum	Paraburkholderia	mimosarum	Y	Y
GCA_001028175	Caballeronia	mineralivorans	Caballeronia	mineralivorans	Y	Y
GCA_001580545	Paraburkholderia	monticola	Paraburkholderia	monticola	Y	Y
GCA_000010545	Burkholderia	multivorans	Burkholderia	multivorans	Y	Y
GCA_000018505	Burkholderia	multivorans	Burkholderia	multivorans	Y	Y
GCA_000182255	Burkholderia	multivorans	Burkholderia	multivorans	Y	Y
GCA_000182275	Burkholderia	multivorans	Burkholderia	multivorans	Y	Y
GCA_000182295	Burkholderia	multivorans	Burkholderia	multivorans	Y	Y
GCA_000286555	Burkholderia	multivorans	Burkholderia	multivorans	Y	Y
GCA_000286575	Burkholderia	multivorans	Burkholderia	multivorans	Y	Y
GCA_000756005	Burkholderia	multivorans	Burkholderia	multivorans	Y	Y
GCA_000756965	Burkholderia	multivorans	Burkholderia	multivorans	Y	Y
GCA_000807815	Burkholderia	multivorans	Burkholderia	multivorans	Y	Y
GCA_000807825	Burkholderia	multivorans	Burkholderia	multivorans	Y	Y
GCA_000959525	Burkholderia	multivorans	Burkholderia	multivorans	Y	Y
GCA_001058485	Burkholderia	multivorans	Burkholderia	multivorans	Y	Y
GCA_001267755	Burkholderia	multivorans	Burkholderia	multivorans	Y	Y
GCA_001302465	Burkholderia	multivorans	Burkholderia	multivorans	Y	Y
GCA_001526715	Burkholderia	multivorans	Burkholderia	multivorans	Y	Y
GCA_001528045	Burkholderia	multivorans	Burkholderia	multivorans	Y	Y
GCA_001528425	Burkholderia	multivorans	Burkholderia	multivorans	Y	Y
GCA_001528605	Burkholderia	multivorans	Burkholderia	multivorans	Y	Y
GCA_001529795	Burkholderia	multivorans	Burkholderia	multivorans	Y	Y
GCA_001529925	Burkholderia	multivorans	Burkholderia	multivorans	Y	Y
GCA_001530485	Burkholderia	multivorans	Burkholderia	multivorans	Y	Y
GCA_001530985	Burkholderia	multivorans	Burkholderia	multivorans	Y	Y
GCA_001531425	Burkholderia	multivorans	Burkholderia	multivorans	Y	Y
GCA_001531955	Burkholderia	multivorans	Burkholderia	multivorans	Y	Y
GCA_001532145	Burkholderia	multivorans	Burkholderia	multivorans	Y	Y
GCA_001534105	Burkholderia	multivorans	Burkholderia	multivorans	Y	Y
GCA_001718755	Burkholderia	multivorans	Burkholderia	multivorans	Y	Y
GCA_001718995	Burkholderia	multivorans	Burkholderia	multivorans	Y	Y
GCA_002980655	Burkholderia	multivorans	Burkholderia	multivorans	Y	Y
GCA_002980675	Burkholderia	multivorans	Burkholderia	multivorans	Y	Y
GCA_002980695	Burkholderia	multivorans	Burkholderia	multivorans	Y	Y
GCA_002980715	Burkholderia	multivorans	Burkholderia	multivorans	Y	Y
GCA_002980775	Burkholderia	multivorans	Burkholderia	multivorans	Y	Y
GCA_002980785	Burkholderia	multivorans	Burkholderia	multivorans	Y	Y
GCA_002980815	Burkholderia	multivorans	Burkholderia	multivorans	Y	Y
GCA_002980825	Burkholderia	multivorans	Burkholderia	multivorans	Y	Y
GCA_002980855	Burkholderia	multivorans	Burkholderia	multivorans	Y	Y
GCA_002980875	Burkholderia	multivorans	Burkholderia	multivorans	Y	Y
GCA_002980895	Burkholderia	multivorans	Burkholderia	multivorans	Y	Y
GCA_002980905	Burkholderia	multivorans	Burkholderia	multivorans	Y	Y
GCA_002980935	Burkholderia	multivorans	Burkholderia	multivorans	Y	Y
GCA_002980995	Burkholderia	multivorans	Burkholderia	multivorans	Y	Y
GCA_002981015	Burkholderia	multivorans	Burkholderia	multivorans	Y	Y
GCA_002981035	Burkholderia	multivorans	Burkholderia	multivorans	Y	Y
GCA_002981075	Burkholderia	multivorans	Burkholderia	multivorans	Y	Y
GCA_002981095	Burkholderia	multivorans	Burkholderia	multivorans	Y	Y
GCA_002981135	Burkholderia	multivorans	Burkholderia	multivorans	Y	Y
GCA_002981145	Burkholderia	multivorans	Burkholderia	multivorans	Y	Y
GCA_002981155	Burkholderia	multivorans	Burkholderia	multivorans	Y	Y
GCA_002981195	Burkholderia	multivorans	Burkholderia	multivorans	Y	Y
GCA_002981215	Burkholderia	multivorans	Burkholderia	multivorans	Y	Y
GCA_002981255	Burkholderia	multivorans	Burkholderia	multivorans	Y	Y
GCA_002981295	Burkholderia	multivorans	Burkholderia	multivorans	Y	Y
GCA_002981315	Burkholderia	multivorans	Burkholderia	multivorans	Y	Y
GCA_002981325	Burkholderia	multivorans	Burkholderia	multivorans	Y	Y
GCA_002981335	Burkholderia	multivorans	Burkholderia	multivorans	Y	Y
GCA_002981375	Burkholderia	multivorans	Burkholderia	multivorans	Y	Y
GCA_002981395	Burkholderia	multivorans	Burkholderia	multivorans	Y	Y
GCA_002981415	Burkholderia	multivorans	Burkholderia	multivorans	Y	Y
GCA_002981455	Burkholderia	multivorans	Burkholderia	multivorans	Y	Y
GCA_002981485	Burkholderia	multivorans	Burkholderia	multivorans	Y	Y
GCA_002981515	Burkholderia	multivorans	Burkholderia	multivorans	Y	Y
GCA_002981535	Burkholderia	multivorans	Burkholderia	multivorans	Y	Y
GCA_002981555	Burkholderia	multivorans	Burkholderia	multivorans	Y	Y
GCA_002981595	Burkholderia	multivorans	Burkholderia	multivorans	Y	Y
GCA_002981615	Burkholderia	multivorans	Burkholderia	multivorans	Y	Y
GCA_002981635	Burkholderia	multivorans	Burkholderia	multivorans	Y	Y
GCA_002981675	Burkholderia	multivorans	Burkholderia	multivorans	Y	Y
GCA_002981695	Burkholderia	multivorans	Burkholderia	multivorans	Y	Y
GCA_002981715	Burkholderia	multivorans	Burkholderia	multivorans	Y	Y
GCA_002981725	Burkholderia	multivorans	Burkholderia	multivorans	Y	Y
GCA_002981755	Burkholderia	multivorans	Burkholderia	multivorans	Y	Y
GCA_002981775	Burkholderia	multivorans	Burkholderia	multivorans	Y	Y
GCA_002981815	Burkholderia	multivorans	Burkholderia	multivorans	Y	Y
GCA_002981835	Burkholderia	multivorans	Burkholderia	multivorans	Y	Y
GCA_002981845	Burkholderia	multivorans	Burkholderia	multivorans	Y	Y
GCA_003019965	Burkholderia	multivorans	Burkholderia	multivorans	Y	Y
GCA_003048355	Burkholderia	multivorans	Burkholderia	multivorans	Y	Y
GCA_003255935	Burkholderia	multivorans	Burkholderia	multivorans	Y	Y
GCA_003255945	Burkholderia	multivorans	Burkholderia	multivorans	Y	Y
GCA_003255985	Burkholderia	multivorans	Burkholderia	multivorans	Y	Y
GCA_003256005	Burkholderia	multivorans	Burkholderia	multivorans	Y	Y
GCA_003256015	Burkholderia	multivorans	Burkholderia	multivorans	Y	Y
GCA_003256055	Burkholderia	multivorans	Burkholderia	multivorans	Y	Y
GCA_003256075	Burkholderia	multivorans	Burkholderia	multivorans	Y	Y
GCA_003256095	Burkholderia	multivorans	Burkholderia	multivorans	Y	Y
GCA_003256105	Burkholderia	multivorans	Burkholderia	multivorans	Y	Y
GCA_003256115	Burkholderia	multivorans	Burkholderia	multivorans	Y	Y
GCA_003256145	Burkholderia	multivorans	Burkholderia	multivorans	Y	Y
GCA_003256175	Burkholderia	multivorans	Burkholderia	multivorans	Y	Y
GCA_003256185	Burkholderia	multivorans	Burkholderia	multivorans	Y	Y
GCA_003256195	Burkholderia	multivorans	Burkholderia	multivorans	Y	Y
GCA_003256225	Burkholderia	multivorans	Burkholderia	multivorans	Y	Y
GCA_003256255	Burkholderia	multivorans	Burkholderia	multivorans	Y	Y
GCA_003256275	Burkholderia	multivorans	Burkholderia	multivorans	Y	Y
GCA_003256285	Burkholderia	multivorans	Burkholderia	multivorans	Y	Y
GCA_003256305	Burkholderia	multivorans	Burkholderia	multivorans	Y	Y
GCA_003256335	Burkholderia	multivorans	Burkholderia	multivorans	Y	Y
GCA_003256355	Burkholderia	multivorans	Burkholderia	multivorans	Y	Y
GCA_003256365	Burkholderia	multivorans	Burkholderia	multivorans	Y	Y
GCA_003256395	Burkholderia	multivorans	Burkholderia	multivorans	Y	Y
GCA_003256475	Burkholderia	multivorans	Burkholderia	multivorans	Y	Y
GCA_003256485	Burkholderia	multivorans	Burkholderia	multivorans	Y	Y
GCA_003256515	Burkholderia	multivorans	Burkholderia	multivorans	Y	Y
GCA_003256545	Burkholderia	multivorans	Burkholderia	multivorans	Y	Y
GCA_003256565	Burkholderia	multivorans	Burkholderia	multivorans	Y	Y
GCA_003256615	Burkholderia	multivorans	Burkholderia	multivorans	Y	Y
GCA_003256655	Burkholderia	multivorans	Burkholderia	multivorans	Y	Y
GCA_003256685	Burkholderia	multivorans	Burkholderia	multivorans	Y	Y
GCA_003256695	Burkholderia	multivorans	Burkholderia	multivorans	Y	Y
GCA_003256725	Burkholderia	multivorans	Burkholderia	multivorans	Y	Y
GCA_003256735	Burkholderia	multivorans	Burkholderia	multivorans	Y	Y
GCA_003256765	Burkholderia	multivorans	Burkholderia	multivorans	Y	Y
GCA_003256775	Burkholderia	multivorans	Burkholderia	multivorans	Y	Y
GCA_003256805	Burkholderia	multivorans	Burkholderia	multivorans	Y	Y
GCA_003256835	Burkholderia	multivorans	Burkholderia	multivorans	Y	Y
GCA_003256855	Burkholderia	multivorans	Burkholderia	multivorans	Y	Y
GCA_003256865	Burkholderia	multivorans	Burkholderia	multivorans	Y	Y
GCA_003256895	Burkholderia	multivorans	Burkholderia	multivorans	Y	Y
GCA_003256905	Burkholderia	multivorans	Burkholderia	multivorans	Y	Y
GCA_003256915	Burkholderia	multivorans	Burkholderia	multivorans	Y	Y
GCA_003256935	Burkholderia	multivorans	Burkholderia	multivorans	Y	Y
GCA_003256975	Burkholderia	multivorans	Burkholderia	multivorans	Y	Y
GCA_003256985	Burkholderia	multivorans	Burkholderia	multivorans	Y	Y
GCA_003256995	Burkholderia	multivorans	Burkholderia	multivorans	Y	Y
GCA_003257005	Burkholderia	multivorans	Burkholderia	multivorans	Y	Y
GCA_003257055	Burkholderia	multivorans	Burkholderia	multivorans	Y	Y
GCA_003257075	Burkholderia	multivorans	Burkholderia	multivorans	Y	Y
GCA_003257085	Burkholderia	multivorans	Burkholderia	multivorans	Y	Y
GCA_003257095	Burkholderia	multivorans	Burkholderia	multivorans	Y	Y
GCA_003257135	Burkholderia	multivorans	Burkholderia	multivorans	Y	Y
GCA_003257155	Burkholderia	multivorans	Burkholderia	multivorans	Y	Y
GCA_003257165	Burkholderia	multivorans	Burkholderia	multivorans	Y	Y
GCA_003257175	Burkholderia	multivorans	Burkholderia	multivorans	Y	Y
GCA_003257205	Burkholderia	multivorans	Burkholderia	multivorans	Y	Y
GCA_003257235	Burkholderia	multivorans	Burkholderia	multivorans	Y	Y
GCA_003257255	Burkholderia	multivorans	Burkholderia	multivorans	Y	Y
GCA_003257275	Burkholderia	multivorans	Burkholderia	multivorans	Y	Y
GCA_003257295	Burkholderia	multivorans	Burkholderia	multivorans	Y	Y
GCA_003257325	Burkholderia	multivorans	Burkholderia	multivorans	Y	Y
GCA_003257345	Burkholderia	multivorans	Burkholderia	multivorans	Y	Y
GCA_003257365	Burkholderia	multivorans	Burkholderia	multivorans	Y	Y
GCA_003257375	Burkholderia	multivorans	Burkholderia	multivorans	Y	Y
GCA_003257405	Burkholderia	multivorans	Burkholderia	multivorans	Y	Y
GCA_003257435	Burkholderia	multivorans	Burkholderia	multivorans	Y	Y
GCA_003257445	Burkholderia	multivorans	Burkholderia	multivorans	Y	Y
GCA_003257475	Burkholderia	multivorans	Burkholderia	multivorans	Y	Y
GCA_003257495	Burkholderia	multivorans	Burkholderia	multivorans	Y	Y
GCA_003257515	Burkholderia	multivorans	Burkholderia	multivorans	Y	Y
GCA_003257525	Burkholderia	multivorans	Burkholderia	multivorans	Y	Y
GCA_003257545	Burkholderia	multivorans	Burkholderia	multivorans	Y	Y
GCA_003257575	Burkholderia	multivorans	Burkholderia	multivorans	Y	Y
GCA_003257595	Burkholderia	multivorans	Burkholderia	multivorans	Y	Y
GCA_003257625	Burkholderia	multivorans	Burkholderia	multivorans	Y	Y
GCA_003257635	Burkholderia	multivorans	Burkholderia	multivorans	Y	Y
GCA_003257665	Burkholderia	multivorans	Burkholderia	multivorans	Y	Y
GCA_003257685	Burkholderia	multivorans	Burkholderia	multivorans	Y	Y
GCA_003257705	Burkholderia	multivorans	Burkholderia	multivorans	Y	Y
GCA_003257725	Burkholderia	multivorans	Burkholderia	multivorans	Y	Y
GCA_003257755	Burkholderia	multivorans	Burkholderia	multivorans	Y	Y
GCA_003257765	Burkholderia	multivorans	Burkholderia	multivorans	Y	Y
GCA_003257805	Burkholderia	multivorans	Burkholderia	multivorans	Y	Y
GCA_003257825	Burkholderia	multivorans	Burkholderia	multivorans	Y	Y
GCA_003257845	Burkholderia	multivorans	Burkholderia	multivorans	Y	Y
GCA_003257865	Burkholderia	multivorans	Burkholderia	multivorans	Y	Y
GCA_003257885	Burkholderia	multivorans	Burkholderia	multivorans	Y	Y
GCA_003257915	Burkholderia	multivorans	Burkholderia	multivorans	Y	Y
GCA_003257935	Burkholderia	multivorans	Burkholderia	multivorans	Y	Y
GCA_003257955	Burkholderia	multivorans	Burkholderia	multivorans	Y	Y
GCA_003257985	Burkholderia	multivorans	Burkholderia	multivorans	Y	Y
GCA_003257995	Burkholderia	multivorans	Burkholderia	multivorans	Y	Y
GCA_003258005	Burkholderia	multivorans	Burkholderia	multivorans	Y	Y
GCA_003258055	Burkholderia	multivorans	Burkholderia	multivorans	Y	Y
GCA_003258065	Burkholderia	multivorans	Burkholderia	multivorans	Y	Y
GCA_003258075	Burkholderia	multivorans	Burkholderia	multivorans	Y	Y
GCA_003258115	Burkholderia	multivorans	Burkholderia	multivorans	Y	Y
GCA_003258135	Burkholderia	multivorans	Burkholderia	multivorans	Y	Y
GCA_003258145	Burkholderia	multivorans	Burkholderia	multivorans	Y	Y
GCA_003258155	Burkholderia	multivorans	Burkholderia	multivorans	Y	Y
GCA_003258535	Burkholderia	multivorans	Burkholderia	multivorans	Y	Y
GCA_003812365	Burkholderia	multivorans	Burkholderia	multivorans	Y	Y
GCA_003812585	Burkholderia	multivorans	Burkholderia	multivorans	Y	Y
GCA_003938705	Burkholderia	multivorans	Burkholderia	multivorans	Y	Y
GCA_008693485	Burkholderia	multivorans	Burkholderia	multivorans	Y	Y
GCA_008693525	Burkholderia	multivorans	Burkholderia	multivorans	Y	Y
GCA_009730035	Burkholderia	multivorans	Burkholderia	multivorans	Y	Y
GCA_009730175	Burkholderia	multivorans	Burkholderia	multivorans	Y	Y
GCA_009730195	Burkholderia	multivorans	Burkholderia	multivorans	Y	Y
GCA_011043675	Burkholderia	multivorans	Burkholderia	multivorans	Y	Y
GCA_012272655	Burkholderia	multivorans	Burkholderia	multivorans	Y	Y
GCA_900079435	Burkholderia	multivorans	Burkholderia	multivorans	Y	Y
GCA_900079455	Burkholderia	multivorans	Burkholderia	multivorans	Y	Y
GCA_900079465	Burkholderia	multivorans	Burkholderia	multivorans	Y	Y
GCA_900079495	Burkholderia	multivorans	Burkholderia	multivorans	Y	Y
GCA_900079525	Burkholderia	multivorans	Burkholderia	multivorans	Y	Y
GCA_900079585	Burkholderia	multivorans	Burkholderia	multivorans	Y	Y
GCA_900079595	Burkholderia	multivorans	Burkholderia	multivorans	Y	Y
GCA_900079605	Burkholderia	multivorans	Burkholderia	multivorans	Y	Y
GCA_900446205	Burkholderia	multivorans	Burkholderia	multivorans	Y	Y
GCA_902830305	Burkholderia	multivorans	Burkholderia	multivorans	Y	Y
GCA_902832825	Burkholderia	multivorans	Burkholderia	multivorans	Y	Y
GCA_902832835	Burkholderia	multivorans	Burkholderia	multivorans	Y	Y
GCA_902832855	Burkholderia	multivorans	Burkholderia	multivorans	Y	Y
GCA_902832875	Burkholderia	multivorans	Burkholderia	multivorans	Y	Y
GCA_902832915	Burkholderia	multivorans	Burkholderia	multivorans	Y	Y
GCA_902832965	Burkholderia	multivorans	Burkholderia	multivorans	Y	Y
GCA_902832975	Burkholderia	multivorans	Burkholderia	multivorans	Y	Y
GCA_902833015	Burkholderia	multivorans	Burkholderia	multivorans	Y	Y
GCA_902833025	Burkholderia	multivorans	Burkholderia	multivorans	Y	Y
GCA_902833805	Burkholderia	multivorans	Burkholderia	multivorans	Y	Y
GCA_902833835	Burkholderia	multivorans	Burkholderia	multivorans	Y	Y
GCA_902833855	Burkholderia	multivorans	Burkholderia	multivorans	Y	Y
GCA_902833875	Burkholderia	multivorans	Burkholderia	multivorans	Y	Y
GCA_902833885	Burkholderia	multivorans	Burkholderia	multivorans	Y	Y
GCA_902833895	Burkholderia	multivorans	Burkholderia	multivorans	Y	Y
GCA_902833915	Burkholderia	multivorans	Burkholderia	multivorans	Y	Y
GCA_000519185	Paraburkholderia	nodosa	Paraburkholderia	nodosa	Y	Y
GCA_000170355	Burkholderia	oklahomensis	Burkholderia	oklahomensis	Y	Y
GCA_000170375	Burkholderia	oklahomensis	Burkholderia	oklahomensis	Y	Y
GCA_000755985	Burkholderia	oklahomensis	Burkholderia	oklahomensis	Y	Y
GCA_000959365	Burkholderia	oklahomensis	Burkholderia	oklahomensis	Y	Y
GCA_001522105	Burkholderia	oklahomensis	Burkholderia	oklahomensis	Y	Y
GCA_001522135	Burkholderia	oklahomensis	Burkholderia	oklahomensis	Y	Y
GCA_900446275	Burkholderia	oklahomensis	Burkholderia	oklahomensis	Y	Y
GCA_900608545	Burkholderia	oklahomensis	Burkholderia	oklahomensis	Y	Y
GCA_902829515	Burkholderia	oklahomensis	Burkholderia	oklahomensis	Y	Y
GCA_000685075	Paraburkholderia	oxyphila	Paraburkholderia	oxyphila	Y	Y
GCA_000732615	Burkholderia	paludis	Burkholderia	paludis	Y	Y
GCA_902499105	Burkholderia	paludis	Burkholderia	paludis	Y	Y
GCA_902859865	Burkholderia	paludis	Burkholderia	paludis	Y	Y
GCA_001544915	Caballeronia	pedi	Caballeronia	pedi	Y	Y
GCA_001544595	Caballeronia	peredens	Caballeronia	peredens	Y	Y
GCA_900100735	Paraburkholderia	phenazinium	Paraburkholderia	phenazinium	Y	Y
GCA_902829745	Paraburkholderia	phenazinium	Paraburkholderia	phenazinium	Y	Y
GCA_902833675	Paraburkholderia	phenazinium	Paraburkholderia	phenazinium	Y	Y
GCA_000300095	Paraburkholderia	phenoliruptrix	Paraburkholderia	phenoliruptrix	Y	Y
GCA_000416445	Paraburkholderia	phenoliruptrix	Paraburkholderia	phenoliruptrix	Y	Y
GCA_902833655	Paraburkholderia	phenoliruptrix	Paraburkholderia	phenoliruptrix	Y	Y
GCA_902859825	Paraburkholderia	phenoliruptrix	Paraburkholderia	phenoliruptrix	Y	Y
GCA_902860235	Paraburkholderia	phenoliruptrix	Paraburkholderia	phenoliruptrix	Y	Y
GCA_003443895	Paraburkholderia	phosphatilytica	Paraburkholderia	phosphatilytica	Y	Y
GCA_000020045	Paraburkholderia	phymatum	Paraburkholderia	phymatum	Y	Y
GCA_902833665	Paraburkholderia	phymatum	Paraburkholderia	phymatum	Y	Y
GCA_000020125	Paraburkholderia	phytofirmans	Paraburkholderia	phytofirmans	Y	Y
GCA_900007165	Paraburkholderia	piptadeniae	Paraburkholderia	piptadeniae	Y	Y
GCA_000835205	Burkholderia	plantarii	Burkholderia	plantarii	Y	Y
GCA_001411805	Burkholderia	plantarii	Burkholderia	plantarii	Y	Y
GCA_001755835	Burkholderia	plantarii	Burkholderia	plantarii	Y	Y
GCA_902832905	Burkholderia	plantarii	Burkholderia	plantarii	Y	Y
GCA_000011545	Burkholderia	pseudomallei	Burkholderia	pseudomallei	Y	Y
GCA_000012785	Burkholderia	pseudomallei	Burkholderia	pseudomallei	Y	Y
GCA_000015905	Burkholderia	pseudomallei	Burkholderia	pseudomallei	Y	Y
GCA_000015925	Burkholderia	pseudomallei	Burkholderia	pseudomallei	Y	Y
GCA_000152325	Burkholderia	pseudomallei	Burkholderia	pseudomallei	Y	Y
GCA_000152345	Burkholderia	pseudomallei	Burkholderia	pseudomallei	Y	Y
GCA_000152365	Burkholderia	pseudomallei	Burkholderia	pseudomallei	Y	Y
GCA_000152685	Burkholderia	pseudomallei	Burkholderia	pseudomallei	Y	Y
GCA_000169715	Burkholderia	pseudomallei	Burkholderia	pseudomallei	Y	Y
GCA_000182195	Burkholderia	pseudomallei	Burkholderia	pseudomallei	Y	Y
GCA_000182445	Burkholderia	pseudomallei	Burkholderia	pseudomallei	Y	Y
GCA_000182585	Burkholderia	pseudomallei	Burkholderia	pseudomallei	Y	Y
GCA_000193455	Burkholderia	pseudomallei	Burkholderia	pseudomallei	Y	Y
GCA_000193475	Burkholderia	pseudomallei	Burkholderia	pseudomallei	Y	Y
GCA_000195145	Burkholderia	pseudomallei	Burkholderia	pseudomallei	Y	Y
GCA_000259735	Burkholderia	pseudomallei	Burkholderia	pseudomallei	Y	Y
GCA_000259755	Burkholderia	pseudomallei	Burkholderia	pseudomallei	Y	Y
GCA_000259775	Burkholderia	pseudomallei	Burkholderia	pseudomallei	Y	Y
GCA_000259795	Burkholderia	pseudomallei	Burkholderia	pseudomallei	Y	Y
GCA_000259815	Burkholderia	pseudomallei	Burkholderia	pseudomallei	Y	Y
GCA_000260515	Burkholderia	pseudomallei	Burkholderia	pseudomallei	Y	Y
GCA_000294635	Burkholderia	pseudomallei	Burkholderia	pseudomallei	Y	Y
GCA_000347975	Burkholderia	pseudomallei	Burkholderia	pseudomallei	Y	Y
GCA_000350505	Burkholderia	pseudomallei	Burkholderia	pseudomallei	Y	Y
GCA_000402055	Burkholderia	pseudomallei	Burkholderia	pseudomallei	Y	Y
GCA_000410895	Burkholderia	pseudomallei	Burkholderia	pseudomallei	Y	Y
GCA_000439695	Burkholderia	pseudomallei	Burkholderia	pseudomallei	Y	Y
GCA_000445385	Burkholderia	pseudomallei	Burkholderia	pseudomallei	Y	Y
GCA_000452945	Burkholderia	pseudomallei	Burkholderia	pseudomallei	Y	Y
GCA_000452965	Burkholderia	pseudomallei	Burkholderia	pseudomallei	Y	Y
GCA_000452985	Burkholderia	pseudomallei	Burkholderia	pseudomallei	Y	Y
GCA_000453005	Burkholderia	pseudomallei	Burkholderia	pseudomallei	Y	Y
GCA_000454565	Burkholderia	pseudomallei	Burkholderia	pseudomallei	Y	Y
GCA_000454585	Burkholderia	pseudomallei	Burkholderia	pseudomallei	Y	Y
GCA_000454605	Burkholderia	pseudomallei	Burkholderia	pseudomallei	Y	Y
GCA_000454625	Burkholderia	pseudomallei	Burkholderia	pseudomallei	Y	Y
GCA_000454645	Burkholderia	pseudomallei	Burkholderia	pseudomallei	Y	Y
GCA_000454665	Burkholderia	pseudomallei	Burkholderia	pseudomallei	Y	Y
GCA_000454685	Burkholderia	pseudomallei	Burkholderia	pseudomallei	Y	Y
GCA_000454705	Burkholderia	pseudomallei	Burkholderia	pseudomallei	Y	Y
GCA_000464685	Burkholderia	pseudomallei	Burkholderia	pseudomallei	Y	Y
GCA_000494855	Burkholderia	pseudomallei	Burkholderia	pseudomallei	Y	Y
GCA_000500655	Burkholderia	pseudomallei	Burkholderia	pseudomallei	Y	Y
GCA_000511895	Burkholderia	pseudomallei	Burkholderia	pseudomallei	Y	Y
GCA_000511915	Burkholderia	pseudomallei	Burkholderia	pseudomallei	Y	Y
GCA_000520895	Burkholderia	pseudomallei	Burkholderia	pseudomallei	Y	Y
GCA_000521645	Burkholderia	pseudomallei	Burkholderia	pseudomallei	Y	Y
GCA_000583835	Burkholderia	pseudomallei	Burkholderia	pseudomallei	Y	Y
GCA_000648335	Burkholderia	pseudomallei	Burkholderia	pseudomallei	Y	Y
GCA_000648355	Burkholderia	pseudomallei	Burkholderia	pseudomallei	Y	Y
GCA_000714875	Burkholderia	pseudomallei	Burkholderia	pseudomallei	Y	Y
GCA_000755765	Burkholderia	pseudomallei	Burkholderia	pseudomallei	Y	Y
GCA_000755825	Burkholderia	pseudomallei	Burkholderia	pseudomallei	Y	Y
GCA_000755905	Burkholderia	pseudomallei	Burkholderia	pseudomallei	Y	Y
GCA_000755925	Burkholderia	pseudomallei	Burkholderia	pseudomallei	Y	Y
GCA_000755945	Burkholderia	pseudomallei	Burkholderia	pseudomallei	Y	Y
GCA_000755965	Burkholderia	pseudomallei	Burkholderia	pseudomallei	Y	Y
GCA_000756065	Burkholderia	pseudomallei	Burkholderia	pseudomallei	Y	Y
GCA_000756085	Burkholderia	pseudomallei	Burkholderia	pseudomallei	Y	Y
GCA_000756105	Burkholderia	pseudomallei	Burkholderia	pseudomallei	Y	Y
GCA_000756125	Burkholderia	pseudomallei	Burkholderia	pseudomallei	Y	Y
GCA_000756145	Burkholderia	pseudomallei	Burkholderia	pseudomallei	Y	Y
GCA_000756165	Burkholderia	pseudomallei	Burkholderia	pseudomallei	Y	Y
GCA_000756185	Burkholderia	pseudomallei	Burkholderia	pseudomallei	Y	Y
GCA_000756905	Burkholderia	pseudomallei	Burkholderia	pseudomallei	Y	Y
GCA_000756915	Burkholderia	pseudomallei	Burkholderia	pseudomallei	Y	Y
GCA_000756925	Burkholderia	pseudomallei	Burkholderia	pseudomallei	Y	Y
GCA_000756975	Burkholderia	pseudomallei	Burkholderia	pseudomallei	Y	Y
GCA_000756985	Burkholderia	pseudomallei	Burkholderia	pseudomallei	Y	Y
GCA_000757015	Burkholderia	pseudomallei	Burkholderia	pseudomallei	Y	Y
GCA_000757035	Burkholderia	pseudomallei	Burkholderia	pseudomallei	Y	Y
GCA_000757055	Burkholderia	pseudomallei	Burkholderia	pseudomallei	Y	Y
GCA_000757075	Burkholderia	pseudomallei	Burkholderia	pseudomallei	Y	Y
GCA_000757095	Burkholderia	pseudomallei	Burkholderia	pseudomallei	Y	Y
GCA_000757105	Burkholderia	pseudomallei	Burkholderia	pseudomallei	Y	Y
GCA_000757145	Burkholderia	pseudomallei	Burkholderia	pseudomallei	Y	Y
GCA_000757165	Burkholderia	pseudomallei	Burkholderia	pseudomallei	Y	Y
GCA_000757175	Burkholderia	pseudomallei	Burkholderia	pseudomallei	Y	Y
GCA_000757185	Burkholderia	pseudomallei	Burkholderia	pseudomallei	Y	Y
GCA_000757225	Burkholderia	pseudomallei	Burkholderia	pseudomallei	Y	Y
GCA_000757235	Burkholderia	pseudomallei	Burkholderia	pseudomallei	Y	Y
GCA_000757245	Burkholderia	pseudomallei	Burkholderia	pseudomallei	Y	Y
GCA_000757255	Burkholderia	pseudomallei	Burkholderia	pseudomallei	Y	Y
GCA_000757305	Burkholderia	pseudomallei	Burkholderia	pseudomallei	Y	Y
GCA_000757325	Burkholderia	pseudomallei	Burkholderia	pseudomallei	Y	Y
GCA_000763555	Burkholderia	pseudomallei	Burkholderia	pseudomallei	Y	Y
GCA_000764575	Burkholderia	pseudomallei	Burkholderia	pseudomallei	Y	Y
GCA_000770395	Burkholderia	pseudomallei	Burkholderia	pseudomallei	Y	Y
GCA_000770415	Burkholderia	pseudomallei	Burkholderia	pseudomallei	Y	Y
GCA_000770435	Burkholderia	pseudomallei	Burkholderia	pseudomallei	Y	Y
GCA_000770455	Burkholderia	pseudomallei	Burkholderia	pseudomallei	Y	Y
GCA_000770475	Burkholderia	pseudomallei	Burkholderia	pseudomallei	Y	Y
GCA_000770495	Burkholderia	pseudomallei	Burkholderia	pseudomallei	Y	Y
GCA_000770515	Burkholderia	pseudomallei	Burkholderia	pseudomallei	Y	Y
GCA_000770535	Burkholderia	pseudomallei	Burkholderia	pseudomallei	Y	Y
GCA_000770565	Burkholderia	pseudomallei	Burkholderia	pseudomallei	Y	Y
GCA_000773075	Burkholderia	pseudomallei	Burkholderia	pseudomallei	Y	Y
GCA_000773085	Burkholderia	pseudomallei	Burkholderia	pseudomallei	Y	Y
GCA_000773145	Burkholderia	pseudomallei	Burkholderia	pseudomallei	Y	Y
GCA_000773155	Burkholderia	pseudomallei	Burkholderia	pseudomallei	Y	Y
GCA_000773165	Burkholderia	pseudomallei	Burkholderia	pseudomallei	Y	Y
GCA_000773215	Burkholderia	pseudomallei	Burkholderia	pseudomallei	Y	Y
GCA_000773235	Burkholderia	pseudomallei	Burkholderia	pseudomallei	Y	Y
GCA_000773255	Burkholderia	pseudomallei	Burkholderia	pseudomallei	Y	Y
GCA_000773275	Burkholderia	pseudomallei	Burkholderia	pseudomallei	Y	Y
GCA_000773295	Burkholderia	pseudomallei	Burkholderia	pseudomallei	Y	Y
GCA_000773305	Burkholderia	pseudomallei	Burkholderia	pseudomallei	Y	Y
GCA_000773335	Burkholderia	pseudomallei	Burkholderia	pseudomallei	Y	Y
GCA_000773345	Burkholderia	pseudomallei	Burkholderia	pseudomallei	Y	Y
GCA_000773355	Burkholderia	pseudomallei	Burkholderia	pseudomallei	Y	Y
GCA_000773365	Burkholderia	pseudomallei	Burkholderia	pseudomallei	Y	Y
GCA_000773415	Burkholderia	pseudomallei	Burkholderia	pseudomallei	Y	Y
GCA_000774165	Burkholderia	pseudomallei	Burkholderia	pseudomallei	Y	Y
GCA_000774175	Burkholderia	pseudomallei	Burkholderia	pseudomallei	Y	Y
GCA_000774185	Burkholderia	pseudomallei	Burkholderia	pseudomallei	Y	Y
GCA_000774195	Burkholderia	pseudomallei	Burkholderia	pseudomallei	Y	Y
GCA_000774245	Burkholderia	pseudomallei	Burkholderia	pseudomallei	Y	Y
GCA_000774255	Burkholderia	pseudomallei	Burkholderia	pseudomallei	Y	Y
GCA_000774265	Burkholderia	pseudomallei	Burkholderia	pseudomallei	Y	Y
GCA_000774275	Burkholderia	pseudomallei	Burkholderia	pseudomallei	Y	Y
GCA_000774325	Burkholderia	pseudomallei	Burkholderia	pseudomallei	Y	Y
GCA_000774335	Burkholderia	pseudomallei	Burkholderia	pseudomallei	Y	Y
GCA_000774345	Burkholderia	pseudomallei	Burkholderia	pseudomallei	Y	Y
GCA_000774385	Burkholderia	pseudomallei	Burkholderia	pseudomallei	Y	Y
GCA_000774395	Burkholderia	pseudomallei	Burkholderia	pseudomallei	Y	Y
GCA_000774405	Burkholderia	pseudomallei	Burkholderia	pseudomallei	Y	Y
GCA_000774415	Burkholderia	pseudomallei	Burkholderia	pseudomallei	Y	Y
GCA_000774465	Burkholderia	pseudomallei	Burkholderia	pseudomallei	Y	Y
GCA_000774475	Burkholderia	pseudomallei	Burkholderia	pseudomallei	Y	Y
GCA_000774485	Burkholderia	pseudomallei	Burkholderia	pseudomallei	Y	Y
GCA_000774495	Burkholderia	pseudomallei	Burkholderia	pseudomallei	Y	Y
GCA_000774545	Burkholderia	pseudomallei	Burkholderia	pseudomallei	Y	Y
GCA_000774555	Burkholderia	pseudomallei	Burkholderia	pseudomallei	Y	Y
GCA_000774565	Burkholderia	pseudomallei	Burkholderia	pseudomallei	Y	Y
GCA_000774575	Burkholderia	pseudomallei	Burkholderia	pseudomallei	Y	Y
GCA_000774625	Burkholderia	pseudomallei	Burkholderia	pseudomallei	Y	Y
GCA_000774635	Burkholderia	pseudomallei	Burkholderia	pseudomallei	Y	Y
GCA_000774645	Burkholderia	pseudomallei	Burkholderia	pseudomallei	Y	Y
GCA_000774685	Burkholderia	pseudomallei	Burkholderia	pseudomallei	Y	Y
GCA_000774695	Burkholderia	pseudomallei	Burkholderia	pseudomallei	Y	Y
GCA_000774705	Burkholderia	pseudomallei	Burkholderia	pseudomallei	Y	Y
GCA_000774715	Burkholderia	pseudomallei	Burkholderia	pseudomallei	Y	Y
GCA_000774765	Burkholderia	pseudomallei	Burkholderia	pseudomallei	Y	Y
GCA_000774785	Burkholderia	pseudomallei	Burkholderia	pseudomallei	Y	Y
GCA_000774795	Burkholderia	pseudomallei	Burkholderia	pseudomallei	Y	Y
GCA_000774805	Burkholderia	pseudomallei	Burkholderia	pseudomallei	Y	Y
GCA_000774815	Burkholderia	pseudomallei	Burkholderia	pseudomallei	Y	Y
GCA_000774865	Burkholderia	pseudomallei	Burkholderia	pseudomallei	Y	Y
GCA_000774875	Burkholderia	pseudomallei	Burkholderia	pseudomallei	Y	Y
GCA_000774885	Burkholderia	pseudomallei	Burkholderia	pseudomallei	Y	Y
GCA_000774895	Burkholderia	pseudomallei	Burkholderia	pseudomallei	Y	Y
GCA_000774945	Burkholderia	pseudomallei	Burkholderia	pseudomallei	Y	Y
GCA_000774955	Burkholderia	pseudomallei	Burkholderia	pseudomallei	Y	Y
GCA_000774965	Burkholderia	pseudomallei	Burkholderia	pseudomallei	Y	Y
GCA_000774975	Burkholderia	pseudomallei	Burkholderia	pseudomallei	Y	Y
GCA_000775025	Burkholderia	pseudomallei	Burkholderia	pseudomallei	Y	Y
GCA_000775035	Burkholderia	pseudomallei	Burkholderia	pseudomallei	Y	Y
GCA_000775045	Burkholderia	pseudomallei	Burkholderia	pseudomallei	Y	Y
GCA_000775085	Burkholderia	pseudomallei	Burkholderia	pseudomallei	Y	Y
GCA_000775095	Burkholderia	pseudomallei	Burkholderia	pseudomallei	Y	Y
GCA_000775105	Burkholderia	pseudomallei	Burkholderia	pseudomallei	Y	Y
GCA_000775115	Burkholderia	pseudomallei	Burkholderia	pseudomallei	Y	Y
GCA_000775165	Burkholderia	pseudomallei	Burkholderia	pseudomallei	Y	Y
GCA_000775655	Burkholderia	pseudomallei	Burkholderia	pseudomallei	Y	Y
GCA_000775675	Burkholderia	pseudomallei	Burkholderia	pseudomallei	Y	Y
GCA_000775685	Burkholderia	pseudomallei	Burkholderia	pseudomallei	Y	Y
GCA_000932075	Burkholderia	pseudomallei	Burkholderia	pseudomallei	Y	Y
GCA_000932085	Burkholderia	pseudomallei	Burkholderia	pseudomallei	Y	Y
GCA_000932095	Burkholderia	pseudomallei	Burkholderia	pseudomallei	Y	Y
GCA_000932105	Burkholderia	pseudomallei	Burkholderia	pseudomallei	Y	Y
GCA_000932145	Burkholderia	pseudomallei	Burkholderia	pseudomallei	Y	Y
GCA_000953095	Burkholderia	pseudomallei	Burkholderia	pseudomallei	Y	Y
GCA_000954175	Burkholderia	pseudomallei	Burkholderia	pseudomallei	Y	Y
GCA_000959125	Burkholderia	pseudomallei	Burkholderia	pseudomallei	Y	Y
GCA_000959145	Burkholderia	pseudomallei	Burkholderia	pseudomallei	Y	Y
GCA_000959185	Burkholderia	pseudomallei	Burkholderia	pseudomallei	Y	Y
GCA_000959205	Burkholderia	pseudomallei	Burkholderia	pseudomallei	Y	Y
GCA_000959225	Burkholderia	pseudomallei	Burkholderia	pseudomallei	Y	Y
GCA_000959265	Burkholderia	pseudomallei	Burkholderia	pseudomallei	Y	Y
GCA_000959285	Burkholderia	pseudomallei	Burkholderia	pseudomallei	Y	Y
GCA_000959305	Burkholderia	pseudomallei	Burkholderia	pseudomallei	Y	Y
GCA_000959345	Burkholderia	pseudomallei	Burkholderia	pseudomallei	Y	Y
GCA_000961535	Burkholderia	pseudomallei	Burkholderia	pseudomallei	Y	Y
GCA_000970935	Burkholderia	pseudomallei	Burkholderia	pseudomallei	Y	Y
GCA_000970955	Burkholderia	pseudomallei	Burkholderia	pseudomallei	Y	Y
GCA_000981285	Burkholderia	pseudomallei	Burkholderia	pseudomallei	Y	Y
GCA_001182265	Burkholderia	pseudomallei	Burkholderia	pseudomallei	Y	Y
GCA_001182285	Burkholderia	pseudomallei	Burkholderia	pseudomallei	Y	Y
GCA_001182305	Burkholderia	pseudomallei	Burkholderia	pseudomallei	Y	Y
GCA_001182325	Burkholderia	pseudomallei	Burkholderia	pseudomallei	Y	Y
GCA_001186165	Burkholderia	pseudomallei	Burkholderia	pseudomallei	Y	Y
GCA_001191815	Burkholderia	pseudomallei	Burkholderia	pseudomallei	Y	Y
GCA_001192415	Burkholderia	pseudomallei	Burkholderia	pseudomallei	Y	Y
GCA_001192815	Burkholderia	pseudomallei	Burkholderia	pseudomallei	Y	Y
GCA_001193035	Burkholderia	pseudomallei	Burkholderia	pseudomallei	Y	Y
GCA_001193375	Burkholderia	pseudomallei	Burkholderia	pseudomallei	Y	Y
GCA_001193615	Burkholderia	pseudomallei	Burkholderia	pseudomallei	Y	Y
GCA_001193655	Burkholderia	pseudomallei	Burkholderia	pseudomallei	Y	Y
GCA_001194765	Burkholderia	pseudomallei	Burkholderia	pseudomallei	Y	Y
GCA_001194905	Burkholderia	pseudomallei	Burkholderia	pseudomallei	Y	Y
GCA_001195065	Burkholderia	pseudomallei	Burkholderia	pseudomallei	Y	Y
GCA_001195465	Burkholderia	pseudomallei	Burkholderia	pseudomallei	Y	Y
GCA_001196125	Burkholderia	pseudomallei	Burkholderia	pseudomallei	Y	Y
GCA_001196775	Burkholderia	pseudomallei	Burkholderia	pseudomallei	Y	Y
GCA_001197015	Burkholderia	pseudomallei	Burkholderia	pseudomallei	Y	Y
GCA_001197235	Burkholderia	pseudomallei	Burkholderia	pseudomallei	Y	Y
GCA_001197355	Burkholderia	pseudomallei	Burkholderia	pseudomallei	Y	Y
GCA_001197775	Burkholderia	pseudomallei	Burkholderia	pseudomallei	Y	Y
GCA_001197795	Burkholderia	pseudomallei	Burkholderia	pseudomallei	Y	Y
GCA_001197955	Burkholderia	pseudomallei	Burkholderia	pseudomallei	Y	Y
GCA_001198755	Burkholderia	pseudomallei	Burkholderia	pseudomallei	Y	Y
GCA_001199035	Burkholderia	pseudomallei	Burkholderia	pseudomallei	Y	Y
GCA_001199195	Burkholderia	pseudomallei	Burkholderia	pseudomallei	Y	Y
GCA_001199695	Burkholderia	pseudomallei	Burkholderia	pseudomallei	Y	Y
GCA_001199735	Burkholderia	pseudomallei	Burkholderia	pseudomallei	Y	Y
GCA_001199815	Burkholderia	pseudomallei	Burkholderia	pseudomallei	Y	Y
GCA_001199855	Burkholderia	pseudomallei	Burkholderia	pseudomallei	Y	Y
GCA_001200615	Burkholderia	pseudomallei	Burkholderia	pseudomallei	Y	Y
GCA_001200935	Burkholderia	pseudomallei	Burkholderia	pseudomallei	Y	Y
GCA_001202135	Burkholderia	pseudomallei	Burkholderia	pseudomallei	Y	Y
GCA_001202415	Burkholderia	pseudomallei	Burkholderia	pseudomallei	Y	Y
GCA_001202895	Burkholderia	pseudomallei	Burkholderia	pseudomallei	Y	Y
GCA_001203375	Burkholderia	pseudomallei	Burkholderia	pseudomallei	Y	Y
GCA_001203735	Burkholderia	pseudomallei	Burkholderia	pseudomallei	Y	Y
GCA_001204155	Burkholderia	pseudomallei	Burkholderia	pseudomallei	Y	Y
GCA_001204275	Burkholderia	pseudomallei	Burkholderia	pseudomallei	Y	Y
GCA_001204455	Burkholderia	pseudomallei	Burkholderia	pseudomallei	Y	Y
GCA_001204515	Burkholderia	pseudomallei	Burkholderia	pseudomallei	Y	Y
GCA_001205635	Burkholderia	pseudomallei	Burkholderia	pseudomallei	Y	Y
GCA_001205935	Burkholderia	pseudomallei	Burkholderia	pseudomallei	Y	Y
GCA_001206455	Burkholderia	pseudomallei	Burkholderia	pseudomallei	Y	Y
GCA_001206495	Burkholderia	pseudomallei	Burkholderia	pseudomallei	Y	Y
GCA_001207035	Burkholderia	pseudomallei	Burkholderia	pseudomallei	Y	Y
GCA_001207055	Burkholderia	pseudomallei	Burkholderia	pseudomallei	Y	Y
GCA_001207675	Burkholderia	pseudomallei	Burkholderia	pseudomallei	Y	Y
GCA_001207785	Burkholderia	pseudomallei	Burkholderia	pseudomallei	Y	Y
GCA_001208265	Burkholderia	pseudomallei	Burkholderia	pseudomallei	Y	Y
GCA_001208545	Burkholderia	pseudomallei	Burkholderia	pseudomallei	Y	Y
GCA_001209045	Burkholderia	pseudomallei	Burkholderia	pseudomallei	Y	Y
GCA_001209325	Burkholderia	pseudomallei	Burkholderia	pseudomallei	Y	Y
GCA_001209405	Burkholderia	pseudomallei	Burkholderia	pseudomallei	Y	Y
GCA_001209505	Burkholderia	pseudomallei	Burkholderia	pseudomallei	Y	Y
[truncated: 2,064 more rows]
